# Supplementary material
Source: publisher figshare collection journal article supplement (https://acs.figshare.com/ndownloader/files/24171553)

## Supporting Information

### Nickel-Catalyzed Thiocarbonylation of Arylboronic Acids with Sulfonyl Chlorides for the Synthesis of Thioesters

Xinxin Qi,<sup>†</sup> Zhi-Peng Bao,<sup>†</sup> Xin-Tong Yao,<sup>†</sup> Xiao-Feng Wu\*,<sup>†,‡</sup>

<sup>†</sup>Department of Chemistry, Zhejiang Sci-Tech University, Hangzhou, Zhejiang 310018, People's Republic of China

<sup>‡</sup>Leibniz-Institut für Katalyse e.V. an der Universität Rostock, Albert-Einstein-Straße 29a, Rostock 18059, Germany

## Table of Contents

|                                                                                                 |            |
|-------------------------------------------------------------------------------------------------|------------|
| <b>1. General Information</b>                                                                   | <b>S1</b>  |
| <b>2. General Procedure</b>                                                                     | <b>S1</b>  |
| <b>3. Mechanistic Studies</b>                                                                   | <b>S1</b>  |
| <b>4. Characterization of Products</b>                                                          | <b>S4</b>  |
| <b>5. Referances</b>                                                                            | <b>S16</b> |
| <b>6. Copy of <math>^1\text{H}</math> and <math>^{13}\text{C}</math> NMR Spectra of product</b> | <b>S17</b> |

## 1. General Information

Unless otherwise noted, all reactions were carried out under a nitrogen atmosphere. All reagents were from commercial sources, all solvents are extra dry solvents and used as received without further purification. Column chromatography was performed on silica gel (200-300 meshes) using petroleum ether (b.p. 60-90 °C) and ethyl acetate as the eluents.  $^1\text{H}$  and  $^{13}\text{C}$  NMR spectra were taken on 400 MHz instruments and spectral data were reported in ppm relative to tetramethylsilane (TMS) as the internal standard and  $\text{CDCl}_3$  ( $^1\text{H}$  NMR  $\delta$  7.26,  $^{13}\text{C}$  NMR  $\delta$  77.0) as solvent. All coupling constants ( $J$ ) are reported in Hz with the following abbreviations: s = singlet, d = doublet, dd = double doublet, ddd = double doublet of doublets, t = triplet, dt = double triplet, q = quartet, m = multiplet, br = broad. Gas (GC) analyses were performed on a Shimadzu GC-2014C chromatograph equipped with FID detector. Mass spectra (MS) were measured on spectrometer by direct inlet at 70 eV.

## 2. General Procedure

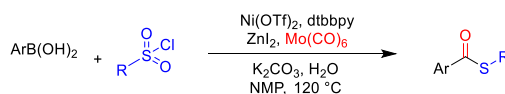

$\text{Ni(OTf)}_2$  (20 mol%, 35.7 mg), dtbbpy (20 mol%, 26.8 mg),  $\text{ZnI}_2$  (40 mol%, 63.8 mg),  $\text{Mo(CO)}_6$  (0.5 mmol, 132.0 mg),  $\text{K}_2\text{CO}_3$  (0.75 mmol, 103.7 mg) were added to an oven-dried tube (15 mL), which was then placed under vacuum and refilled with nitrogen for three times. Phenylboronic acids (0.5 mmol), sulfonyl chlorides (0.75 mmol),  $\text{H}_2\text{O}$  (50 mol%, 4.5 mg), and NMP (2 mL) were added into the tube via syringe. The tube was sealed, and the mixture was stirred at 120 °C (oil bath) for 16 h. After the reaction was completed, the crude mixture was filtered and concentrated under vacuum. The crude product was purified by column chromatography on silica gel to afford the desired thioester products.

1 mmol scale:  $\text{Ni(OTf)}_2$  (20 mol%), dtbbpy (20 mol%),  $\text{ZnI}_2$  (40 mol%),  $\text{Mo(CO)}_6$  (1 mmol),  $\text{K}_2\text{CO}_3$  (1.5 mmol) were added to an oven-dried tube (15 mL), which was then placed under vacuum and refilled with nitrogen for three times. Phenylboronic acids (1 mmol), sulfonyl chlorides (1.5 mmol),  $\text{H}_2\text{O}$  (50 mol%), and NMP (4 mL) were added into the tube via syringe. The tube was sealed, and the mixture was stirred at 120 °C for 16 h. After the reaction was completed, the crude mixture was filtered and concentrated under vacuum. The crude product was purified by column chromatography on silica gel to afford the desired thioester product **3aa** in 70% yield (159.6 mg).

## 3. Mechanistic Studies

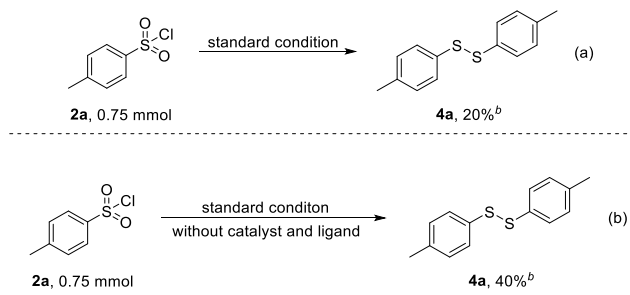

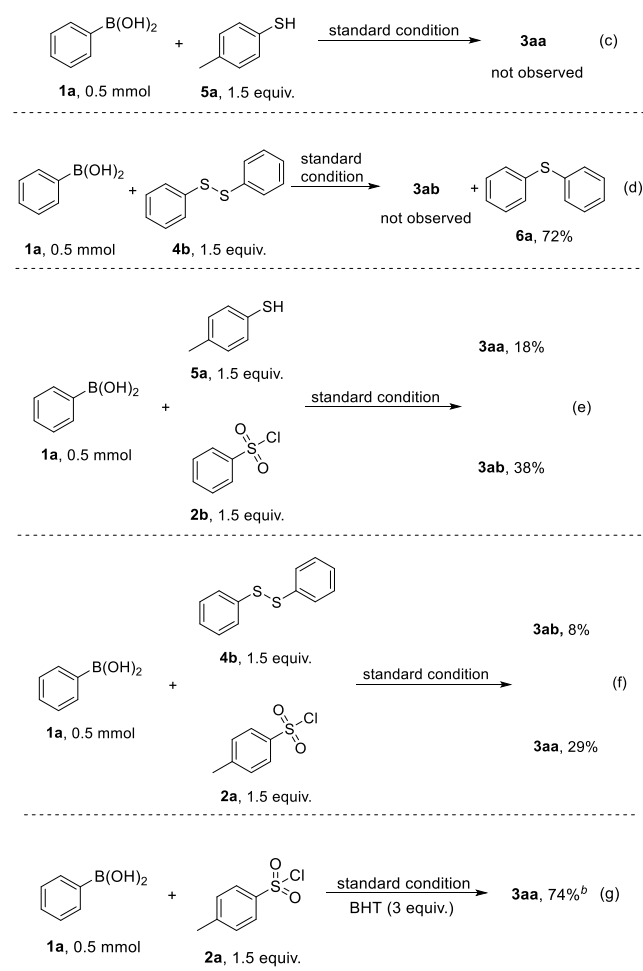

(a) Ni(OTf)<sub>2</sub> (20 mol%, 35.7 mg), dtbbpy (20 mol%, 26.8 mg), ZnI<sub>2</sub> (40 mol%, 63.8 mg), Mo(CO)<sub>6</sub> (0.5 mmol, 132.0 mg), K<sub>2</sub>CO<sub>3</sub> (0.75 mmol, 103.7 mg) were added to an oven-dried tube (15 mL), which was then placed under vacuum and refilled with nitrogen for three times. 4-methylbenzenesulfonyl chloride **2a** (0.75 mmol, 143.0 mg), H<sub>2</sub>O (50 mol%, 4.5 mg), and NMP (2 mL) were added into the tube via syringe. The tube was sealed and the mixture was stirred at 120 °C (oil bath) for 16 h. After the reaction was completed, the crude mixture was filtered and concentrated under vacuum. The crude product was purified by column chromatography (PE, volume ratio) to afford the desired **4a** as a **colorless viscous liquid** (18.5 mg, 20%).

(b) ZnI<sub>2</sub> (40 mol%, 63.8 mg), Mo(CO)<sub>6</sub> (0.5 mmol, 132.0 mg), K<sub>2</sub>CO<sub>3</sub> (0.75 mmol, 103.7 mg) were added to an oven-dried tube (15 mL), which was then placed under vacuum and refilled with nitrogen for three times. 4-methylbenzenesulfonyl chloride **2a** (0.75 mmol, 143.0 mg), H<sub>2</sub>O (50 mol%, 4.5 mg), and NMP (2 mL) were added into the tube via syringe. The tube was sealed and the mixture was stirred at 120 °C (oil bath) for 16 h. After the reaction was completed, the crude mixture was filtered and concentrated under vacuum. The crude product was purified by column chromatography (PE, volume ratio) to afford the desired **4a** as a **colorless viscous liquid** (36.9 mg, 40%).

(c) Ni(OTf)<sub>2</sub> (20 mol%, 35.7 mg), dtbbpy (20 mol%, 26.8 mg), ZnI<sub>2</sub> (40 mol%, 63.8 mg), Mo(CO)<sub>6</sub> (0.5 mmol, 132.0 mg), K<sub>2</sub>CO<sub>3</sub> (0.75 mmol, 103.7 mg) were added to an oven-dried tube (15 mL), which was then placed under vacuum and refilled with nitrogen for three times. Phenylboronic acid **1a** (0.5 mmol, 61.0 mg), 4-methylbenzenethiol **5a** (0.75 mmol, 93.0 mg), H<sub>2</sub>O (50 mol%, 4.5 mg),

and NMP (2 mL) were added into the tube via syringe. The tube was sealed and the mixture was stirred at 120 °C (oil bath) for 16 h.

(d) Ni(OTf)<sub>2</sub> (20 mol%, 35.7 mg), dtbbpy (20 mol%, 26.8 mg), ZnI<sub>2</sub> (40 mol%, 63.8 mg), Mo(CO)<sub>6</sub> (0.5 mmol, 132.0 mg), K<sub>2</sub>CO<sub>3</sub> (0.75 mmol, 103.7 mg) were added to an oven-dried tube (15 mL), which was then placed under vacuum and refilled with nitrogen for three times. Phenylboronic acid **1a** (0.5 mmol, 61.0 mg), 1,2-diphenyldisulfane **4b** (0.75 mmol, 163.5 mg), H<sub>2</sub>O (50 mol%, 4.5 mg), and NMP (2 mL) were added into the tube via syringe. The tube was sealed and the mixture was stirred at 120 °C (oil bath) for 16 h. After the reaction was completed, the product **6a** was observed in 72% yield. (Yields determined by GC analysis using dodecane as an internal standard).

(e) Ni(OTf)<sub>2</sub> (20 mol%, 35.7 mg), dtbbpy (20 mol%, 26.8 mg), ZnI<sub>2</sub> (40 mol%, 63.8 mg), Mo(CO)<sub>6</sub> (0.5 mmol, 132.0 mg), K<sub>2</sub>CO<sub>3</sub> (0.75 mmol, 103.7 mg) were added to an oven-dried tube (15 mL), which was then placed under vacuum and refilled with nitrogen for three times. Phenylboronic acid **1a** (0.5 mmol, 61.0 mg), 4-methylbenzenethiol **5a** (0.75 mmol, 93.0 mg), benzenesulfonyl chloride **2b** (0.75 mmol, 132.0 mg), H<sub>2</sub>O (50 mol%, 4.5 mg), and NMP (2 mL) were added into the tube via syringe. The tube was sealed and the mixture was stirred at 120 °C (oil bath) for 16 h. After the reaction was completed, the product **3aa** was observed in 18% yield, the product **3ab** was observed in 38% yield. (Yields determined by GC analysis using dodecane as an internal standard).

(f) Ni(OTf)<sub>2</sub> (20 mol%, 35.7 mg), dtbbpy (20 mol%, 26.8 mg), ZnI<sub>2</sub> (40 mol%, 63.8 mg), Mo(CO)<sub>6</sub> (0.5 mmol, 132.0 mg), K<sub>2</sub>CO<sub>3</sub> (0.75 mmol, 103.7 mg) were added to an oven-dried tube (15 mL), which was then placed under vacuum and refilled with nitrogen for three times. Phenylboronic acid **1a** (0.5 mmol, 61.0 mg), 1,2-diphenyldisulfane **4b** (0.75 mmol, 163.5 mg), 4-methylbenzenesulfonyl chloride **2a** (0.75 mmol, 143.0 mg), H<sub>2</sub>O (50 mol%, 4.5 mg), and NMP (2 mL) were added into the tube via syringe. The tube was sealed and the mixture was stirred at 120 °C (oil bath) for 16 h. After the reaction was completed, the product **3ab** was observed in 8% yield, the product **3aa** was observed in 29% yield. (Yields determined by GC analysis using dodecane as an internal standard).

(g) BHT (1.5 mmol, 330.5 mg), Ni(OTf)<sub>2</sub> (20 mol%, 35.7 mg), dtbbpy (20 mol%, 26.8 mg), ZnI<sub>2</sub> (40 mol%, 63.8 mg), Mo(CO)<sub>6</sub> (0.5 mmol, 132.0 mg), K<sub>2</sub>CO<sub>3</sub> (0.75 mmol, 103.7 mg) were added to an oven-dried tube (15 mL), which was then placed under vacuum and refilled with nitrogen for three times. Phenylboronic acid **1a** (0.5 mmol, 61.0 mg), 4-methylbenzenesulfonyl chloride **2a** (0.75 mmol, 143.0 mg), H<sub>2</sub>O (50 mol%, 4.5 mg), and NMP (2 mL) were added into the tube via syringe. The tube was sealed and the mixture was stirred at 120 °C (oil bath) for 16 h. Upon completion the mixture was concentrated and purified via flash column chromatography (petroleum ether / ethyl acetate = 100:1, volume ratio) to give the product **3aa** as a **light yellow solid** (84.4 mg, 74%).

#### 4. Characterization of Products

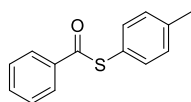

##### S-(*p*-tolyl) benzothioate (**3aa**)<sup>7</sup>

General Procedure was followed with Ni(OTf)<sub>2</sub> (20 mol%, 35.7 mg), dtbbpy (20 mol%, 26.8 mg), ZnI<sub>2</sub> (40 mol%, 63.8 mg), Mo(CO)<sub>6</sub> (0.5 mmol, 132.0 mg), K<sub>2</sub>CO<sub>3</sub> (0.75 mmol, 103.7 mg) were added to an oven-dried tube (15 mL), which was then placed under vacuum and refilled with nitrogen for three times. Phenylboronic acid **1a** (0.5 mmol, 61.0 mg), 4-methylbenzenesulfonyl chloride **2a** (0.75 mmol, 143.0 mg), H<sub>2</sub>O (50 mol%, 4.5 mg), and NMP (2 mL) were added into the tube via syringe. Upon completion the mixture was concentrated and purified via flash column chromatography (petroleum ether / ethyl acetate = 100:1, volume ratio) to give the titled product **3aa** as a **light yellow solid** (82.1 mg, 72%).

<sup>1</sup>H NMR (400 MHz, CDCl<sub>3</sub>) δ 8.02 (d, *J* = 0.6 Hz, 1H), 8.00 (d, *J* = 1.3 Hz, 1H), 7.57 (t, *J* = 7.4 Hz, 1H), 7.45 (t, *J* = 7.7 Hz, 2H), 7.39 (d, *J* = 8.1 Hz, 2H), 7.25 (d, *J* = 7.9 Hz, 2H), 2.39 (s, 3H).

<sup>13</sup>C NMR (101 MHz, CDCl<sub>3</sub>) δ 190.4, 139.7, 136.7, 134.9, 133.5, 130.0, 128.6, 127.4, 123.7, 21.3.

M.p. 65.0 - 67.8 °C

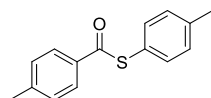

##### S-(*p*-tolyl) 4-methylbenzothioate (**3ba**)<sup>7</sup>

General Procedure was followed with Ni(OTf)<sub>2</sub> (20 mol%, 35.7 mg), dtbbpy (20 mol%, 26.8 mg), ZnI<sub>2</sub> (40 mol%, 63.8 mg), Mo(CO)<sub>6</sub> (0.5 mmol, 132.0 mg), K<sub>2</sub>CO<sub>3</sub> (0.75 mmol, 103.7 mg) were added to an oven-dried tube (15 mL), which was then placed under vacuum and refilled with nitrogen for three times. *p*-tolylboronic acid **1b** (0.5 mmol, 68.0 mg), 4-methylbenzenesulfonyl chloride **2a** (0.75 mmol, 143.0 mg), H<sub>2</sub>O (50 mol%, 4.5 mg), and NMP (2 mL) were added into the tube via syringe. Upon completion the mixture was concentrated and purified via flash column chromatography (petroleum ether / ethyl acetate = 100:1, volume ratio) to give the titled product **3ba** as a **white solid** (62.9 mg, 52%).

<sup>1</sup>H NMR (400 MHz, CDCl<sub>3</sub>) δ 7.92 (d, *J* = 8.2 Hz, 2H), 7.39 (d, *J* = 8.1 Hz, 2H), 7.30 - 7.24 (m, 4H), 2.43 (s, 3H), 2.40 (s, 3H).

<sup>13</sup>C NMR (101 MHz, CDCl<sub>3</sub>) δ 190.1, 144.4, 139.7, 135.0, 134.2, 130.0, 129.4, 127.5, 124.0, 21.7, 21.3.

M.p. 117.3 - 119.5 °C

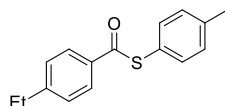

##### S-(*p*-tolyl) 4-ethylbenzothioate (**3ca**)<sup>7</sup>

General Procedure was followed with Ni(OTf)<sub>2</sub> (20 mol%, 35.7 mg), dtbbpy (20 mol%, 26.8 mg), ZnI<sub>2</sub> (40 mol%, 63.8 mg), Mo(CO)<sub>6</sub> (0.5 mmol, 132.0 mg), K<sub>2</sub>CO<sub>3</sub> (0.75 mmol, 103.7 mg) were added to an oven-dried tube (15 mL), which was then placed under vacuum and refilled with nitrogen for three times. (4-ethylphenyl)boronic acid **1c** (0.5 mmol, 75.0 mg), 4-methylbenzenesulfonyl chloride **2a** (0.75 mmol, 143.0 mg), H<sub>2</sub>O (50 mol%, 4.5 mg), and NMP (2 mL) were added into the tube via syringe.

Upon completion the mixture was concentrated and purified via flash column chromatography (petroleum ether / ethyl acetate = 100:1, volume ratio) to give the titled product **3ca** as a **white solid** (112.7 mg, 88%).

**<sup>1</sup>H NMR (400 MHz, CDCl<sub>3</sub>)**  $\delta$  7.95 (d,  $J$  = 8.3 Hz, 2H), 7.39 (d,  $J$  = 8.1 Hz, 2H), 7.30 (d,  $J$  = 8.4 Hz, 2H), 7.26 (d,  $J$  = 8.0 Hz, 2H), 2.72 (q,  $J$  = 7.6 Hz, 2H), 2.40 (s, 3H), 1.26 (t,  $J$  = 7.6 Hz, 3H).

**<sup>13</sup>C NMR (101 MHz, CDCl<sub>3</sub>)**  $\delta$  190.1, 150.6, 139.6, 135.0, 134.4, 130.0, 128.2, 127.6, 124.0, 29.0, 21.3, 15.1.

M.p. 82.4 - 84.5 °C

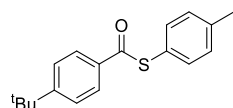

S-(*p*-tolyl) 4-(*tert*-butyl)benzothioate (**3da**)<sup>7</sup>

General Procedure was followed with Ni(OTf)<sub>2</sub> (20 mol%, 35.7 mg), dtbbpy (20 mol%, 26.8 mg), ZnI<sub>2</sub> (40 mol%, 63.8 mg), Mo(CO)<sub>6</sub> (0.5 mmol, 132.0 mg), K<sub>2</sub>CO<sub>3</sub> (0.75 mmol, 103.7 mg) were added to an oven-dried tube (15 mL), which was then placed under vacuum and refilled with nitrogen for three times. (4-(*tert*-butyl)phenyl)boronic acid **1d** (0.5 mmol, 89.1 mg), 4-methylbenzenesulfonyl chloride **2a** (0.75 mmol, 143.0 mg), H<sub>2</sub>O (50 mol%, 4.5 mg), and NMP (2 mL) were added into the tube via syringe. Upon completion the mixture was concentrated and purified via flash column chromatography (petroleum ether / ethyl acetate = 100:1, volume ratio) to give the titled product **3da** as a **white solid** (99.4 mg, 70%).

**<sup>1</sup>H NMR (400 MHz, CDCl<sub>3</sub>)**  $\delta$  7.98 - 7.94 (m, 2H), 7.54 - 7.46 (m, 2H), 7.39 (d,  $J$  = 8.1 Hz, 2H), 7.30 - 7.24 (m, 2H), 2.40 (s, 3H), 1.35 (s, 9H).

**<sup>13</sup>C NMR (101 MHz, CDCl<sub>3</sub>)**  $\delta$  190.1, 157.4, 139.7, 135.0, 134.1, 130.0, 127.4, 125.6, 124.0, 35.2, 31.1, 21.4.

M.p. 74.6 - 77.8 °C

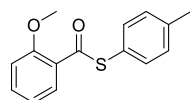

S-(*p*-tolyl) 2-methoxybenzothioate (**3ea**)

General Procedure was followed with Ni(OTf)<sub>2</sub> (20 mol%, 35.7 mg), dtbbpy (20 mol%, 26.8 mg), ZnI<sub>2</sub> (40 mol%, 63.8 mg), Mo(CO)<sub>6</sub> (0.5 mmol, 132.0 mg), K<sub>2</sub>CO<sub>3</sub> (0.75 mmol, 103.7 mg) were added to an oven-dried tube (15 mL), which was then placed under vacuum and refilled with nitrogen for three times. (2-methoxyphenyl)boronic acid **1e** (0.5 mmol, 76.0 mg), 4-methylbenzenesulfonyl chloride **2a** (0.75 mmol, 143.0 mg), H<sub>2</sub>O (50 mol%, 4.5 mg), and NMP (2 mL) were added into the tube via syringe. Upon completion the mixture was concentrated and purified via flash column chromatography (petroleum ether / ethyl acetate = 100:1 to 50:1, volume ratio) to give the titled product **3ea** as a **light yellow viscous liquid** (76.1 mg, 59%).

**<sup>1</sup>H NMR (400 MHz, CDCl<sub>3</sub>)**  $\delta$  7.84 (d,  $J$  = 7.7 Hz, 1H), 7.47 (t,  $J$  = 7.0 Hz, 1H), 7.40 (d,  $J$  = 7.7 Hz, 2H), 7.24 (d,  $J$  = 7.7 Hz, 2H), 7.03 - 6.97 (m, 2H), 3.93 (s, 3H), 2.38 (s, 3H).

**<sup>13</sup>C NMR (101 MHz, CDCl<sub>3</sub>)**  $\delta$  189.5, 158.1, 139.4, 134.8, 133.8, 129.9, 126.4, 125.2, 120.4, 112.1, 55.8, 21.3.

HRMS (ESI-TOF): [M+H]<sup>+</sup> calcd. for C<sub>15</sub>H<sub>15</sub>O<sub>2</sub>S<sup>+</sup>, 259.0787; found, 259.0786.

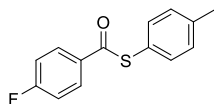

**S-(*p*-tolyl) 4-fluorobenzothioate (**3fa**)<sup>7</sup>**

General Procedure was followed with Ni(OTf)<sub>2</sub> (20 mol%, 35.7 mg), dtbbpy (20 mol%, 26.8 mg), ZnI<sub>2</sub> (40 mol%, 63.8 mg), Mo(CO)<sub>6</sub> (0.5 mmol, 132.0 mg), K<sub>2</sub>CO<sub>3</sub> (0.75 mmol, 103.7 mg) were added to an oven-dried tube (15 mL), which was then placed under vacuum and refilled with nitrogen for three times. (4-fluorophenyl)boronic acid **1f** (0.5 mmol, 70.0 mg), 4-methylbenzenesulfonyl chloride **2a** (0.75 mmol, 143.0 mg), H<sub>2</sub>O (50 mol%, 4.5 mg), and NMP (2 mL) were added into the tube via syringe. Upon completion the mixture was concentrated and purified via flash column chromatography (petroleum ether / ethyl acetate = 100:1, volume ratio) to give the titled product **3fa** as a **white solid** (93.5 mg, 76%).

**<sup>1</sup>H NMR (400 MHz, CDCl<sub>3</sub>)** δ 8.11 - 8.05 (m, 2H), 7.42 (d, *J* = 8.1 Hz, 2H), 7.29 (d, *J* = 8.0 Hz, 2H), 7.21 - 7.13 (m, 2H), 2.43 (s, 3H).

**<sup>13</sup>C NMR (101 MHz, CDCl<sub>3</sub>)** δ 188.9, 165.9 (d, *J* = 255.2 Hz), 139.8, 134.9, 132.9, 130.0, 129.9 (d, *J* = 9.3 Hz), 123.4, 115.8 (d, *J* = 22.0 Hz), 21.3.

M.p. 64.2 - 66.8 °C

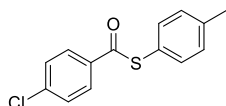

**S-(*p*-tolyl) 4-chlorobenzothioate (**3ga**)<sup>7</sup>**

General Procedure was followed with Ni(OTf)<sub>2</sub> (20 mol%, 35.7 mg), dtbbpy (20 mol%, 26.8 mg), ZnI<sub>2</sub> (40 mol%, 63.8 mg), Mo(CO)<sub>6</sub> (0.5 mmol, 132.0 mg), K<sub>2</sub>CO<sub>3</sub> (0.75 mmol, 103.7 mg) were added to an oven-dried tube (15 mL), which was then placed under vacuum and refilled with nitrogen for three times. (4-chlorophenyl)boronic acid **1g** (0.5 mmol, 78.0 mg), 4-methylbenzenesulfonyl chloride **2a** (0.75 mmol, 143.0 mg), H<sub>2</sub>O (50 mol%, 4.5 mg), and NMP (2 mL) were added into the tube via syringe. Upon completion the mixture was concentrated and purified via flash column chromatography (petroleum ether / ethyl acetate = 100:1, volume ratio) to give the titled product **3ga** as a **white solid** (78.6 mg, 60%).

**<sup>1</sup>H NMR (400 MHz, CDCl<sub>3</sub>)** δ 7.97 (d, *J* = 8.6 Hz, 2H), 7.46 (d, *J* = 8.5 Hz, 2H), 7.39 (d, *J* = 8.1 Hz, 2H), 7.28 (d, *J* = 8.0 Hz, 2H), 2.41 (s, 3H).

**<sup>13</sup>C NMR (101 MHz, CDCl<sub>3</sub>)** δ 189.5, 140.0, 140.0, 135.0, 134.9, 130.2, 129.0, 128.8, 123.3, 21.4.

M.p. 107.5 - 109.3 °C

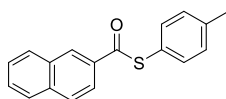

**S-(*p*-tolyl) naphthalene-2-carbothioate (**3ha**)<sup>7</sup>**

General Procedure was followed with Ni(OTf)<sub>2</sub> (20 mol%, 35.7 mg), dtbbpy (20 mol%, 26.8 mg), ZnI<sub>2</sub> (40 mol%, 63.8 mg), Mo(CO)<sub>6</sub> (0.5 mmol, 132.0 mg), K<sub>2</sub>CO<sub>3</sub> (0.75 mmol, 103.7 mg) were added to an oven-dried tube (15 mL), which was then placed under vacuum and refilled with nitrogen for three times. naphthalen-2-ylboronic acid **1h** (0.5 mmol, 86.0 mg), 4-methylbenzenesulfonyl chloride **2a** (0.75 mmol, 143.0 mg), H<sub>2</sub>O (50 mol%, 4.5 mg), and NMP (2 mL) were added into the tube via syringe. Upon completion the mixture was concentrated and purified via flash column chromatography



(petroleum ether / ethyl acetate = 100:1, volume ratio) to give the titled product **3ha** as a **white solid** (116.8 mg, 84%).

**<sup>1</sup>H NMR (400 MHz, CDCl<sub>3</sub>)** δ 8.63 (s, 1H), 8.07 - 7.97 (m, 2H), 7.91 (t, *J* = 8.3 Hz, 2H), 7.67 - 7.55 (m, 2H), 7.51 - 7.44 (m, 2H), 7.30 (d, *J* = 7.8 Hz, 2H), 2.43 (s, 3H).

**<sup>13</sup>C NMR (101 MHz, CDCl<sub>3</sub>)** δ 190.4, 139.8, 135.8, 135.0, 134.0, 132.5, 130.1, 129.6, 128.9, 128.6, 127.8, 126.9, 123.9, 123.3, 21.3.

M.p. 117.2 - 119.5 °C

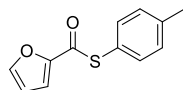

S-(*p*-tolyl) furan-2-carbothioate (**3ia**)<sup>1</sup>

General Procedure was followed with Ni(OTf)<sub>2</sub> (20 mol%, 35.7 mg), dtbbpy (20 mol%, 26.8 mg), ZnI<sub>2</sub> (40 mol%, 63.8 mg), Mo(CO)<sub>6</sub> (0.5 mmol, 132.0 mg), K<sub>2</sub>CO<sub>3</sub> (0.75 mmol, 103.7 mg) were added to an oven-dried tube (15 mL), which was then placed under vacuum and refilled with nitrogen for three times. furan-2-ylboronic acid **1i** (0.5 mmol, 56.0 mg), 4-methylbenzenesulfonyl chloride **2a** (0.75 mmol, 143.0 mg), H<sub>2</sub>O (50 mol%, 4.5 mg), and NMP (2 mL) were added into the tube via syringe. Upon completion the mixture was concentrated and purified via flash column chromatography (petroleum ether / ethyl acetate = 100:1, volume ratio) to give the titled product **3ia** as a **white solid** (60.0 mg, 55%).

**<sup>1</sup>H NMR (400 MHz, CDCl<sub>3</sub>)** δ 7.61 (d, *J* = 0.6 Hz, 1H), 7.38 (d, *J* = 8.0 Hz, 2H), 7.27 - 7.24 (m, 3H), 6.58 - 6.53 (m, 1H), 2.39 (s, 3H).

**<sup>13</sup>C NMR (101 MHz, CDCl<sub>3</sub>)** δ 179.0, 150.4, 146.4, 146.3, 139.9, 135.0, 130.1, 122.6, 116.1, 112.3, 112.3, 21.3.

M.p. 72.5 - 74.8 °C

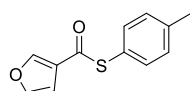

S-(*p*-tolyl) furan-3-carbothioate (**3ja**)

General Procedure was followed with Ni(OTf)<sub>2</sub> (20 mol%, 35.7 mg), dtbbpy (20 mol%, 26.8 mg), ZnI<sub>2</sub> (40 mol%, 63.8 mg), Mo(CO)<sub>6</sub> (0.5 mmol, 132.0 mg), K<sub>2</sub>CO<sub>3</sub> (0.75 mmol, 103.7 mg) were added to an oven-dried tube (15 mL), which was then placed under vacuum and refilled with nitrogen for three times. furan-3-ylboronic acid **1j** (0.5 mmol, 56.0 mg), 4-methylbenzenesulfonyl chloride **2a** (0.75 mmol, 143.0 mg), H<sub>2</sub>O (50 mol%, 4.5 mg), and NMP (2 mL) were added into the tube via syringe. Upon completion the mixture was concentrated and purified via flash column chromatography (petroleum ether / ethyl acetate = 100:1, volume ratio) to give the titled product **3ja** as a **white solid** (65.4 mg, 60%).

**<sup>1</sup>H NMR (400 MHz, CDCl<sub>3</sub>)** δ 8.14 (s, 1H), 7.51 - 7.42 (m, 1H), 7.39 - 7.32 (m, 2H), 7.25 (d, *J* = 3.6 Hz, 2H), 6.81 - 6.76 (m, 1H), 2.39 (s, 3H).

**<sup>13</sup>C NMR (101 MHz, CDCl<sub>3</sub>)** δ 183.5, 146.1, 146.0, 144.1, 144.1, 139.8, 134.8, 130.0, 126.4, 123.1, 108.4, 21.3.

M.p. 65.8 - 68.2 °C

HRMS (ESI-TOF): [M+Na]<sup>+</sup> calcd. for C<sub>12</sub>H<sub>10</sub>NaO<sub>2</sub>S<sup>+</sup>, 241.0294; found, 241.0301.

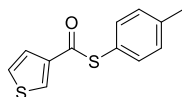

#### S-(*p*-tolyl) thiophene-3-carbothioate (**3ka**)<sup>7</sup>

General Procedure was followed with Ni(OTf)<sub>2</sub> (20 mol%, 35.7 mg), dtbbpy (20 mol%, 26.8 mg), ZnI<sub>2</sub> (40 mol%, 63.8 mg), Mo(CO)<sub>6</sub> (0.5 mmol, 132.0 mg), K<sub>2</sub>CO<sub>3</sub> (0.75 mmol, 103.7 mg) were added to an oven-dried tube (15 mL), which was then placed under vacuum and refilled with nitrogen for three times. thiophen-3-ylboronic acid **1k** (0.5 mmol, 64.0 mg), 4-methylbenzenesulfonyl chloride **2a** (0.75 mmol, 143.0 mg), H<sub>2</sub>O (50 mol%, 4.5 mg), and NMP (2 mL) were added into the tube via syringe. Upon completion the mixture was concentrated and purified via flash column chromatography (petroleum ether / ethyl acetate = 100:1, volume ratio) to give the titled product **3ka** as a **white solid** (105.3 mg, 90%).

<sup>1</sup>H NMR (400 MHz, CDCl<sub>3</sub>) δ 8.26 - 8.22 (m, 1H), 7.65 - 7.60 (m, 1H), 7.47 - 7.38 (m, 3H), 7.31 (d, *J* = 7.9 Hz, 2H), 2.45 (s, 3H).

<sup>13</sup>C NMR (101 MHz, CDCl<sub>3</sub>) δ 184.0, 140.3, 139.8, 134.9, 130.9, 130.0, 126.5, 126.1, 123.6, 21.3.

M.p. 67.8 - 70.2 °C

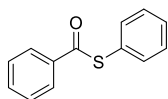

#### S-phenylbenzothioate (**3ab**)<sup>8</sup>

General Procedure was followed with Ni(OTf)<sub>2</sub> (20 mol%, 35.7 mg), dtbbpy (20 mol%, 26.8 mg), ZnI<sub>2</sub> (40 mol%, 63.8 mg), Mo(CO)<sub>6</sub> (0.5 mmol, 132.0 mg), K<sub>2</sub>CO<sub>3</sub> (0.75 mmol, 103.7 mg) were added to an oven-dried tube (15 mL), which was then placed under vacuum and refilled with nitrogen for three times. Phenylboronic acid **1a** (0.5 mmol, 61.0 mg), benzenesulfonyl chloride **2b** (0.75 mmol, 132.0 mg), H<sub>2</sub>O (50 mol%, 4.5 mg), and NMP (2 mL) were added into the tube via syringe. Upon completion the mixture was concentrated and purified via flash column chromatography (petroleum ether / ethyl acetate = 100:1, volume ratio) to give the titled product **3ab** as a **light yellow viscous liquid** (70.7 mg, 66%).

<sup>1</sup>H NMR (400 MHz, CDCl<sub>3</sub>) δ 8.04 (d, *J* = 7.4 Hz, 2H), 7.62 (t, *J* = 7.4 Hz, 1H), 7.55 - 7.49 (m, 4H), 7.48 - 7.45 (m, 3H).

<sup>13</sup>C NMR (101 MHz, CDCl<sub>3</sub>) δ 190.1, 136.7, 135.1, 133.6, 129.5, 129.2, 128.7, 127.5, 127.4.

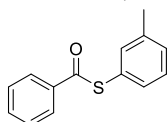

#### S-(*m*-tolyl) benzothioate (**3ac**)

General Procedure was followed with Ni(OTf)<sub>2</sub> (20 mol%, 35.7 mg), dtbbpy (20 mol%, 26.8 mg), ZnI<sub>2</sub> (40 mol%, 63.8 mg), Mo(CO)<sub>6</sub> (0.5 mmol, 132.0 mg), K<sub>2</sub>CO<sub>3</sub> (0.75 mmol, 103.7 mg) were added to an oven-dried tube (15 mL), which was then placed under vacuum and refilled with nitrogen for three times. Phenylboronic acid **1a** (0.5 mmol, 61.0 mg), 3-methylbenzenesulfonyl chloride **2c** (0.75 mmol, 143.0 mg), H<sub>2</sub>O (50 mol%, 4.5 mg), and NMP (2 mL) were added into the tube via syringe. Upon completion the mixture was concentrated and purified via flash column chromatography (petroleum ether / ethyl acetate = 100:1, volume ratio) to give the titled product **3ac** as a **light yellow viscous liquid** (70.7 mg, 62%).

**<sup>1</sup>H NMR (400 MHz, CDCl<sub>3</sub>)** δ 8.04 - 7.96 (m, 2H), 7.61 - 7.55 (m, 1H), 7.45 (t, *J* = 7.7 Hz, 2H), 7.36 - 7.27 (m, 3H), 7.26 - 7.21 (m, 1H), 2.37 (s, 3H).

**<sup>13</sup>C NMR (101 MHz, CDCl<sub>3</sub>)** δ 190.3, 139.1, 136.7, 135.6, 133.5, 132.1, 130.4, 129.0, 128.7, 127.4, 126.9, 21.3.

HRMS (ESI-TOF): [M+H]<sup>+</sup> calcd. for C<sub>14</sub>H<sub>13</sub>OS<sup>+</sup>, 229.0682; found, 229.0689.

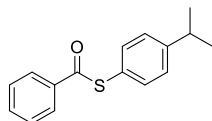

**S-(4-isopropylphenyl)benzothioate (3ad)**

General Procedure was followed with Ni(OTf)<sub>2</sub> (20 mol%, 35.7 mg), dtbbpy (20 mol%, 26.8 mg), ZnI<sub>2</sub> (40 mol%, 63.8 mg), Mo(CO)<sub>6</sub> (0.5 mmol, 132.0 mg), K<sub>2</sub>CO<sub>3</sub> (0.75 mmol, 103.7 mg) were added to an oven-dried tube (15 mL), which was then placed under vacuum and refilled with nitrogen for three times. Phenylboronic acid **1a** (0.5 mmol, 61.0 mg), 4-isopropylbenzenesulfonyl chloride **2d** (0.75 mmol, 163.5 mg), H<sub>2</sub>O (50 mol%, 4.5 mg), and NMP (2 mL) were added into the tube via syringe. Upon completion the mixture was concentrated and purified via flash column chromatography (petroleum ether / ethyl acetate = 100:1, volume ratio) to give the titled product **3ad** as a **white solid** (82.0 mg, 64%).

**<sup>1</sup>H NMR (400 MHz, CDCl<sub>3</sub>)** δ 8.11 - 7.97 (m, 2H), 7.61 (t, *J* = 7.4 Hz, 1H), 7.55 - 7.42 (m, 4H), 7.33 (d, *J* = 8.1 Hz, 2H), 3.02 - 2.91 (m, 1H), 1.29 (d, *J* = 6.9 Hz, 6H).

**<sup>13</sup>C NMR (101 MHz, CDCl<sub>3</sub>)** δ 190.6, 150.5, 136.7, 135.0, 133.5, 128.7, 127.5, 127.4, 124.1, 34.0, 23.8.

M.p. 66.5 - 68.7 °C

HRMS (ESI-TOF): [M+H]<sup>+</sup> calcd. for C<sub>16</sub>H<sub>17</sub>OS<sup>+</sup>, 257.0995; found, 257.0991.

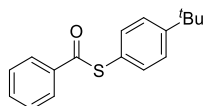

**S-(4-(*tert*-butyl)phenyl)benzothioate (3ae)**

General Procedure was followed with Ni(OTf)<sub>2</sub> (20 mol%, 35.7 mg), dtbbpy (20 mol%, 26.8 mg), ZnI<sub>2</sub> (40 mol%, 63.8 mg), Mo(CO)<sub>6</sub> (0.5 mmol, 132.0 mg), K<sub>2</sub>CO<sub>3</sub> (0.75 mmol, 103.7 mg) were added to an oven-dried tube (15 mL), which was then placed under vacuum and refilled with nitrogen for three times. Phenylboronic acid **1a** (0.5 mmol, 61.0 mg), 4-(*tert*-butyl)benzenesulfonyl chloride **2e** (0.75 mmol, 174.0 mg), H<sub>2</sub>O (50 mol%, 4.5 mg), and NMP (2 mL) were added into the tube via syringe. Upon completion the mixture was concentrated and purified via flash column chromatography (petroleum ether / ethyl acetate = 100:1, volume ratio) to give the titled product **3ae** as a **white solid** (110.7 mg, 82%).

**<sup>1</sup>H NMR (400 MHz, CDCl<sub>3</sub>)** δ 8.04 (d, *J* = 7.7 Hz, 2H), 7.61 (t, *J* = 7.4 Hz, 1H), 7.53 - 7.42 (m, 6H) 1.36 (s, 9H).

**<sup>13</sup>C NMR (101 MHz, CDCl<sub>3</sub>)** δ 190.5, 152.7, 136.7, 134.7, 133.5, 128.7, 127.4, 126.4, 123.8, 34.8, 31.2.

M.p. 69.1 - 71.5 °C

HRMS (ESI-TOF): [M+H]<sup>+</sup> calcd. for C<sub>17</sub>H<sub>19</sub>OS<sup>+</sup>, 271.1151; found, 271.1148.

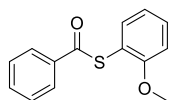

#### S-(2-methoxyphenyl) benzothioate (**3af**)

General Procedure was followed with Ni(OTf)<sub>2</sub> (20 mol%, 35.7 mg), dtbbpy (20 mol%, 26.8 mg), ZnI<sub>2</sub> (40 mol%, 63.8 mg), Mo(CO)<sub>6</sub> (0.5 mmol, 132.0 mg), K<sub>2</sub>CO<sub>3</sub> (0.75 mmol, 103.7 mg) were added to an oven-dried tube (15 mL), which was then placed under vacuum and refilled with nitrogen for three times. Phenylboronic acid **1a** (0.5 mmol, 61.0 mg), 2-methoxybenzenesulfonyl chloride **2f** (0.75 mmol, 154.5 mg), H<sub>2</sub>O (50 mol%, 4.5 mg), and NMP (2 mL) were added into the tube via syringe. Upon completion the mixture was concentrated and purified via flash column chromatography (petroleum ether / ethylacetate = 100:1 to 50:1, volume ratio) to give the titled product **3af** as a **white solid** (94.0 mg, 77%).

**<sup>1</sup>H NMR (400 MHz, CDCl<sub>3</sub>)** δ 8.12 - 8.02 (m, 2H), 7.60 (t, *J* = 7.4 Hz, 1H), 7.52 - 7.44 (m, 4H), 7.09 - 7.00 (m, 2H), 3.86 (s, 3H).

**<sup>13</sup>C NMR (101 MHz, CDCl<sub>3</sub>)** δ 189.2, 159.7, 137.2, 136.7, 133.4, 131.7, 128.6, 127.5, 121.1, 115.4, 111.6, 56.0.

M.p. 97.6 - 100.8 °C

HRMS (ESI-TOF): [M+H]<sup>+</sup> calcd. for C<sub>14</sub>H<sub>13</sub>O<sub>2</sub>S<sup>+</sup>, 245.0631; found, 245.0624.

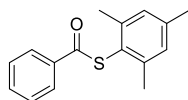

#### S-mesityl benzothioate (**3ag**)

General Procedure was followed with Ni(OTf)<sub>2</sub> (20 mol%, 35.7 mg), dtbbpy (20 mol%, 26.8 mg), ZnI<sub>2</sub> (40 mol%, 63.8 mg), Mo(CO)<sub>6</sub> (0.5 mmol, 132.0 mg), K<sub>2</sub>CO<sub>3</sub> (0.75 mmol, 103.7 mg) were added to an oven-dried tube (15 mL), which was then placed under vacuum and refilled with nitrogen for three times. Phenylboronic acid **1a** (0.5 mmol, 61.0 mg), 2,4,6-trimethylbenzenesulfonyl chloride **2g** (0.75 mmol, 163.5 mg), H<sub>2</sub>O (50 mol%, 4.5 mg), and NMP (2 mL) were added into the tube via syringe. Upon completion the mixture was concentrated and purified via flash column chromatography (petroleum ether / ethyl acetate = 100:1, volume ratio) to give the titled product **3ag** as a **light yellow viscous liquid** (84.5 mg, 66%).

**<sup>1</sup>H NMR (400 MHz, CDCl<sub>3</sub>)** δ 8.12 (d, *J* = 7.5 Hz, 2H), 7.63 (t, *J* = 7.4 Hz, 1H), 7.52 (t, *J* = 7.7 Hz, 2H), 7.07 (s, 2H), 2.40 (s, 6H), 2.36 (s, 3H).

**<sup>13</sup>C NMR (101 MHz, CDCl<sub>3</sub>)** δ 189.4, 142.9, 139.9, 137.0, 133.3, 129.2, 128.6, 127.5, 123.1, 21.6, 21.1.

HRMS (ESI-TOF): [M+H]<sup>+</sup> calcd. for C<sub>16</sub>H<sub>17</sub>OS<sup>+</sup>, 257.0995; found, 257.1002.

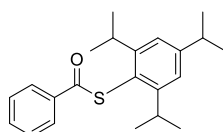

#### S-(2,4,6-triisopropylphenyl) benzothioate (**3ah**)

General Procedure was followed with Ni(OTf)<sub>2</sub> (20 mol%, 35.7 mg), dtbbpy (20 mol%, 26.8 mg), ZnI<sub>2</sub> (40 mol%, 63.8 mg), Mo(CO)<sub>6</sub> (0.5 mmol, 132.0 mg), K<sub>2</sub>CO<sub>3</sub> (0.75 mmol, 103.7 mg) were added to an

oven-dried tube (15 mL), which was then placed under vacuum and refilled with nitrogen for three times. Phenylboronic acid **1a** (0.5 mmol, 61.0 mg), 2,4,6-triisopropylbenzenesulfonyl chloride **2h** (0.75 mmol, 226.6 mg), H<sub>2</sub>O (50 mol%, 4.5 mg), and NMP (2 mL) were added into the tube via syringe. Upon completion the mixture was concentrated and purified via flash column chromatography (petroleum ether / ethyl acetate = 100:1, volume ratio) to give the titled product **3ah** as a **white solid** (149.7 mg, 88%).

**<sup>1</sup>H NMR (400 MHz, CDCl<sub>3</sub>)** δ 8.26 - 8.06 (m, 2H), 7.65 (t, *J* = 7.4 Hz, 1H), 7.54 (t, *J* = 7.6 Hz, 2H), 7.24 - 7.17 (m, 2H), 3.64 - 3.49 (m, 2H), 3.05 - 2.95 (m, 1H), 1.40 - 1.34 (m, 6H), 1.34 - 1.24 (m, 12H).  
**<sup>13</sup>C NMR (101 MHz, CDCl<sub>3</sub>)** δ 190.4, 152.8, 151.1, 137.0, 133.3, 128.6, 127.5, 122.1, 121.2, 34.4, 32.0, 24.4, 23.9, 23.5.

M.p. 69.4 - 72.8 °C

HRMS (ESI-TOF): [M+H]<sup>+</sup> calcd. for C<sub>22</sub>H<sub>29</sub>OS<sup>+</sup>, 341.1934; found, 341.1944.

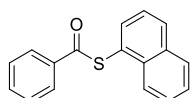

S-(naphthalen-1-yl) benzothioate (**3ai**)<sup>8</sup>

General Procedure was followed with Ni(OTf)<sub>2</sub> (20 mol%, 35.7 mg), dtbbpy (20 mol%, 26.8 mg), ZnI<sub>2</sub> (40 mol%, 63.8 mg), Mo(CO)<sub>6</sub> (0.5 mmol, 132.0 mg), K<sub>2</sub>CO<sub>3</sub> (0.75 mmol, 103.7 mg) were added to an oven-dried tube (15 mL), which was then placed under vacuum and refilled with nitrogen for three times. Phenylboronic acid **1a** (0.5 mmol, 61.0 mg), naphthalene-1-sulfonyl chloride **2i** (0.75 mmol, 169.5 mg), H<sub>2</sub>O (50 mol%, 4.5 mg), and NMP (2 mL) were added into the tube via syringe. Upon completion the mixture was concentrated and purified via flash column chromatography (petroleum ether / ethyl acetate = 100:1, volume ratio) to give the titled product **3ai** as a **white solid** (68.7 mg, 52%).

**<sup>1</sup>H NMR (400 MHz, CDCl<sub>3</sub>)** δ 8.35 - 8.31 (m, 1H), 8.20 (d, *J* = 7.4 Hz, 2H), 8.07 (d, *J* = 8.3 Hz, 1H), 8.02 - 7.96 (m, 1H), 7.88 (d, *J* = 7.1 Hz, 1H), 7.70 (t, *J* = 7.4 Hz, 1H), 7.66 - 7.56 (m, 5H).

**<sup>13</sup>C NMR (101 MHz, CDCl<sub>3</sub>)** δ 189.6, 136.6, 135.5, 134.6, 134.2, 133.7, 131.0, 128.7, 128.6, 127.6, 127.2, 126.4, 125.6, 125.4, 124.8.

M.p. 113.2 - 115.6 °C

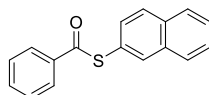

S-(naphthalen-2-yl) benzothioate (**3aj**)<sup>8</sup>

General Procedure was followed with Ni(OTf)<sub>2</sub> (20 mol%, 35.7 mg), dtbbpy (20 mol%, 26.8 mg), ZnI<sub>2</sub> (40 mol%, 63.8 mg), Mo(CO)<sub>6</sub> (0.5 mmol, 132.0 mg), K<sub>2</sub>CO<sub>3</sub> (0.75 mmol, 103.7 mg) were added to an oven-dried tube (15 mL), which was then placed under vacuum and refilled with nitrogen for three times. Phenylboronic acid **1a** (0.5 mmol, 61.0 mg), naphthalene-2-sulfonyl chloride **2j** (0.75 mmol, 169.5 mg), H<sub>2</sub>O (50 mol%, 4.5 mg), and NMP (2 mL) were added into the tube via syringe. Upon completion the mixture was concentrated and purified via flash column chromatography (petroleum ether / ethyl acetate = 100:1, volume ratio) to give the titled product **3aj** as a **white solid** (85.8 mg, 65%).

**<sup>1</sup>H NMR (400 MHz, CDCl<sub>3</sub>)** δ 8.14 - 8.10 (m, 3H), 7.97 - 7.86 (m, 3H), 7.66 - 7.49 (m, 6H).

$^{13}\text{C}$  NMR (101 MHz,  $\text{CDCl}_3$ )  $\delta$  190.2, 136.6, 134.9, 133.6, 133.5, 133.3, 131.3, 128.7, 128.7, 127.9, 127.7, 127.4, 127.1, 126.5, 124.6.

M.p. 100.8 - 103.5 °C

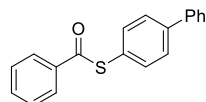

S-([1,1'-biphenyl]-4-yl) benzothioate (**3ak**)

General Procedure was followed with  $\text{Ni}(\text{OTf})_2$  (20 mol%, 35.7 mg), dtbbpy (20 mol%, 26.8 mg),  $\text{ZnI}_2$  (40 mol%, 63.8 mg),  $\text{Mo}(\text{CO})_6$  (0.5 mmol, 132.0 mg),  $\text{K}_2\text{CO}_3$  (0.75 mmol, 103.7 mg) were added to an oven-dried tube (15 mL), which was then placed under vacuum and refilled with nitrogen for three times. Phenylboronic acid **1a** (0.5 mmol, 61.0 mg), [1,1'-biphenyl]-4-sulfonyl chloride **2k** (0.75 mmol, 189.0 mg),  $\text{H}_2\text{O}$  (50 mol%, 4.5 mg), and NMP (2 mL) were added into the tube via syringe. Upon completion the mixture was concentrated and purified via flash column chromatography (petroleum ether / ethyl acetate = 100:1, volume ratio) to give the titled product **3ak** as a **white solid** (98.6 mg, 68%).

$^1\text{H}$  NMR (400 MHz,  $\text{CDCl}_3$ )  $\delta$  8.09 - 8.06 (m, 2H), 7.69 (d,  $J$  = 8.3 Hz, 2H), 7.66 - 7.58 (m, 5H), 7.56 - 7.44 (m, 4H), 7.40 (t,  $J$  = 7.3 Hz, 1H).

$^{13}\text{C}$  NMR (101 MHz,  $\text{CDCl}_3$ )  $\delta$  190.2, 142.5, 140.2, 136.6, 135.4, 133.7, 128.8, 128.8, 128.0, 127.8, 127.5, 127.2, 126.2.

M.p. 140.6 - 142.8 °C

HRMS (ESI-TOF):  $[\text{M}+\text{H}]^+$  calcd. for  $\text{C}_{19}\text{H}_{15}\text{OS}^+$ , 291.0838; found, 291.0848.

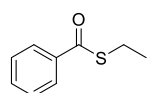

S-ethylbenzothioate (**3al**)<sup>2</sup>

General Procedure was followed with  $\text{Ni}(\text{OTf})_2$  (20 mol%, 35.7 mg), dtbbpy (20 mol%, 26.8 mg),  $\text{ZnI}_2$  (40 mol%, 63.8 mg),  $\text{Mo}(\text{CO})_6$  (0.5 mmol, 132.0 mg),  $\text{K}_2\text{CO}_3$  (0.75 mmol, 103.7 mg) were added to an oven-dried tube (15 mL), which was then placed under vacuum and refilled with nitrogen for three times. Phenylboronic acid **1a** (0.5 mmol, 61.0 mg), ethanesulfonyl chloride **2l** (0.75 mmol, 96.0 mg),  $\text{H}_2\text{O}$  (50 mol%, 4.5 mg), and NMP (2 mL) were added into the tube via syringe. Upon completion the mixture was concentrated and purified via flash column chromatography (petroleum ether, volume ratio) to give the titled product **3al** as a **Light yellow liquid** (46.5 mg, 56%).

$^1\text{H}$  NMR (400 MHz,  $\text{CDCl}_3$ )  $\delta$  8.01 - 7.92 (m, 2H), 7.60 - 7.53 (m, 1H), 7.44 (t,  $J$  = 7.7 Hz, 2H), 3.08 (q,  $J$  = 7.4 Hz, 2H), 1.35 (t,  $J$  = 7.4 Hz, 3H).

$^{13}\text{C}$  NMR (101 MHz,  $\text{CDCl}_3$ )  $\delta$  192.0, 137.2, 133.2, 128.5, 127.1, 23.4, 14.7.

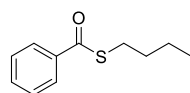

S-butylbenzothioate (**3am**)<sup>4</sup>

General Procedure was followed with  $\text{Ni}(\text{OTf})_2$  (20 mol%, 35.7 mg), dtbbpy (20 mol%, 26.8 mg),  $\text{ZnI}_2$  (40 mol%, 63.8 mg),  $\text{Mo}(\text{CO})_6$  (0.5 mmol, 132.0 mg),  $\text{K}_2\text{CO}_3$  (0.75 mmol, 103.7 mg) were added to an oven-dried tube (15 mL), which was then placed under vacuum and refilled with nitrogen for three times. Phenylboronic acid **1a** (0.5 mmol, 61.0 mg), butane-1-sulfonyl chloride **2m** (0.75 mmol, 117.0

mg), H<sub>2</sub>O (50 mol%, 4.5 mg), and NMP (2 mL) were added into the tube via syringe. Upon completion the mixture was concentrated and purified via flash column chromatography (petroleum ether, volume ratio) to give the titled product **3am** as a **Colorless liquid** (70.8 mg, 73%).

**<sup>1</sup>H NMR (400 MHz, CDCl<sub>3</sub>)** δ 8.00 - 7.95 (m, 2H), 7.55 (t, *J* = 7.4 Hz, 1H), 7.44 (t, *J* = 7.7 Hz, 2H), 3.08 (t, *J* = 7.3 Hz, 2H), 1.79 - 1.58 (m, 2H), 1.57 - 1.36 (m, 2H), 0.95 (t, *J* = 7.3 Hz, 3H).

**<sup>13</sup>C NMR (101 MHz, CDCl<sub>3</sub>)** δ 192.1, 137.3, 133.2, 128.5, 127.1, 31.6, 28.7, 22.0, 13.6.

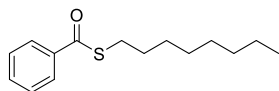

### S-octyl benzothioate (**3an**)<sup>3</sup>

General Procedure was followed with Ni(OTf)<sub>2</sub> (20 mol%, 35.7 mg), dtbbpy (20 mol%, 26.8 mg), ZnI<sub>2</sub> (40 mol%, 63.8 mg), Mo(CO)<sub>6</sub> (0.5 mmol, 132.0 mg), K<sub>2</sub>CO<sub>3</sub> (0.75 mmol, 103.7 mg) were added to an oven-dried tube (15 mL), which was then placed under vacuum and refilled with nitrogen for three times. Phenylboronic acid **1a** (0.5 mmol, 61.0 mg), octane-1-sulfonyl chloride **2n** (0.75 mmol, 159.0 mg), H<sub>2</sub>O (50 mol%, 4.5 mg), and NMP (2 mL) were added into the tube via syringe. Upon completion the mixture was concentrated and purified via flash column chromatography (petroleum ether, volume ratio) to give the titled product **3an** as a **Colorless liquid** (70.0 mg, 56%).

**<sup>1</sup>H NMR (400 MHz, CDCl<sub>3</sub>)** δ 8.05 - 7.97 (m, 2H), 7.60 (t, *J* = 7.4 Hz, 1H), 7.49 (t, *J* = 7.7 Hz, 2H), 3.12 (t, *J* = 7.4 Hz, 2H), 1.76 - 1.68 (m, 2H), 1.52 - 1.43 (m, 2H), 1.38 - 1.31 (m, 8H), 0.93 (t, *J* = 6.8 Hz, 3H).

**<sup>13</sup>C NMR (101 MHz, CDCl<sub>3</sub>)** δ 192.1, 137.3, 133.1, 128.5, 127.1, 31.8, 29.5, 29.1, 29.1, 29.0, 28.9, 22.6, 14.1.

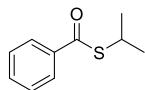

### S-isopropyl benzothioate (**3ao**)<sup>3</sup>

General Procedure was followed with Ni(OTf)<sub>2</sub> (20 mol%, 35.7 mg), dtbbpy (20 mol%, 26.8 mg), ZnI<sub>2</sub> (40 mol%, 63.8 mg), Mo(CO)<sub>6</sub> (0.5 mmol, 132.0 mg), K<sub>2</sub>CO<sub>3</sub> (0.75 mmol, 103.7 mg) were added to an oven-dried tube (15 mL), which was then placed under vacuum and refilled with nitrogen for three times. Phenylboronic acid **1a** (0.5 mmol, 61.0 mg), propane-2-sulfonyl chloride **2o** (0.75 mmol, 106.5 mg), H<sub>2</sub>O (50 mol%, 4.5 mg), and NMP (2 mL) were added into the tube via syringe. Upon completion the mixture was concentrated and purified via flash column chromatography (petroleum ether, volume ratio) to give the titled product **3ao** as a **Light yellow liquid** (61.2 mg, 68%).

**<sup>1</sup>H NMR (400 MHz, CDCl<sub>3</sub>)** δ 7.96 - 7.93 (m, 2H), 7.58 - 7.52 (m, 1H), 7.43 (t, *J* = 7.7 Hz, 2H), 3.92 - 3.80 (m, 1H), 1.41 (d, *J* = 6.9 Hz, 6H).

**<sup>13</sup>C NMR (101 MHz, CDCl<sub>3</sub>)** δ 192.0, 137.4, 133.1, 128.5, 127.1, 34.9, 23.1.

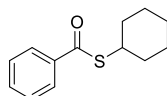

### S-cyclohexyl benzothioate (**3ap**)<sup>5</sup>

General Procedure was followed with Ni(OTf)<sub>2</sub> (20 mol%, 35.7 mg), dtbbpy (20 mol%, 26.8 mg), ZnI<sub>2</sub> (40 mol%, 63.8 mg), Mo(CO)<sub>6</sub> (0.5 mmol, 132.0 mg), K<sub>2</sub>CO<sub>3</sub> (0.75 mmol, 103.7 mg) were added to an oven-dried tube (15 mL), which was then placed under vacuum and refilled with nitrogen for three

times. Phenylboronic acid **1a** (0.5 mmol, 61.0 mg), cyclohexanesulfonyl chloride **2p** (0.75 mmol, 136.5 mg), H<sub>2</sub>O (50 mol%, 4.5 mg), and NMP (2 mL) were added into the tube via syringe. Upon completion the mixture was concentrated and purified via flash column chromatography (petroleum ether, volume ratio) to give the titled product **3ap** as a **colorless liquid** (71.5 mg, 65%).

**<sup>1</sup>H NMR (400 MHz, CDCl<sub>3</sub>)** δ 7.98 - 7.93 (m, 2H), 7.54 (t, *J* = 7.4 Hz, 1H), 7.42 (t, *J* = 7.7 Hz, 2H), 3.79 - 3.64 (m, 1H), 2.06 - 1.97 (m, 2H), 1.81 - 1.72 (m, 2H), 1.68 - 1.60 (m, 1H), 1.58 - 1.46 (m, 4H), 1.37 - 1.27 (m, 1H).

**<sup>13</sup>C NMR (101 MHz, CDCl<sub>3</sub>)** δ 191.7, 137.4, 133.0, 128.4, 127.1, 42.5, 33.1, 26.0, 25.6.

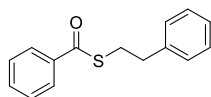

#### S-phenethyl benzothioate (**3aq**)<sup>6</sup>

General Procedure was followed with Ni(OTf)<sub>2</sub> (20 mol%, 35.7 mg), dtbbpy (20 mol%, 26.8 mg), ZnI<sub>2</sub> (40 mol%, 63.8 mg), Mo(CO)<sub>6</sub> (0.5 mmol, 132.0 mg), K<sub>2</sub>CO<sub>3</sub> (0.75 mmol, 103.7 mg) were added to an oven-dried tube (15 mL), which was then placed under vacuum and refilled with nitrogen for three times. Phenylboronic acid **1a** (0.5 mmol, 61.0 mg), 2-phenylethane-1-sulfonyl chloride **2q** (0.75 mmol, 153.0 mg), H<sub>2</sub>O (50 mol%, 4.5 mg), and NMP (2 mL) were added into the tube via syringe. Upon completion the mixture was concentrated and purified via flash column chromatography (petroleum ether / ethyl acetate = 100:1, volume ratio) to give the titled product **3aq** as a **colorless liquid** (75.0 mg, 62%).

**<sup>1</sup>H NMR (400 MHz, CDCl<sub>3</sub>)** δ 7.96 (d, *J* = 7.7 Hz, 2H), 7.56 (t, *J* = 7.4 Hz, 1H), 7.43 (t, *J* = 7.7 Hz, 2H), 7.36 - 7.20 (m, 5H), 3.35 - 3.28 (m, 2H), 3.01 - 2.92 (m, 2H).

**<sup>13</sup>C NMR (101 MHz, CDCl<sub>3</sub>)** δ 191.8, 140.0, 137.1, 133.3, 128.6, 128.6, 128.5, 127.2, 126.5, 35.9, 30.4.

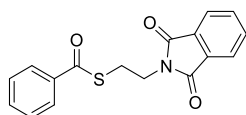

#### S-(2-(1,3-dioxoisindolin-2-yl)ethyl) benzothioate (**3ar**)

General Procedure was followed with Ni(OTf)<sub>2</sub> (20 mol%, 35.7 mg), dtbbpy (20 mol%, 26.8 mg), ZnI<sub>2</sub> (40 mol%, 63.8 mg), Mo(CO)<sub>6</sub> (0.5 mmol, 132.0 mg), K<sub>2</sub>CO<sub>3</sub> (0.75 mmol, 103.7 mg) were added to an oven-dried tube (15 mL), which was then placed under vacuum and refilled with nitrogen for three times. Phenylboronic acid **1a** (0.5 mmol, 61.0 mg), 2-(1,3-dioxoisindolin-2-yl)ethane-1-sulfonyl chloride **2r** (0.75 mmol, 204.7 mg), H<sub>2</sub>O (50 mol%, 4.5 mg), and NMP (2 mL) were added into the tube via syringe. Upon completion the mixture was concentrated and purified via flash column chromatography (petroleum ether / ethyl acetate = 30:1 to 20:1, volume ratio) to give the titled product **3ar** as a **white solid** (77.8 mg, 50%).

**<sup>1</sup>H NMR (400 MHz, CDCl<sub>3</sub>)** δ 7.94 - 7.90 (m, 2H), 7.88 - 7.83 (m, 2H), 7.74 - 7.69 (m, 2H), 7.56 (t, *J* = 7.4 Hz, 1H), 7.42 (t, *J* = 7.7 Hz, 2H), 4.02 (t, *J* = 6.6 Hz, 2H), 3.41 (t, *J* = 6.6 Hz, 2H).

**<sup>13</sup>C NMR (101 MHz, CDCl<sub>3</sub>)** δ 190.9, 168.0, 136.7, 134.0, 133.5, 132.0, 128.6, 127.3, 123.4, 37.2, 27.5.

M.p. 113.3 - 115.5 °C

HRMS (ESI-TOF): [M+H]<sup>+</sup> calcd. for C<sub>17</sub>H<sub>14</sub>NO<sub>3</sub>S<sup>+</sup>, 312.0689; found, 312.0692.



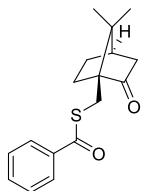

S-(((1S,4R)-7,7-dimethyl-2-oxobicyclo[2.2.1]heptan-1-yl)methyl) benzothioate (**3as**)

General Procedure was followed with Ni(OTf)<sub>2</sub> (20 mol%, 35.7 mg), dtbbpy (20 mol%, 26.8 mg), ZnI<sub>2</sub> (40 mol%, 63.8 mg), Mo(CO)<sub>6</sub> (0.5 mmol, 132.0 mg), K<sub>2</sub>CO<sub>3</sub> (0.75 mmol, 103.7 mg) were added to an oven-dried tube (15 mL), which was then placed under vacuum and refilled with nitrogen for three times. Phenylboronic acid **1a** (0.5 mmol, 61.0 mg), ((1S,4R)-7,7-dimethyl-2-oxobicyclo[2.2.1]heptan-1-yl)methanesulfonyl chloride **2s** (0.75 mmol, 187.5 mg), H<sub>2</sub>O (50 mol%, 4.5 mg), and NMP (2 mL) were added into the tube via syringe. Upon completion the mixture was concentrated and purified via flash column chromatography (petroleum ether / ethyl acetate = 100:1, volume ratio) to give the titled product **3as** as a **colorless viscous liquid** (108.0 mg, 75%).

**<sup>1</sup>H NMR (400 MHz, CDCl<sub>3</sub>)** δ 8.03 - 7.95 (m, 2H), 7.58 - 7.51 (m, 1H), 7.43 (t, *J* = 7.7 Hz, 2H), 3.38 (d, *J* = 13.8 Hz, 1H), 3.13 (d, *J* = 13.8 Hz, 1H), 2.45 - 2.36 (m, 1H), 2.11 (t, *J* = 4.4 Hz, 1H), 2.04 - 1.94 (m, 1H), 1.93 - 1.85 (m, 2H), 1.61 - 1.52 (m, 1H), 1.41 - 1.31 (m, 1H), 1.11 (s, 3H), 0.95 (s, 3H).

**<sup>13</sup>C NMR (101 MHz, CDCl<sub>3</sub>)** δ 217.2, 192.2, 137.0, 133.2, 128.5, 127.2, 60.7, 47.9, 43.7, 43.0, 26.7, 26.6, 24.9, 20.1, 19.7.

HRMS (ESI-TOF): [M+H]<sup>+</sup> calcd. for C<sub>17</sub>H<sub>21</sub>O<sub>2</sub>S<sup>+</sup>, 289.1257; found, 289.1269.

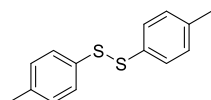

1,2-di-*p*-tolyl disulfane (**4a**)<sup>9</sup>

General Procedure was followed with **3 (a)** and **3 (b)**.

**<sup>1</sup>H NMR (400 MHz, CDCl<sub>3</sub>)** δ 7.39 (d, *J* = 8.2 Hz, 2H), 7.11 (d, *J* = 8.1 Hz, 2H), 2.32 (s, 6H).

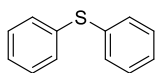

Diphenyl sulfide (**6a**)<sup>10</sup>

General Procedure was followed with **3 (d)**.

**GC-MS (EI, 70eV):** *m/z*(%) = 186 (M<sup>+</sup>, 100), 185 (80), 184 (40), 171 (10), 152 (10), 77 (10), 65 (10), 51 (15).

## 5. References

- (1) Lin, S-M.; Zhang, J-L.; Chen, J-X.; Gao, W-X.; Ding, J-C.; Su, W-K.; Wu, H-Y. An approach to the synthesis of thioesters and selenoesters promoted by rongaliter. *J. Braz. Chem. Soc.* **2010**, *21*, 1616-1620.
- (2) Feng, W.; Liu, H.; Fu, H.; Jiang, Y.; Zhao, Y. Highly efficient iron(II) chloride/*N*-bromosuccinimide-mediated synthesis of imides and acylsulfonamides. *Adv. Synth. Catal.* **2009**, *351*, 246-252.
- (3) Cao, H.; McNamee, L.; Alper, H. Palladium-catalyzed thiocarbonylation of iodoarenes with thiols in phosphonium salt ionic liquids. *J. Org. Chem.* **2008**, *73*, 3530-3534.
- (4) Zhang, M.; Vedantham, P.; Flynn, D. L.; Hanson, P.R. High-load, soluble oligomeric carbodiimide: synthesis and application in coupling reactions. *J. Org. Chem.* **2004**, *69*, 8340-8344.
- (5) Nowrouzi, N.; Mehranpour, A. M.; Rad, J. A. A simple and convenient method for preparation of carboxylic acid alkyl esters, phenolic and thioesters using chlorodiphenylphosphine/I<sub>2</sub> and imidazole reagent system. *Tetrahedron* **2010**, *66*, 9596-9601.
- (6) Gopinath, P.; Vidyarini, R. S.; Chandrasekaran, S. Synthesis of thioesters by simultaneous activation of carboxylic acids and alcohols using PPh<sub>3</sub>/NBS with benzyltriethylammonium tetrathiomolybdate as the sulfur transfer reagent. *Eur. J. Org. Chem.* **2009**, 6043-6047.
- (7) Qi, X.; Bao, Z-P.; Wu, X-F. Palladium-catalyzed carbonylative transformation of aryl iodides and sulfonyl chlorides: convenient access to thioesters. *Org. Chem. Front.* **2020**, *7*, 885-889.
- (8) Kim, M.; Yu, S.; Kim, J. G.; Lee, S. Palladium-catalyzed carbonylation of thioacetates and aryl iodides for the synthesis of S-aryl thioesters. *Org. Chem. Front.* **2018**, *5*, 2447-2452.
- (9) Iranpoor, N.; Firouzabadi, H.; Jamalian, A. Deoxygenation of sulfoxides and reductive coupling of sulfonyl chlorides, sulfonates and thiosulfonates using silphos [PCl<sub>3-n</sub>(SiO<sub>2</sub>)<sub>n</sub>] as a heterogeneous phosphine reagent. *Synlett* **2005**, 1147-1449.
- (10) Bhowmik, A.; Yadav, M.; Fernandes, R. A. Room temperature nickel-catalyzed cross coupling of aryl-boronic acids with thiophenols: synthesis of diarylsulfides. *Org. Biomol. Chem.*, **2020**, *18*, 2447-2458.

## 6. Copy of $^1\text{H}$ and $^{13}\text{C}$ NMR Spectra of product

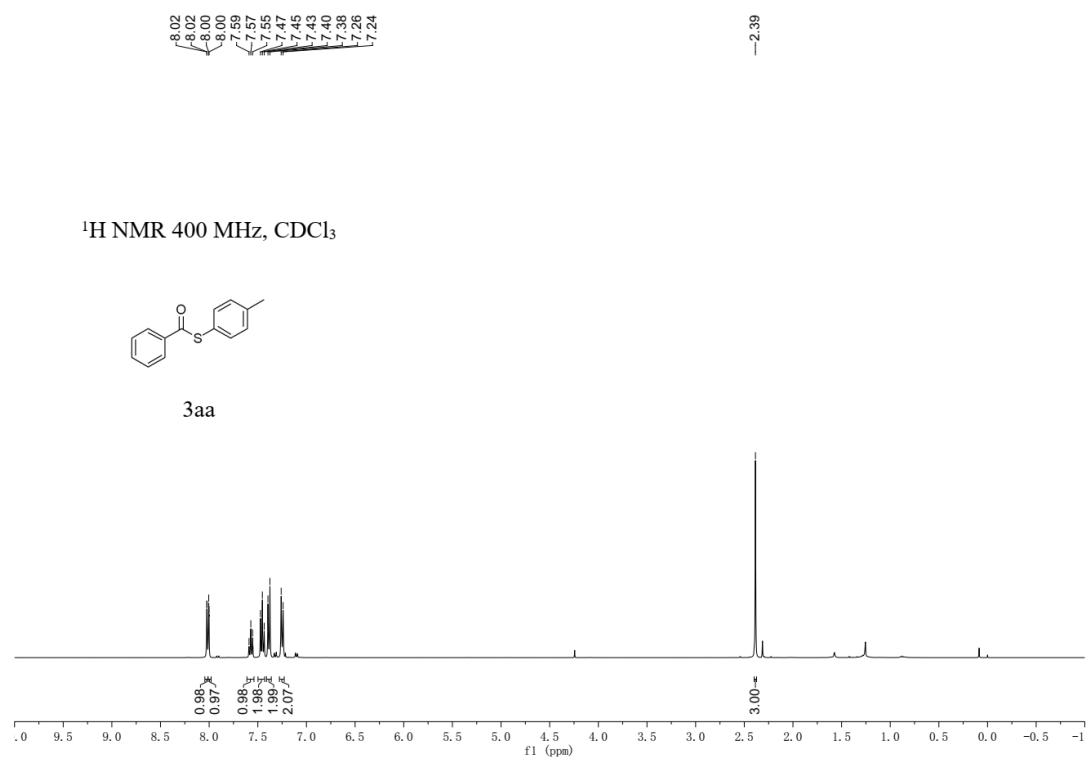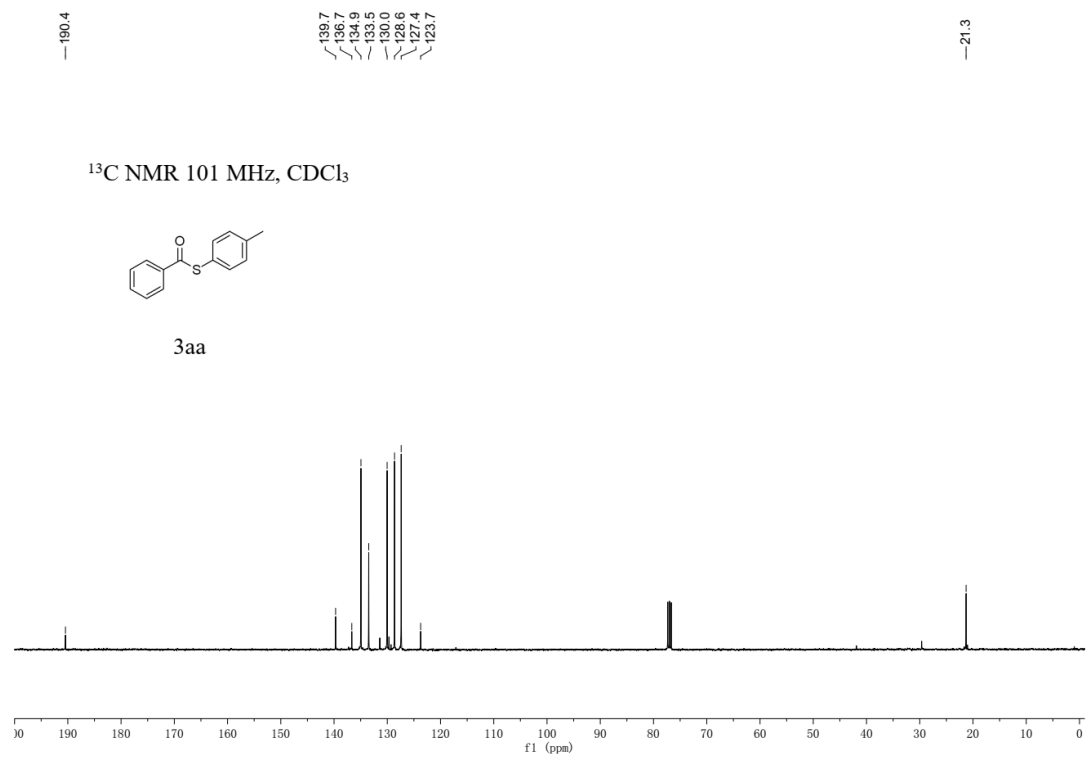

7.93  
7.91  
7.40  
7.38  
7.29  
7.27  
7.25

2.43  
2.40

$^1\text{H}$  NMR 400 MHz,  $\text{CDCl}_3$

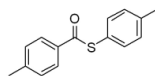

3ba

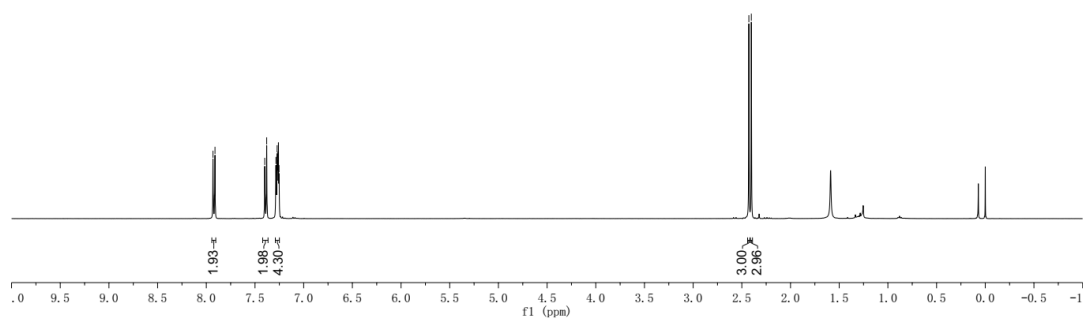

190.1

144.4  
138.7  
135.0  
134.2  
130.0  
129.4  
127.5  
124.0

21.7  
21.3

$^{13}\text{C}$  NMR 101 MHz,  $\text{CDCl}_3$

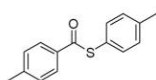

3ba

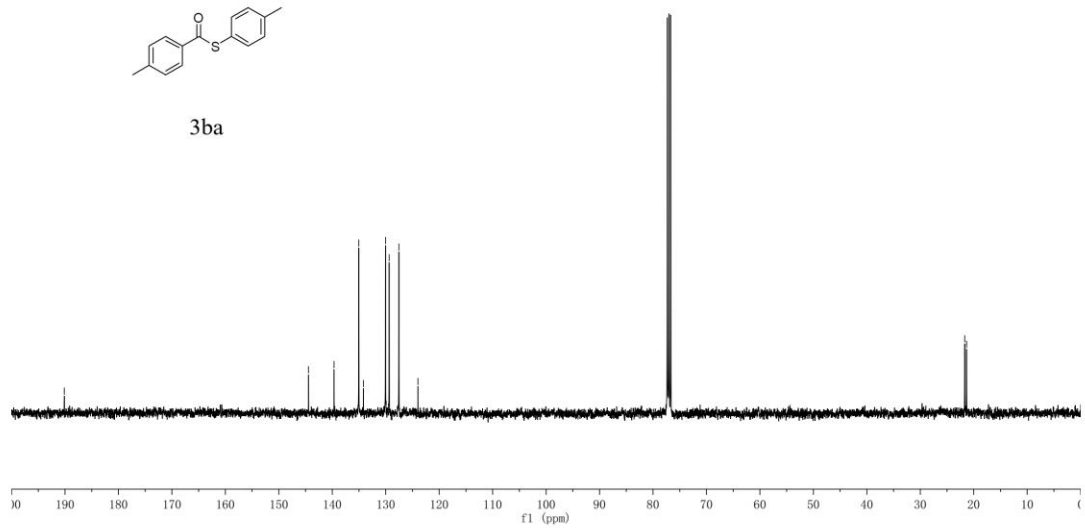

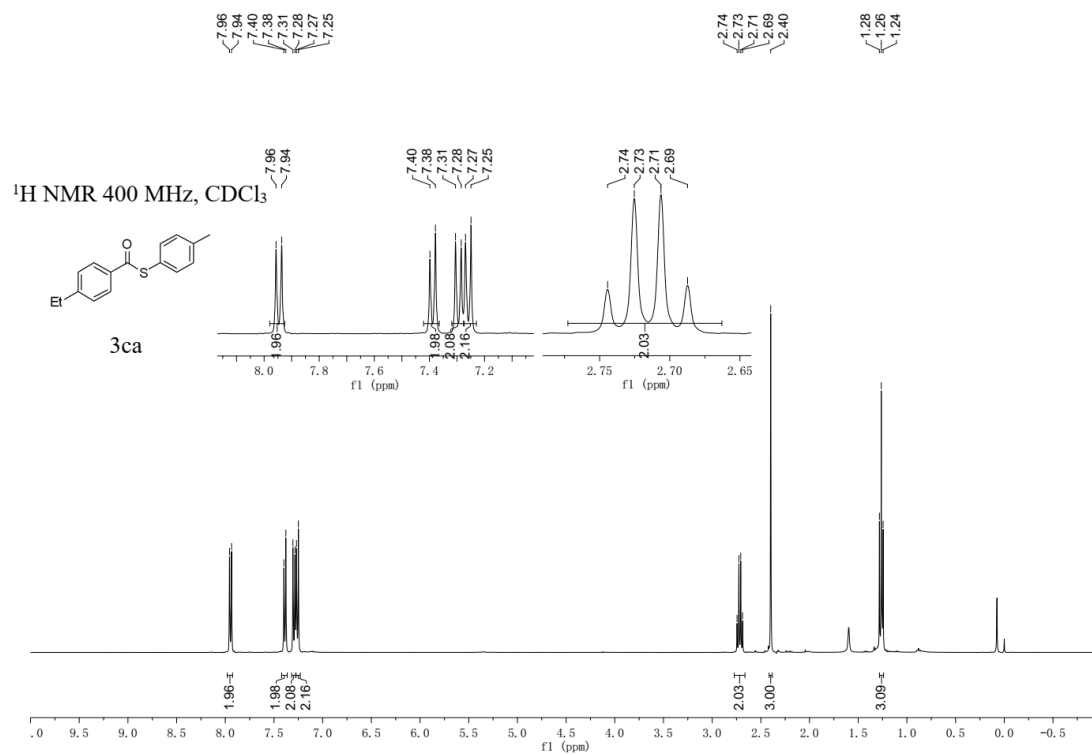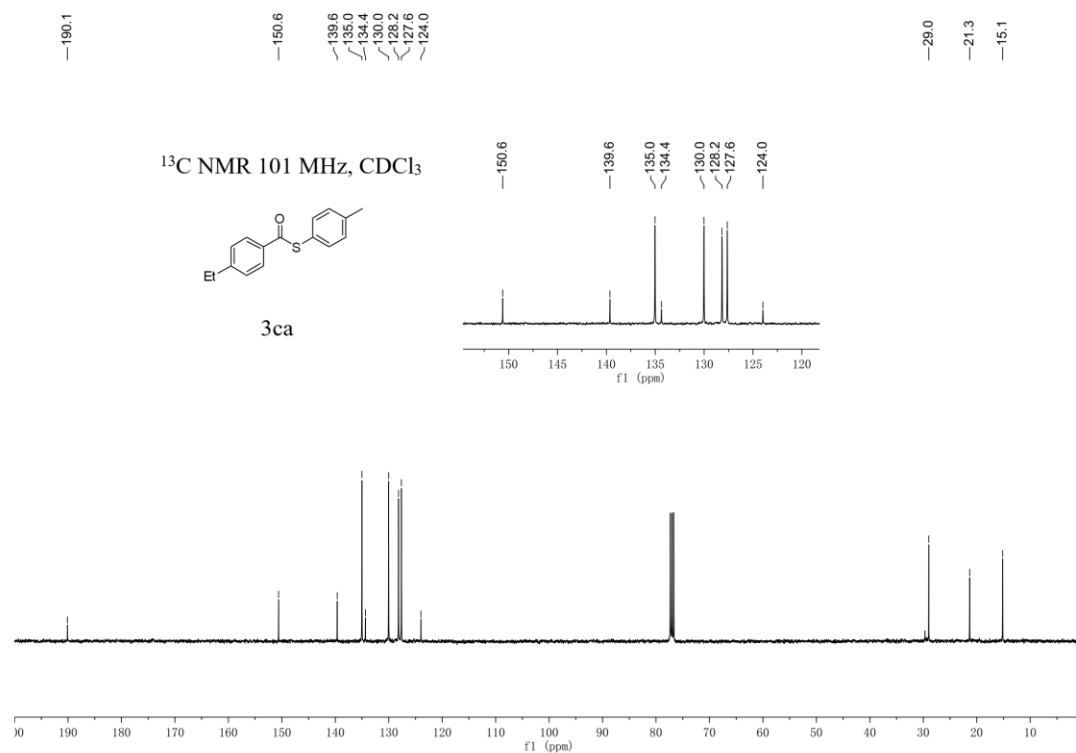

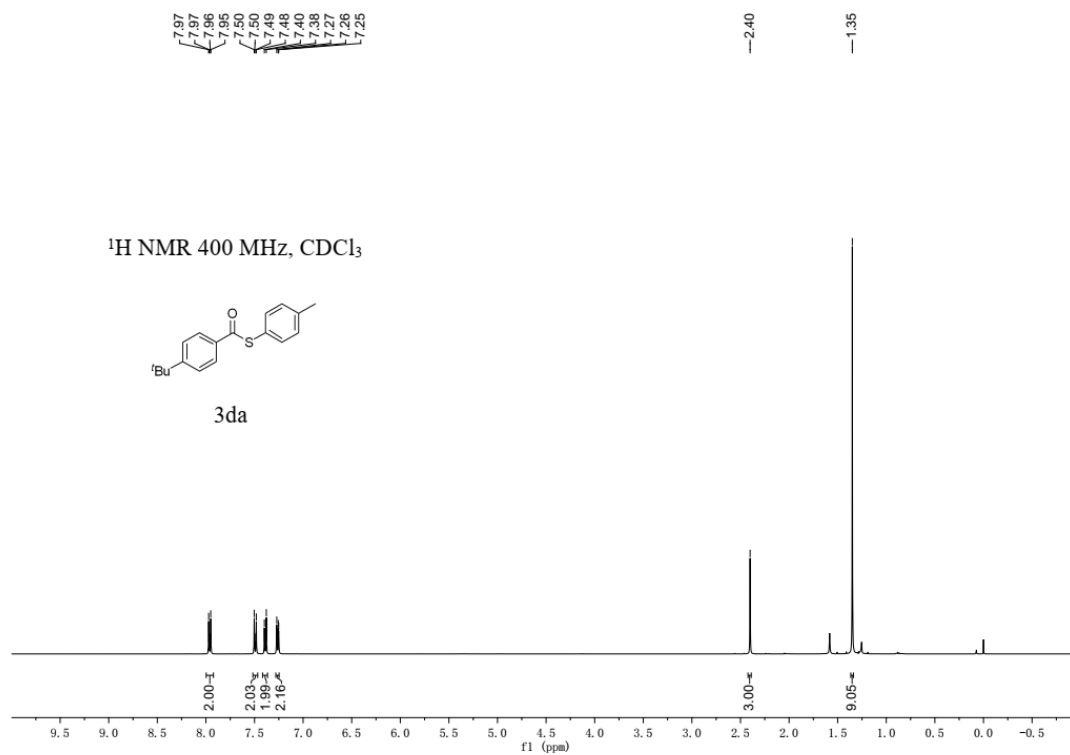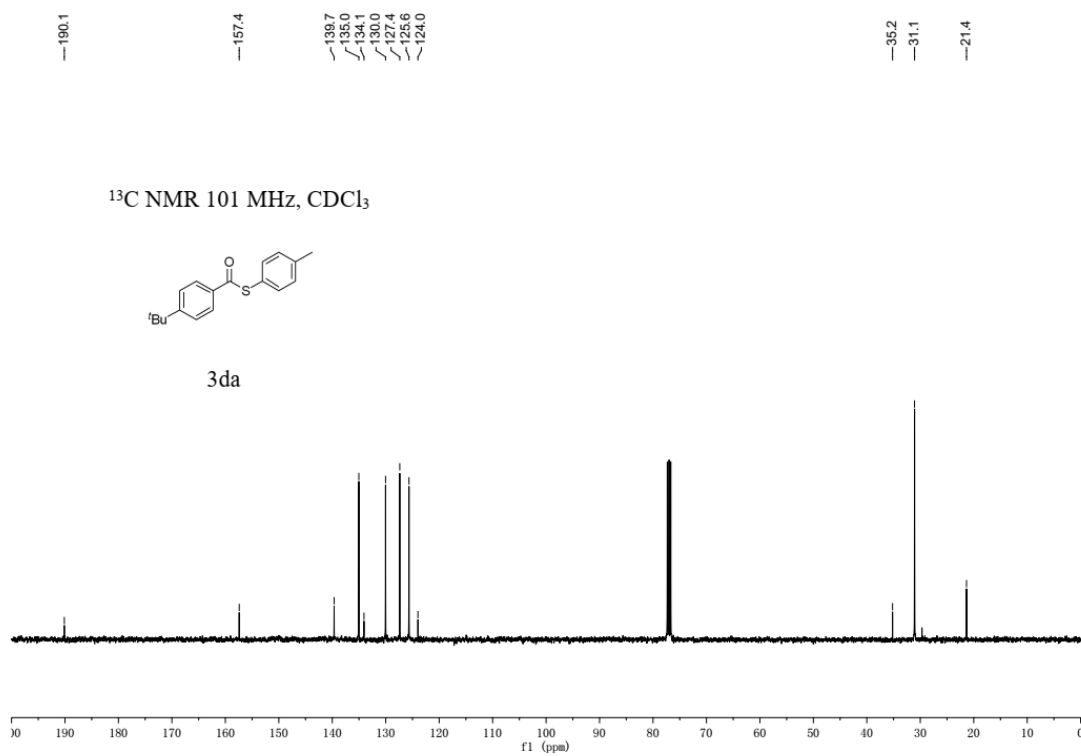

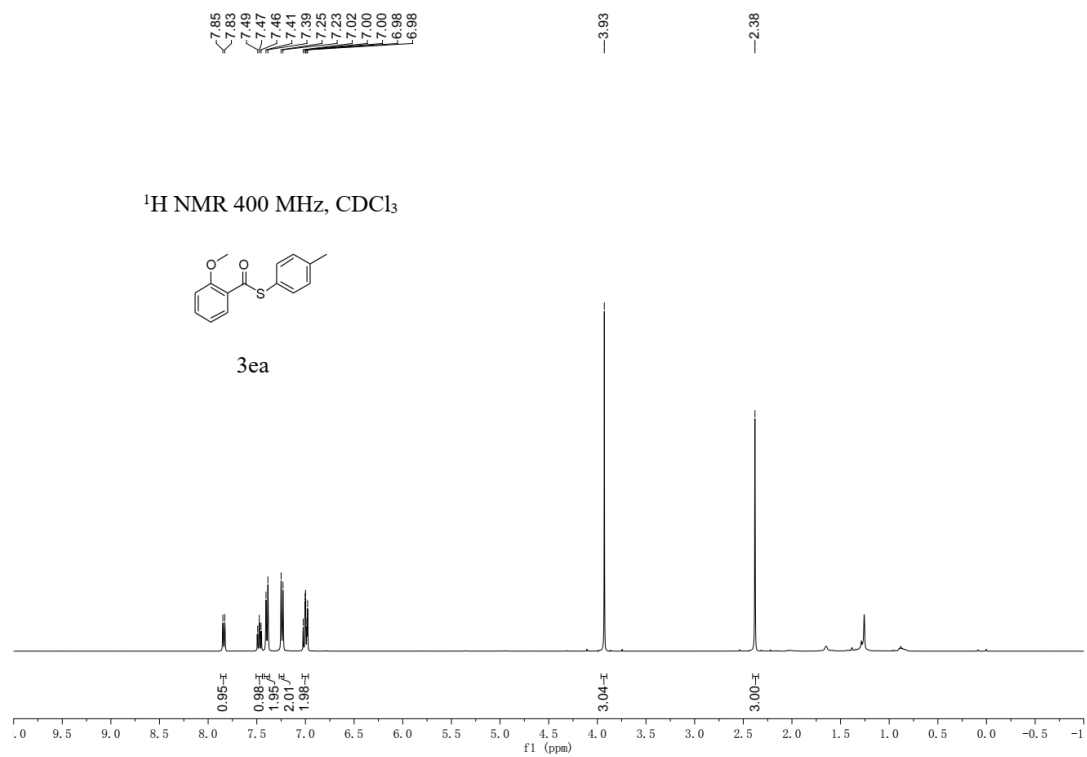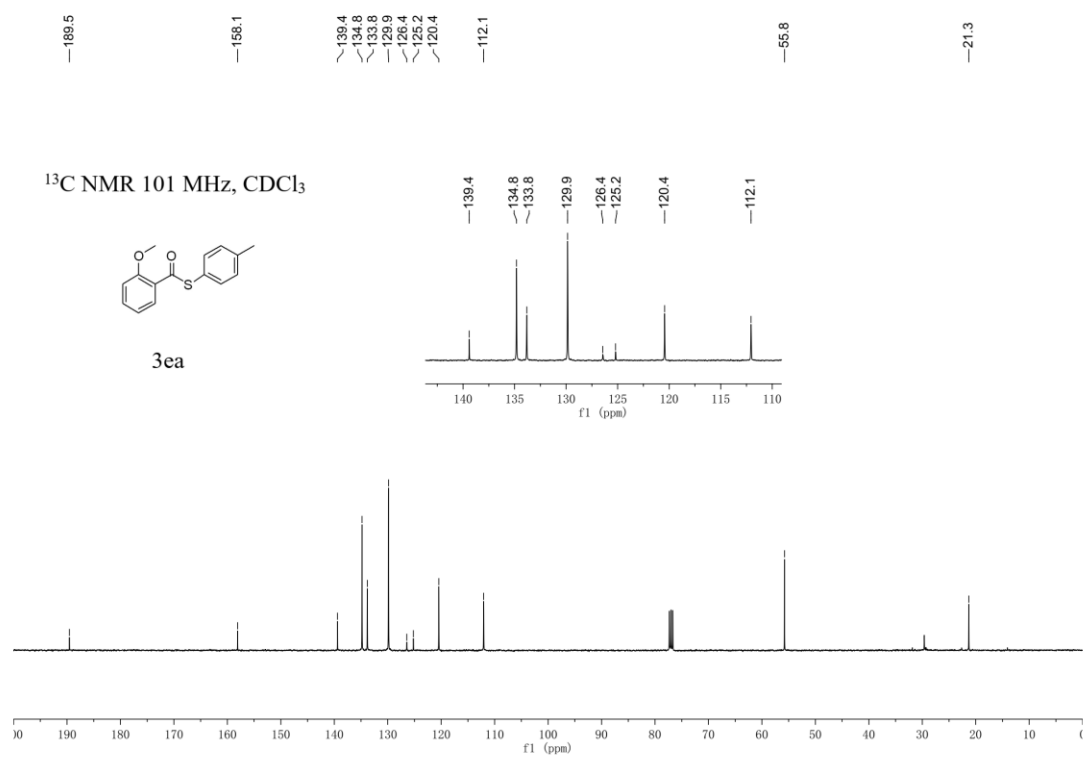

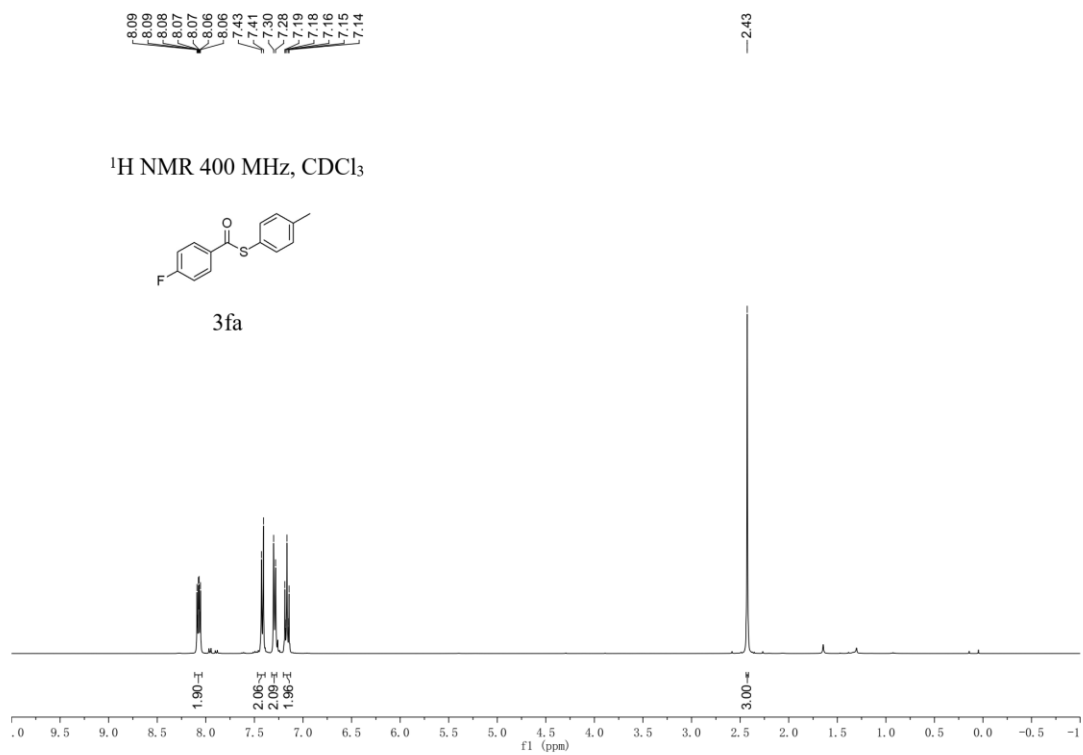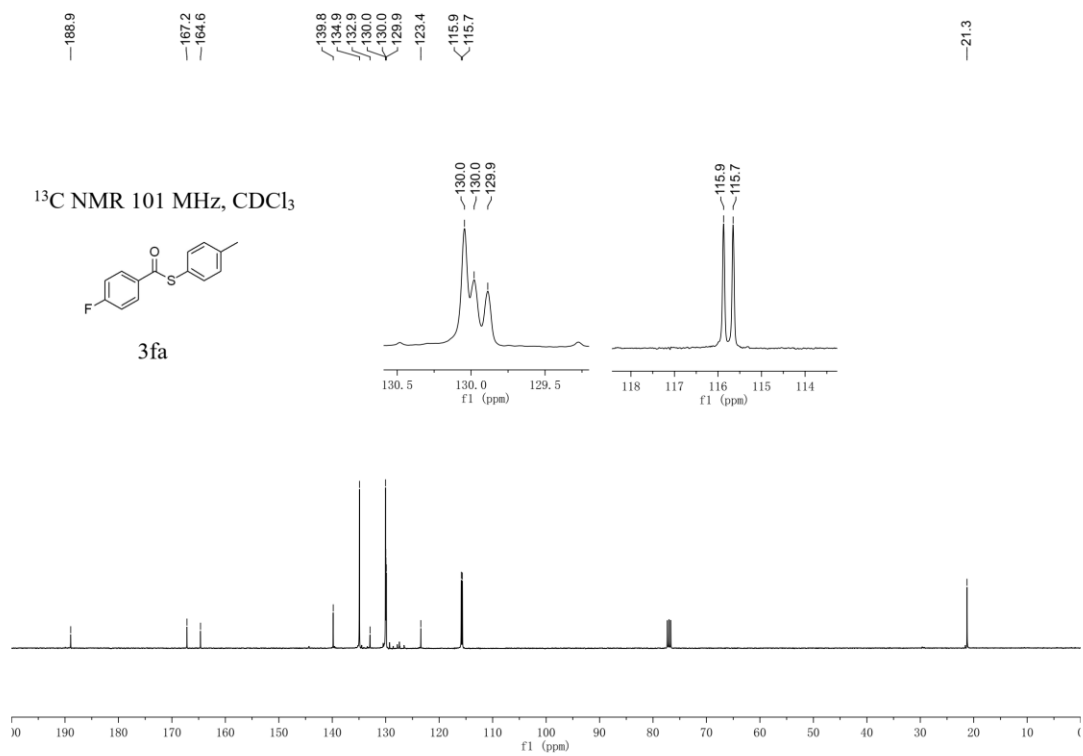



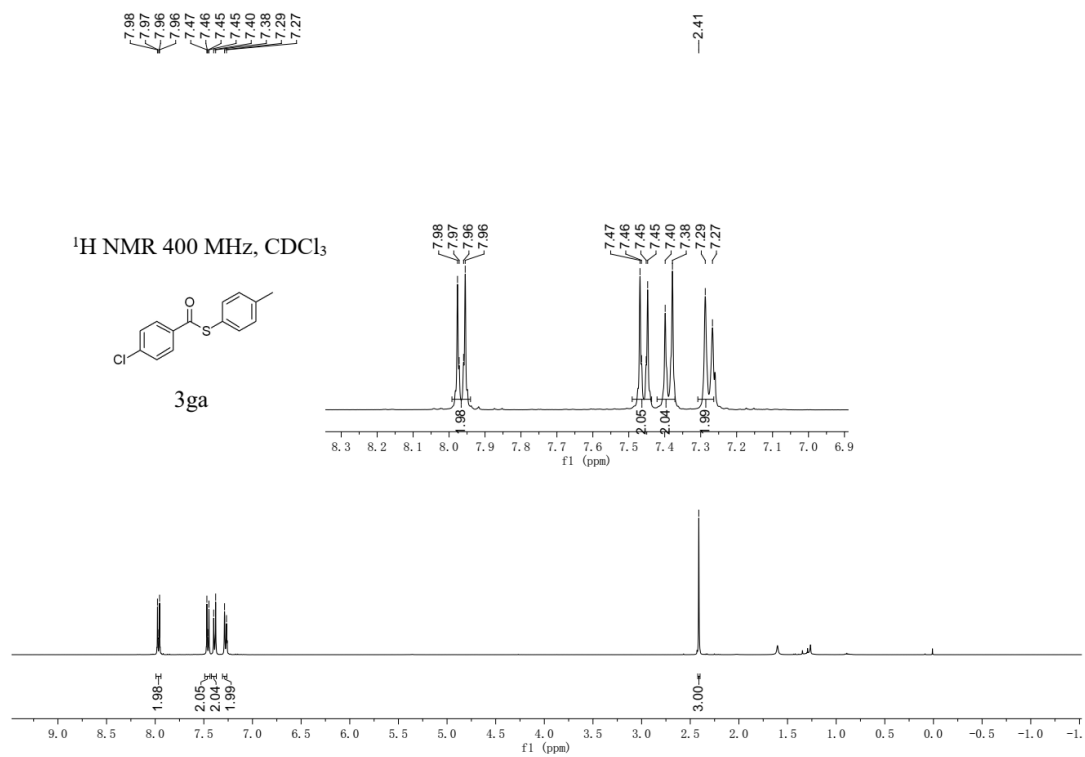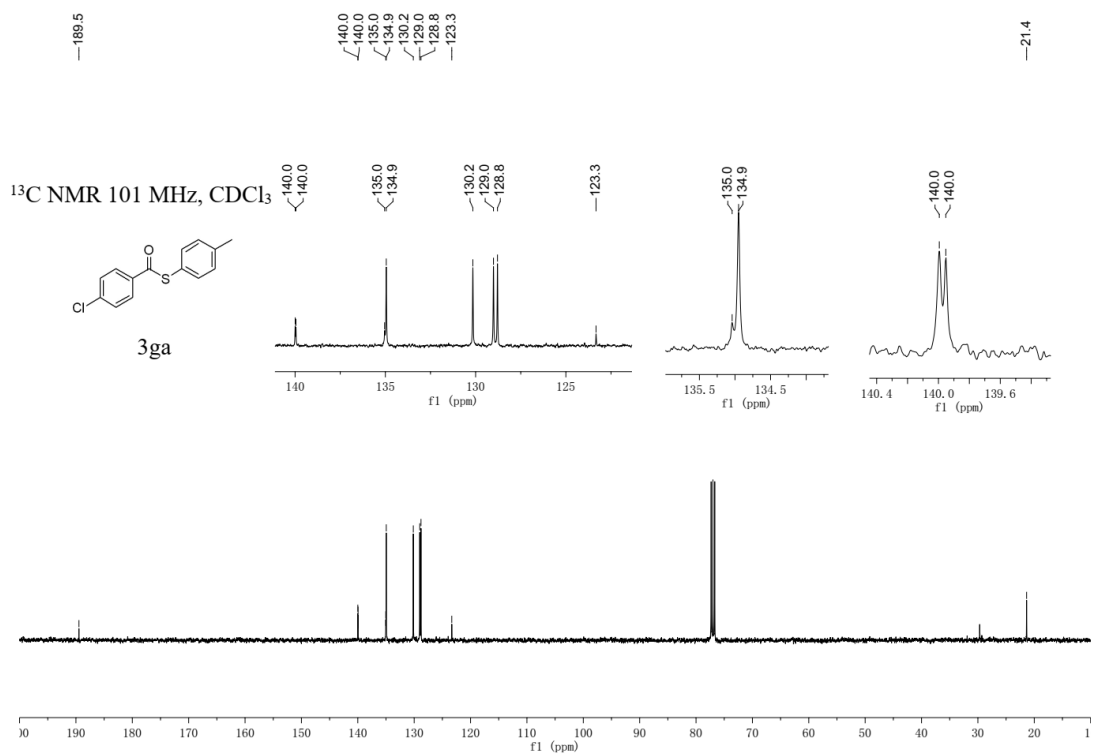

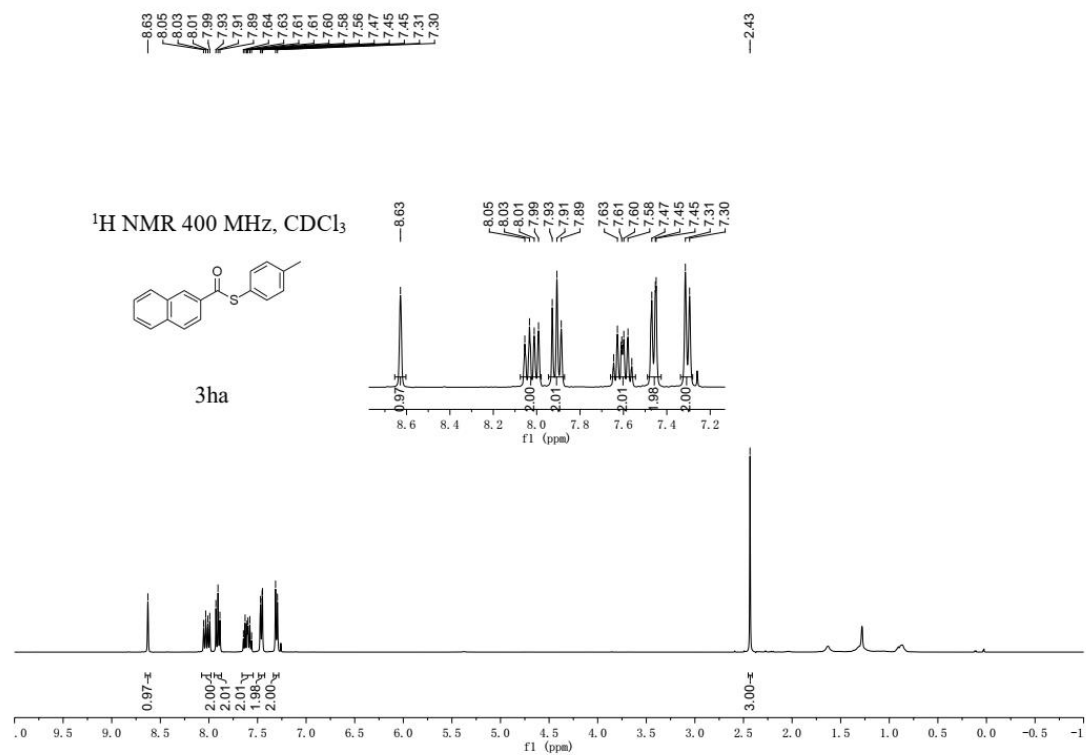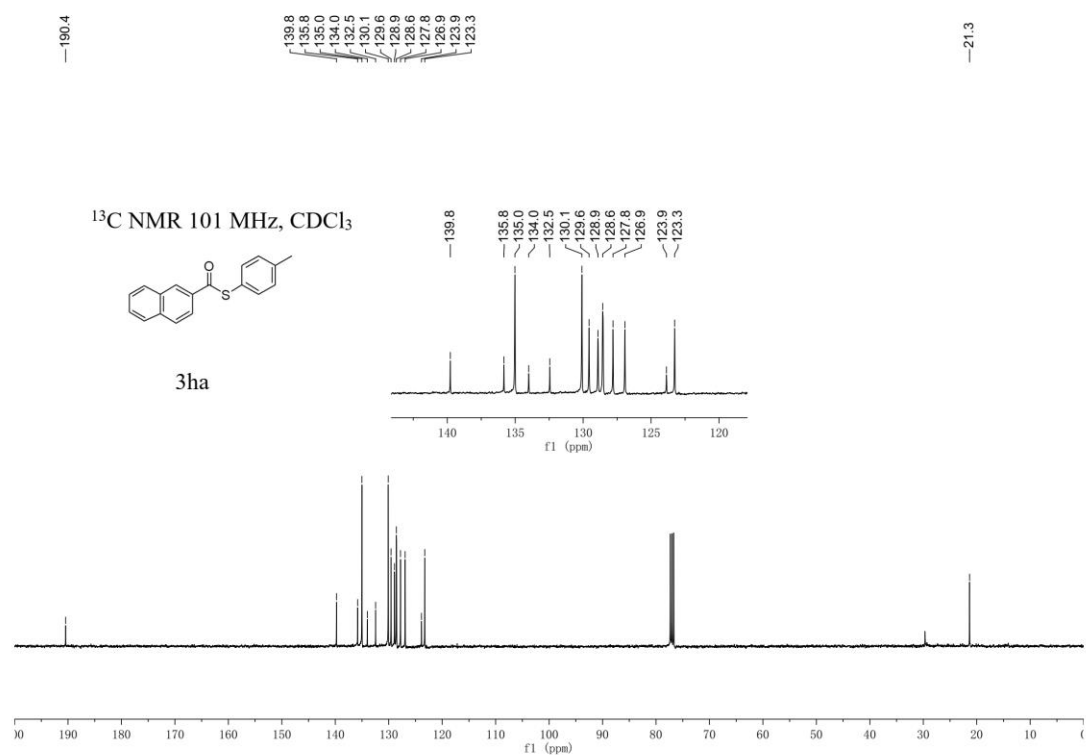

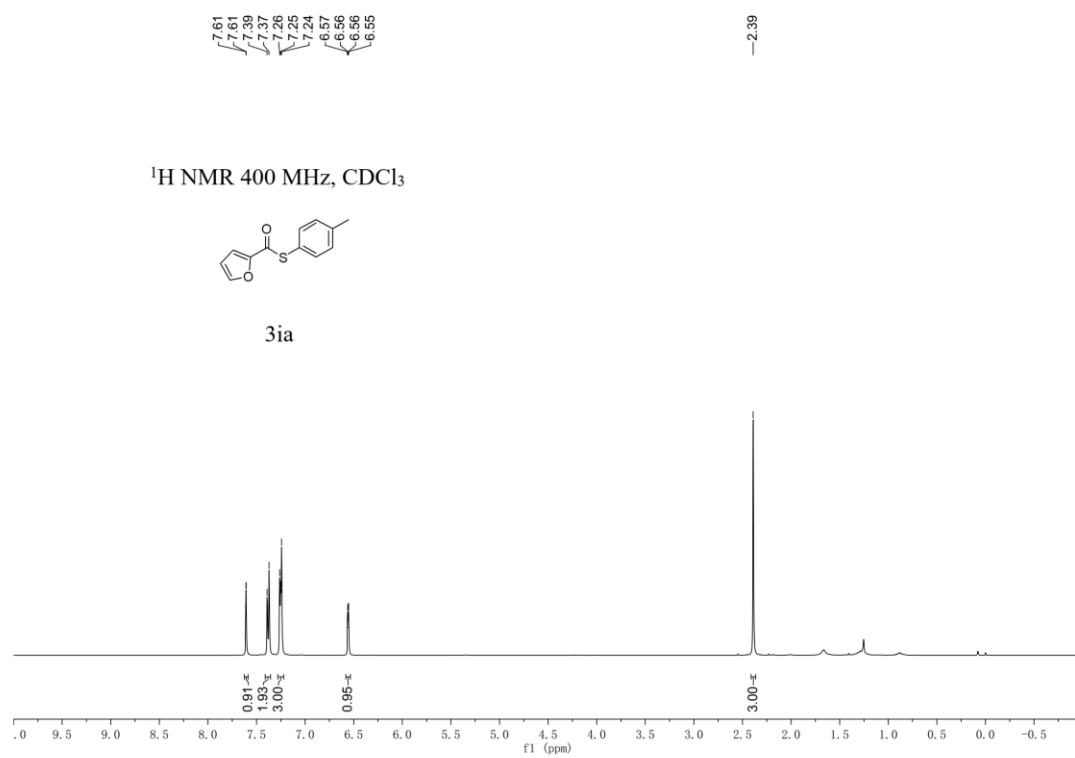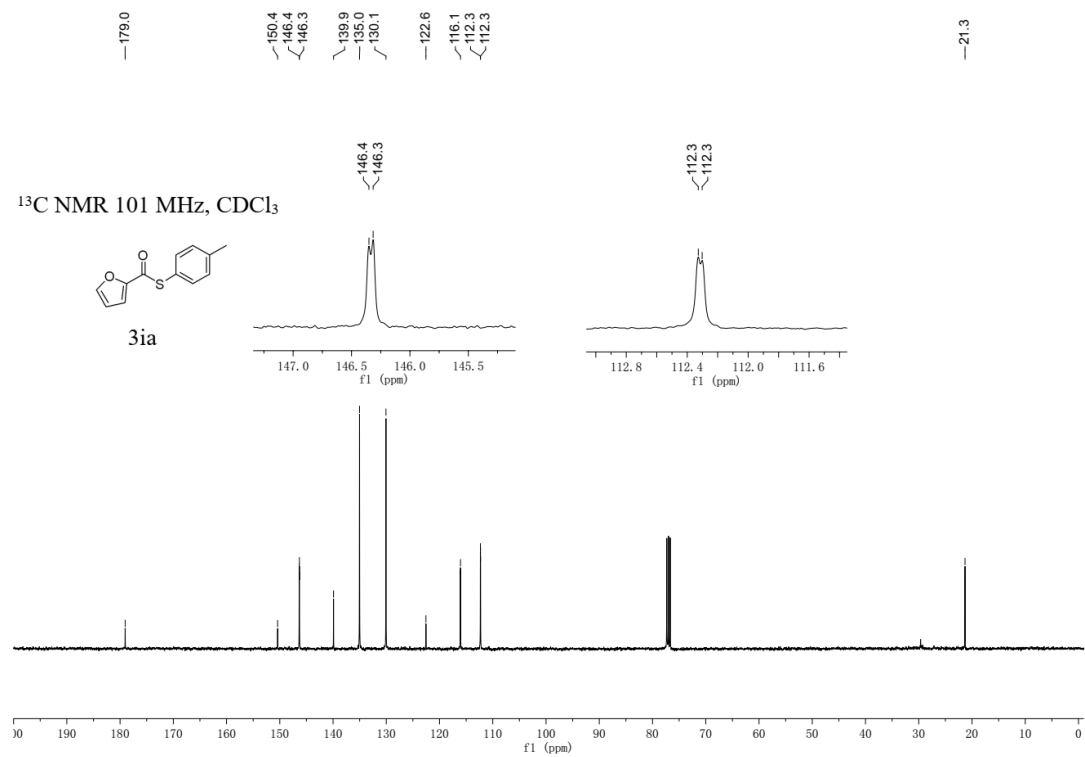

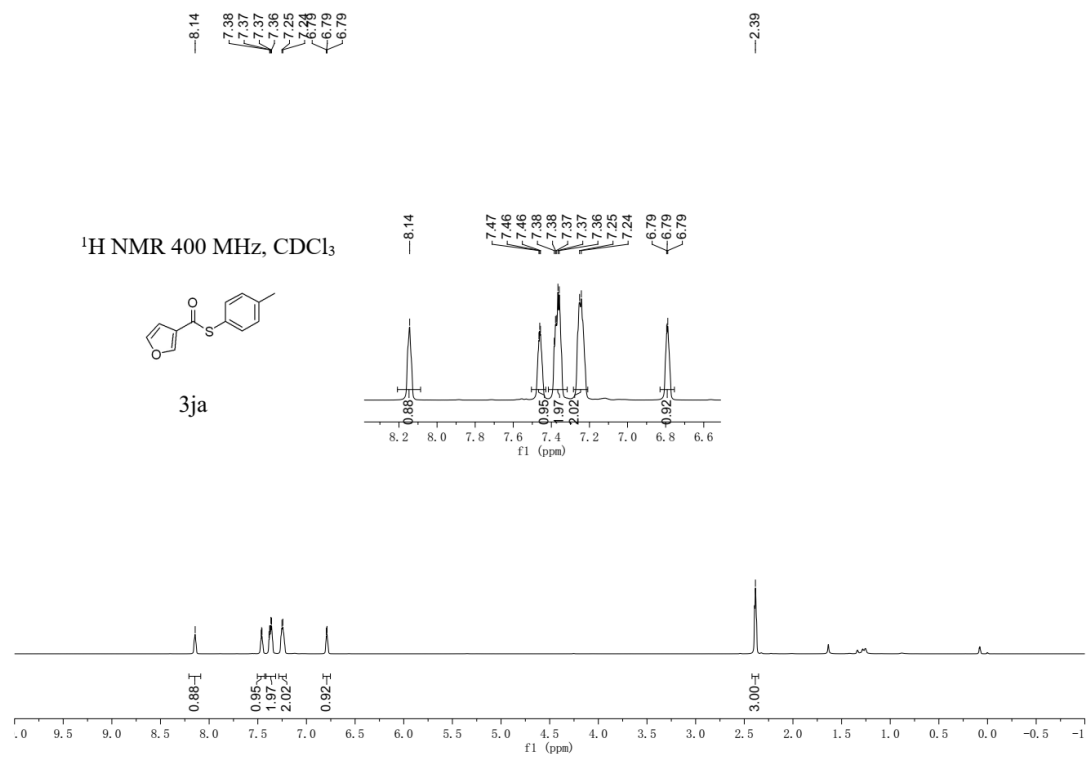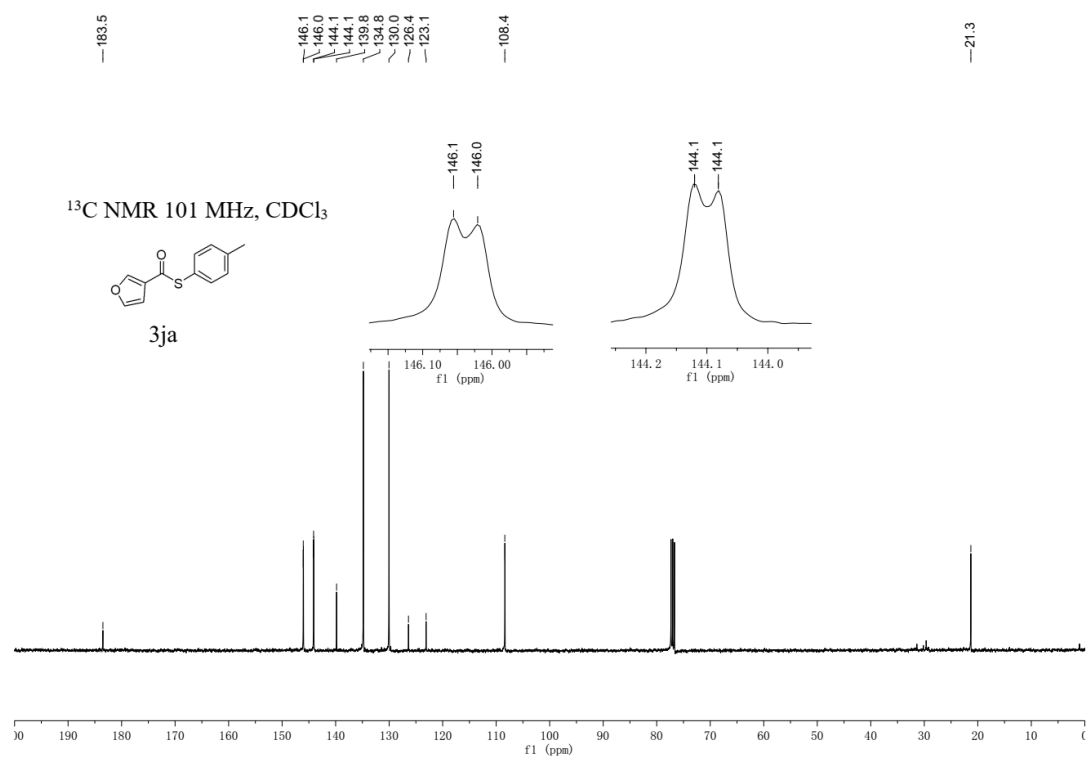

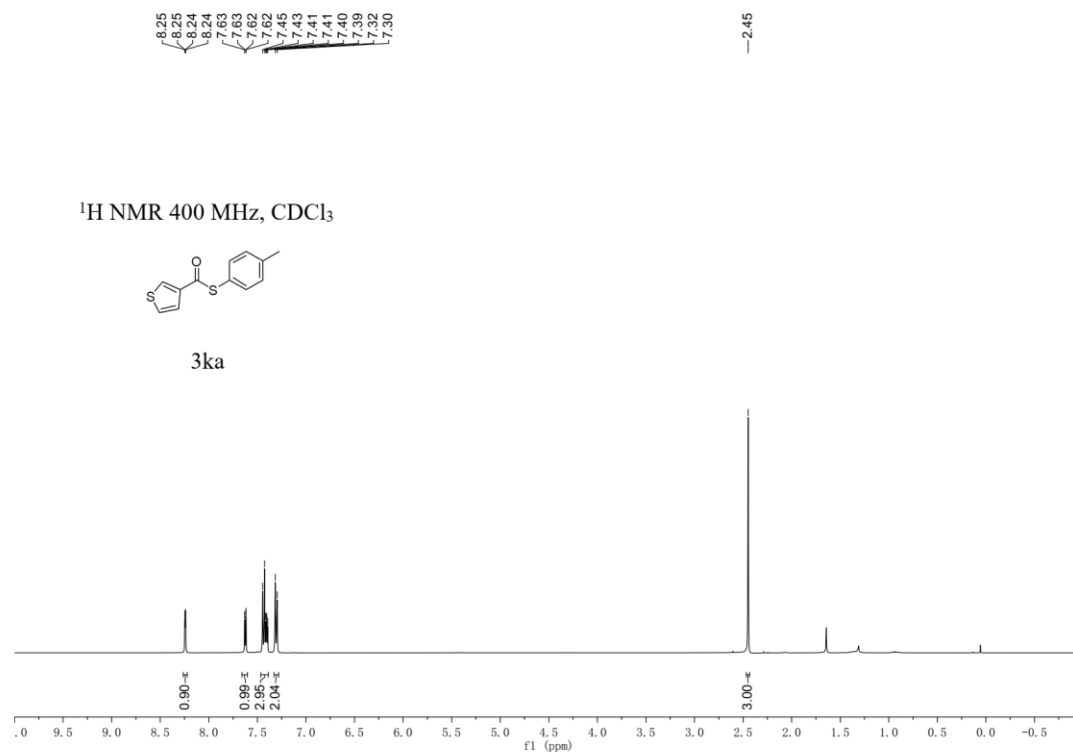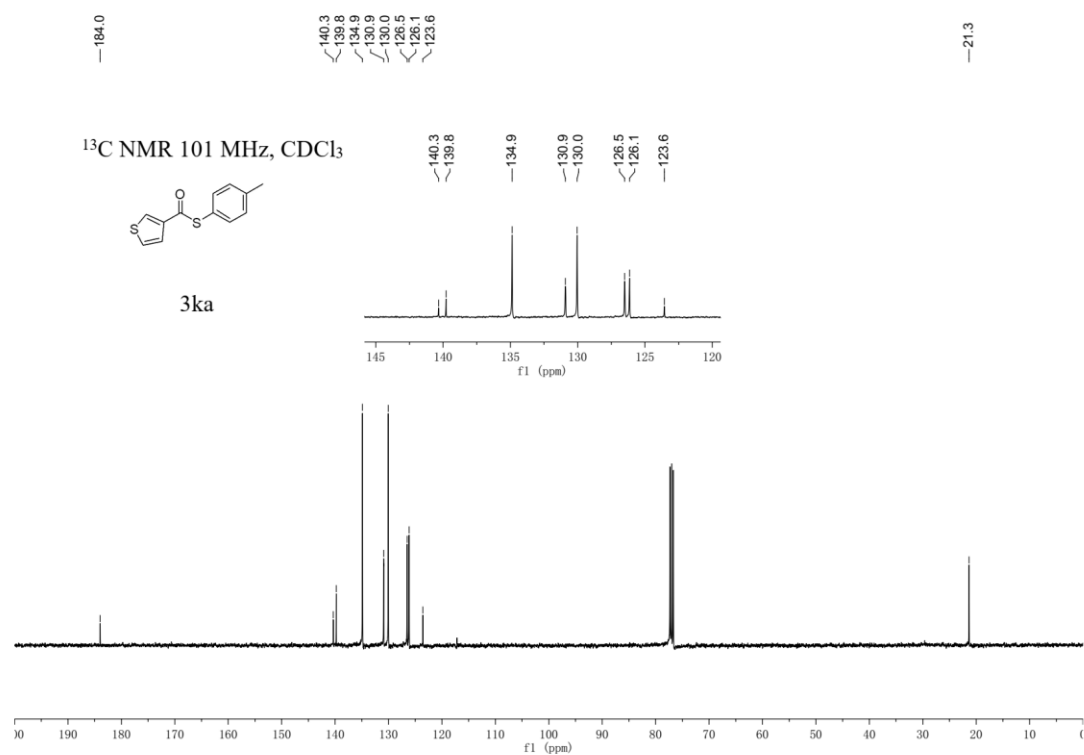

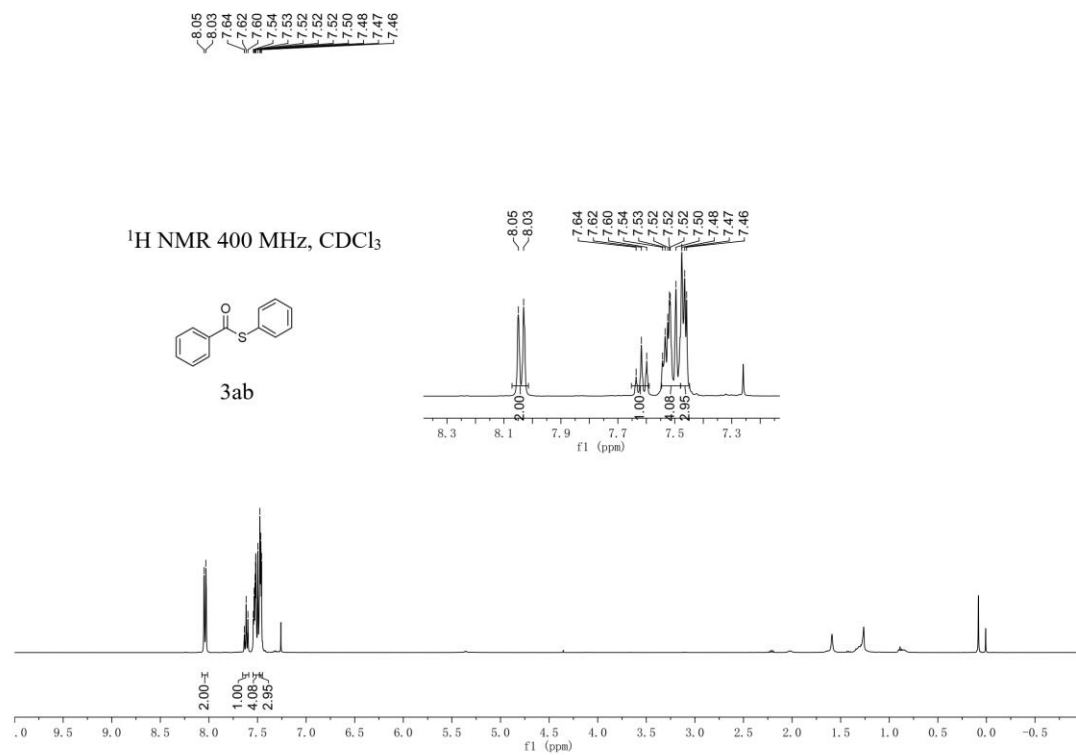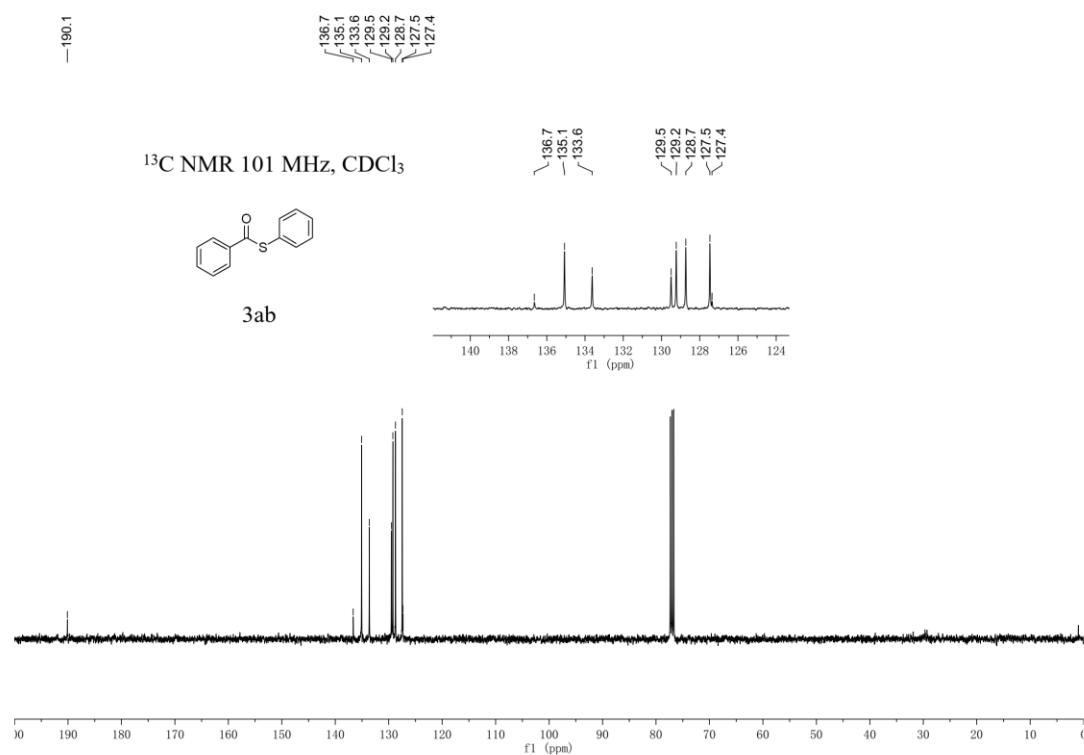

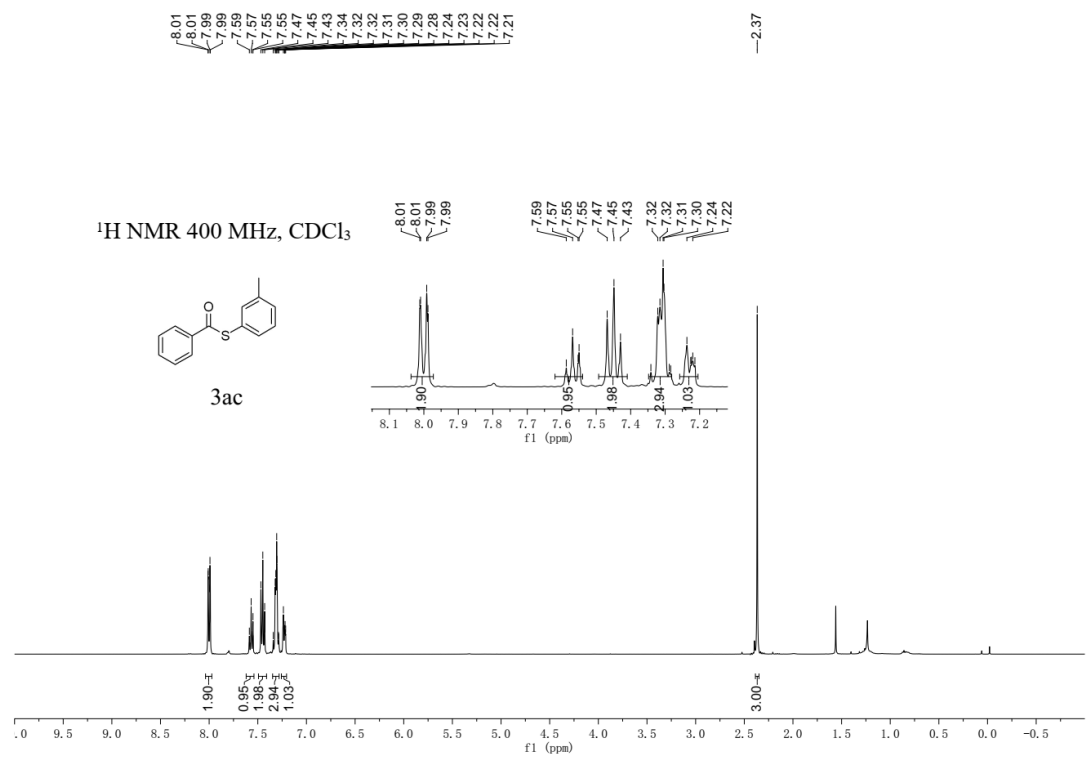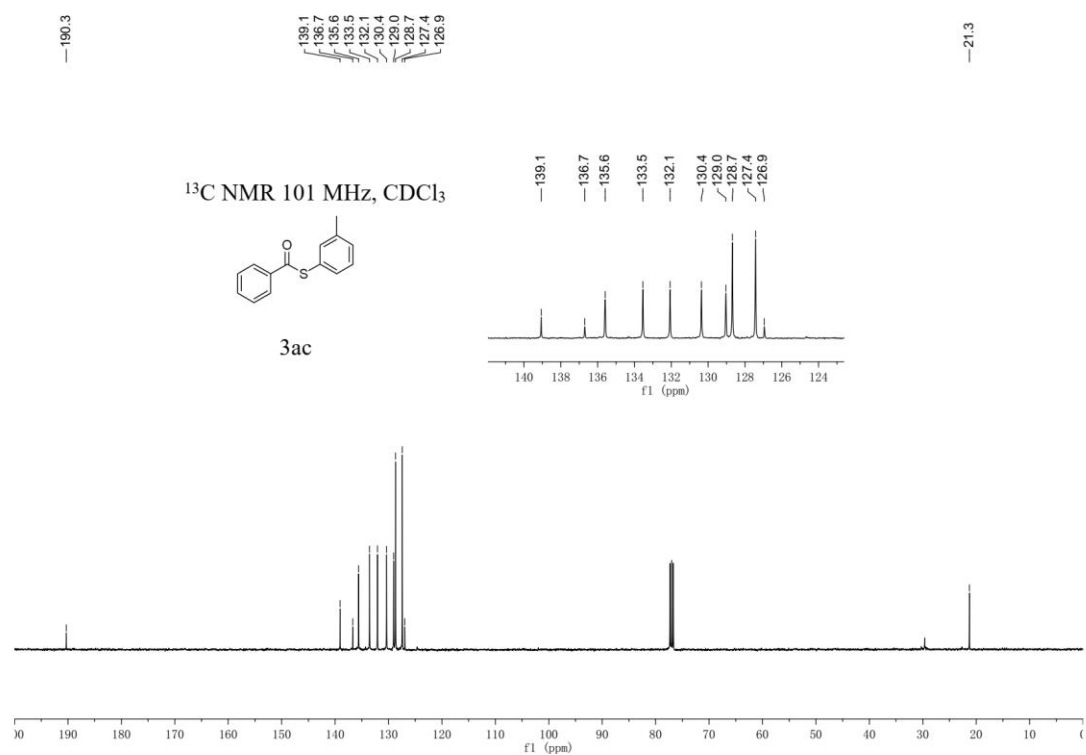

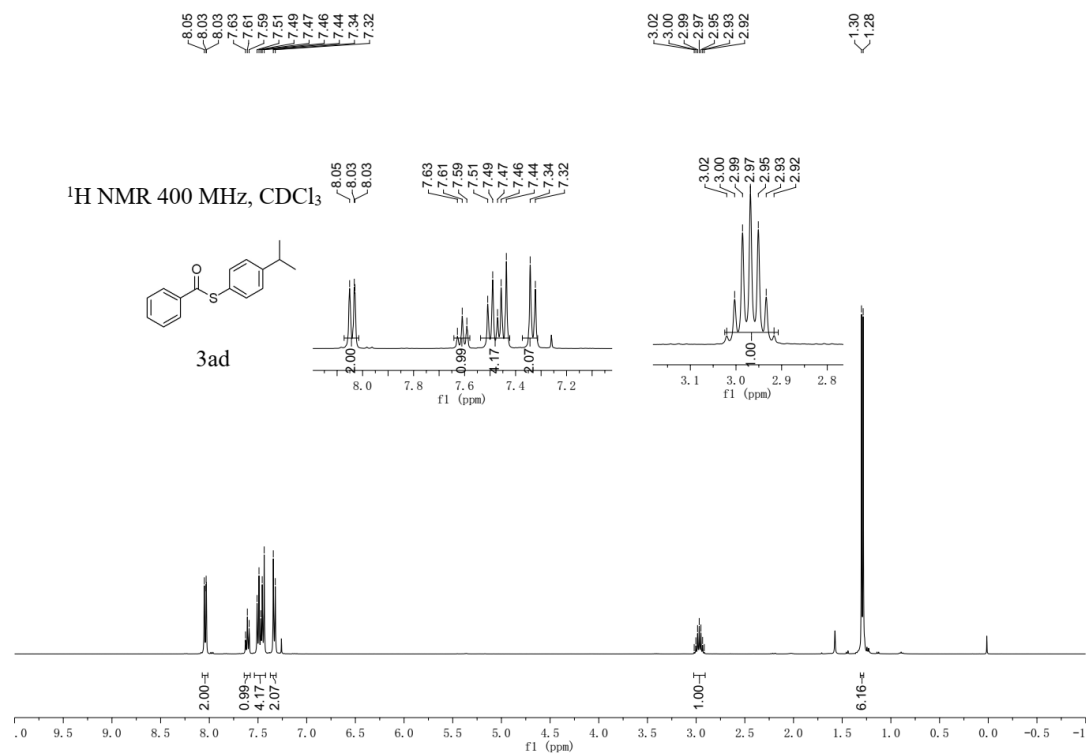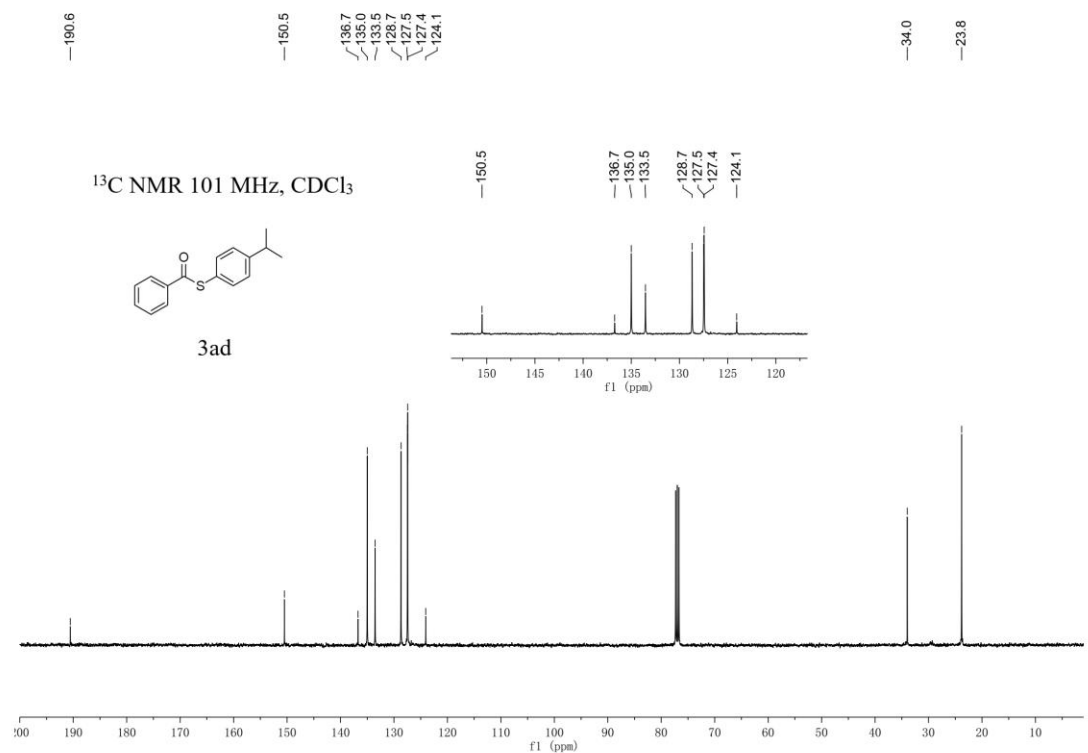



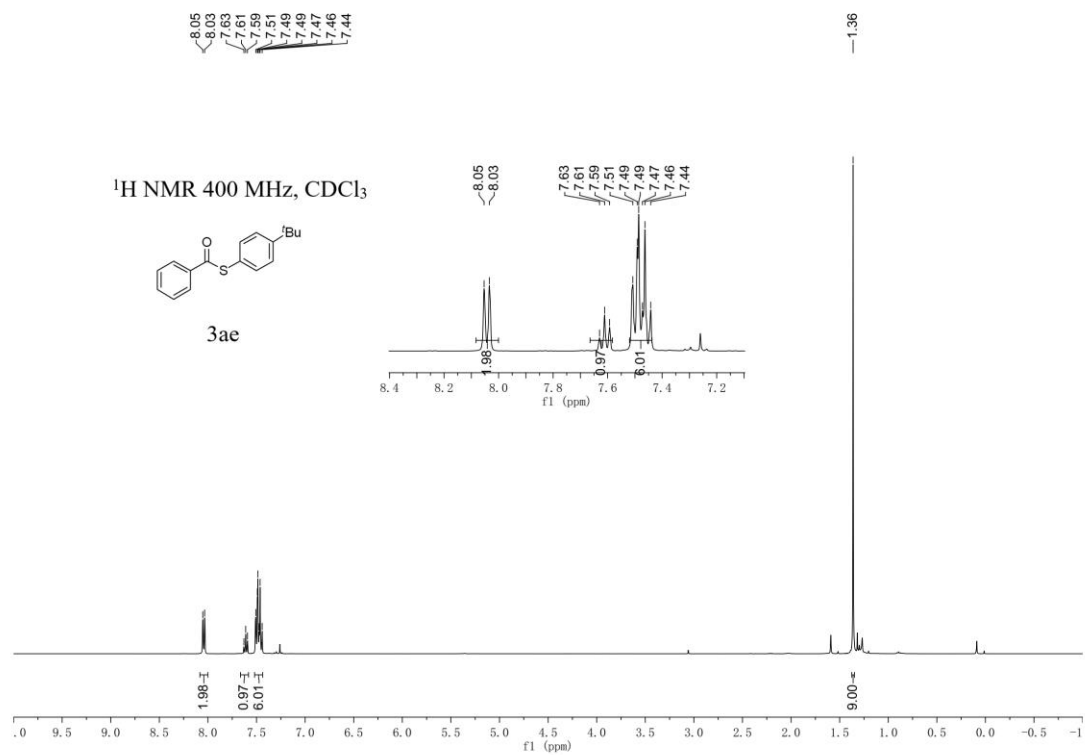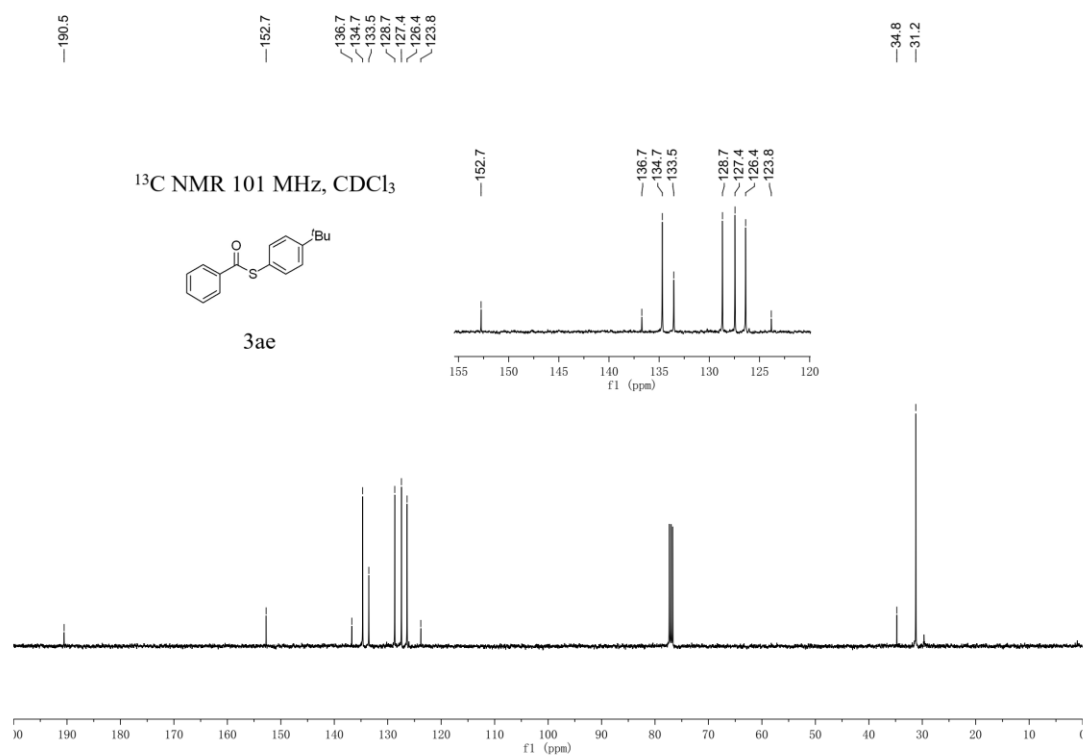

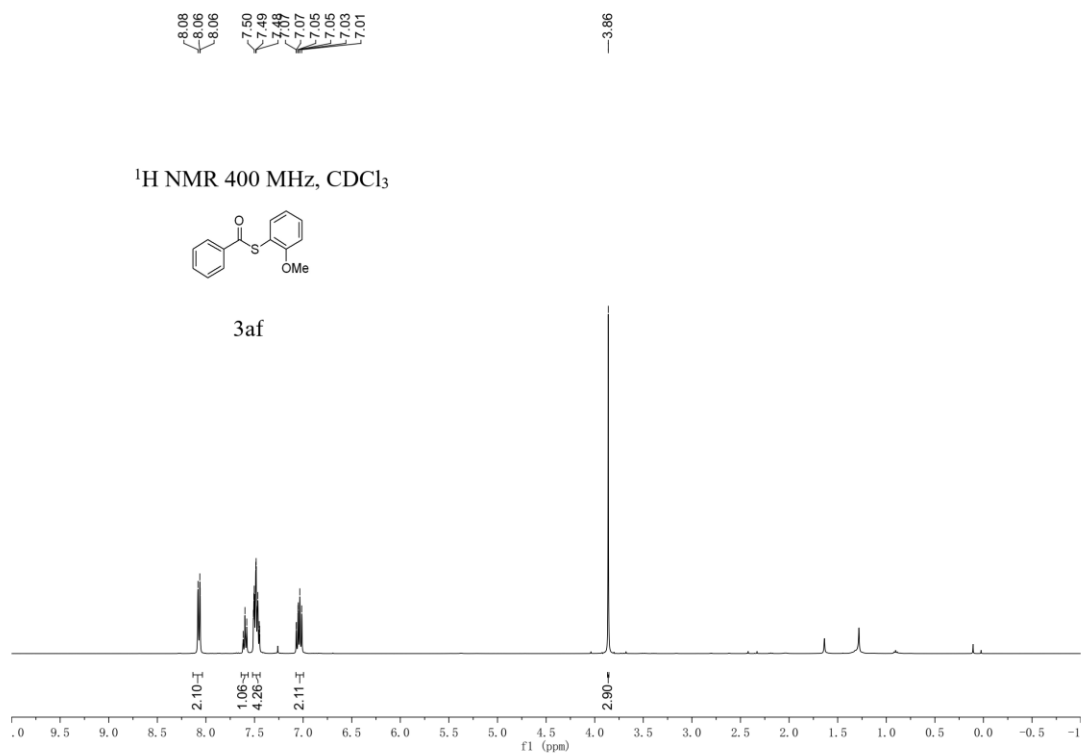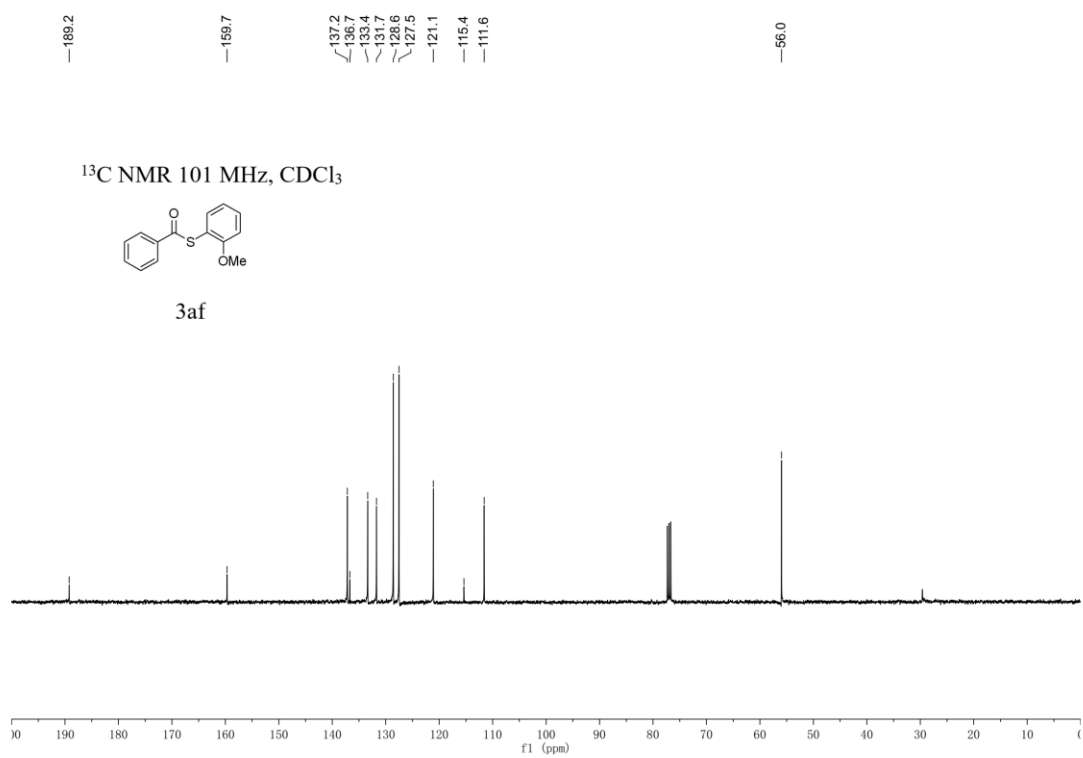

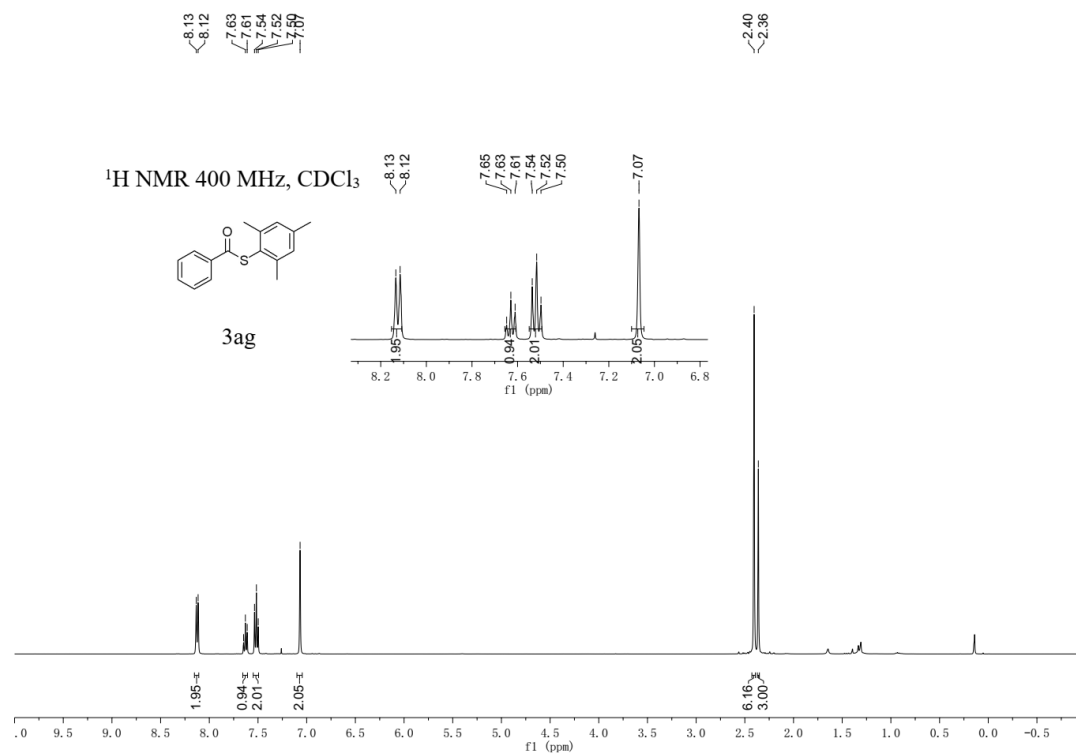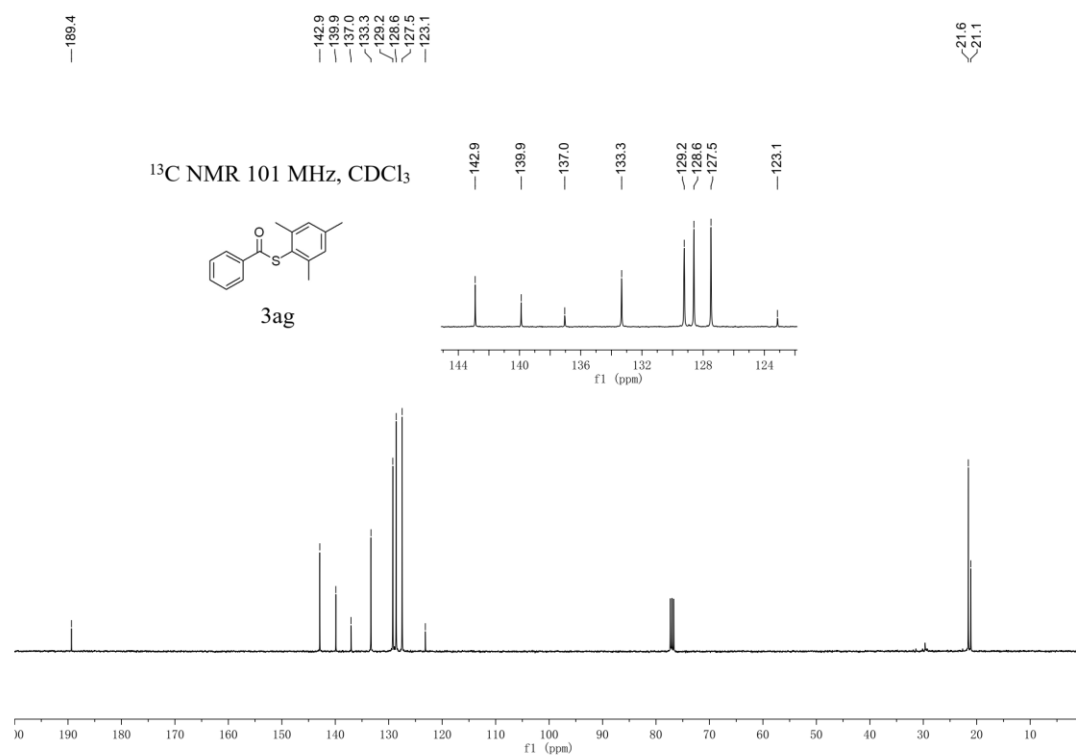

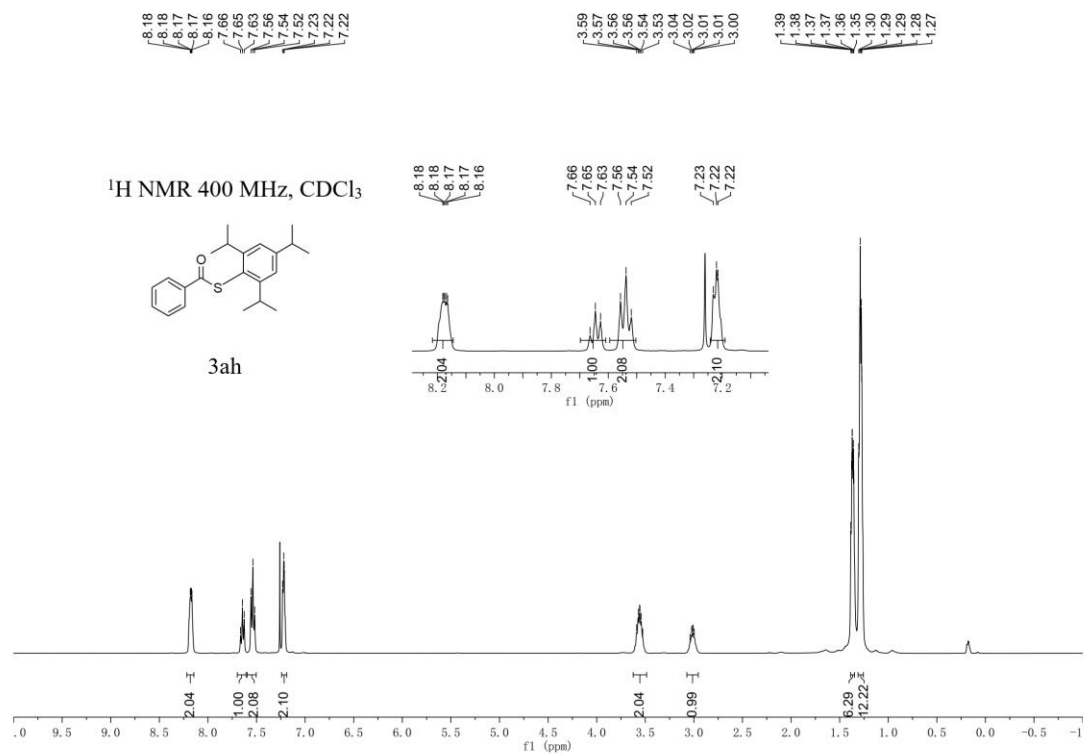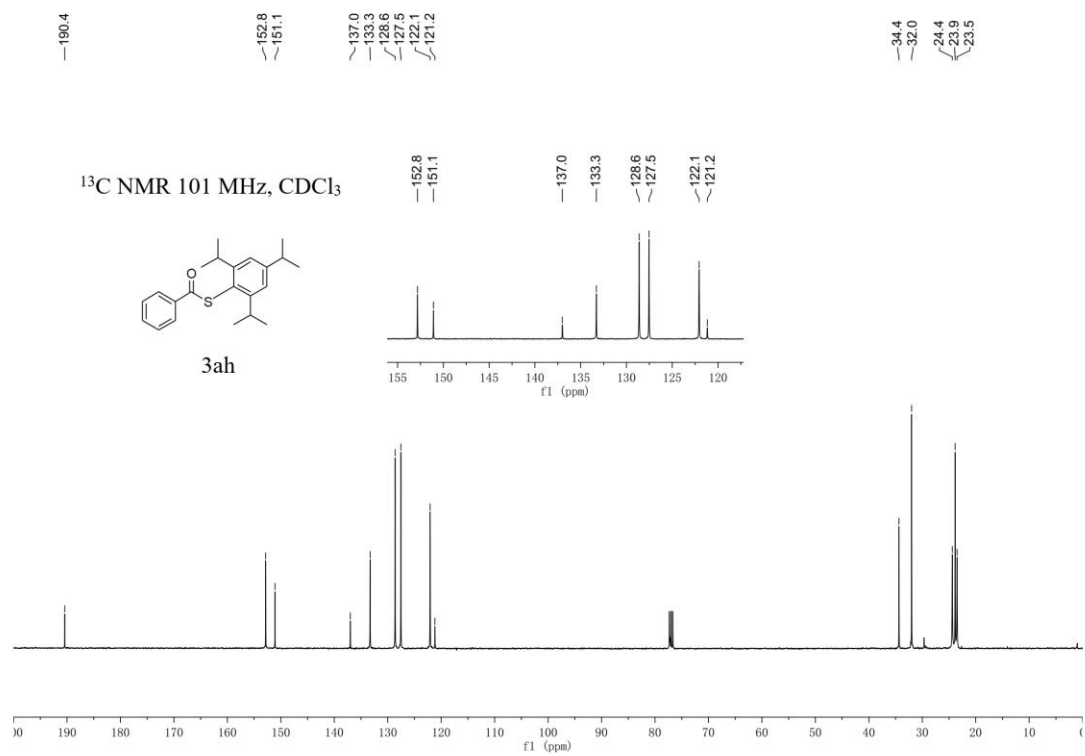

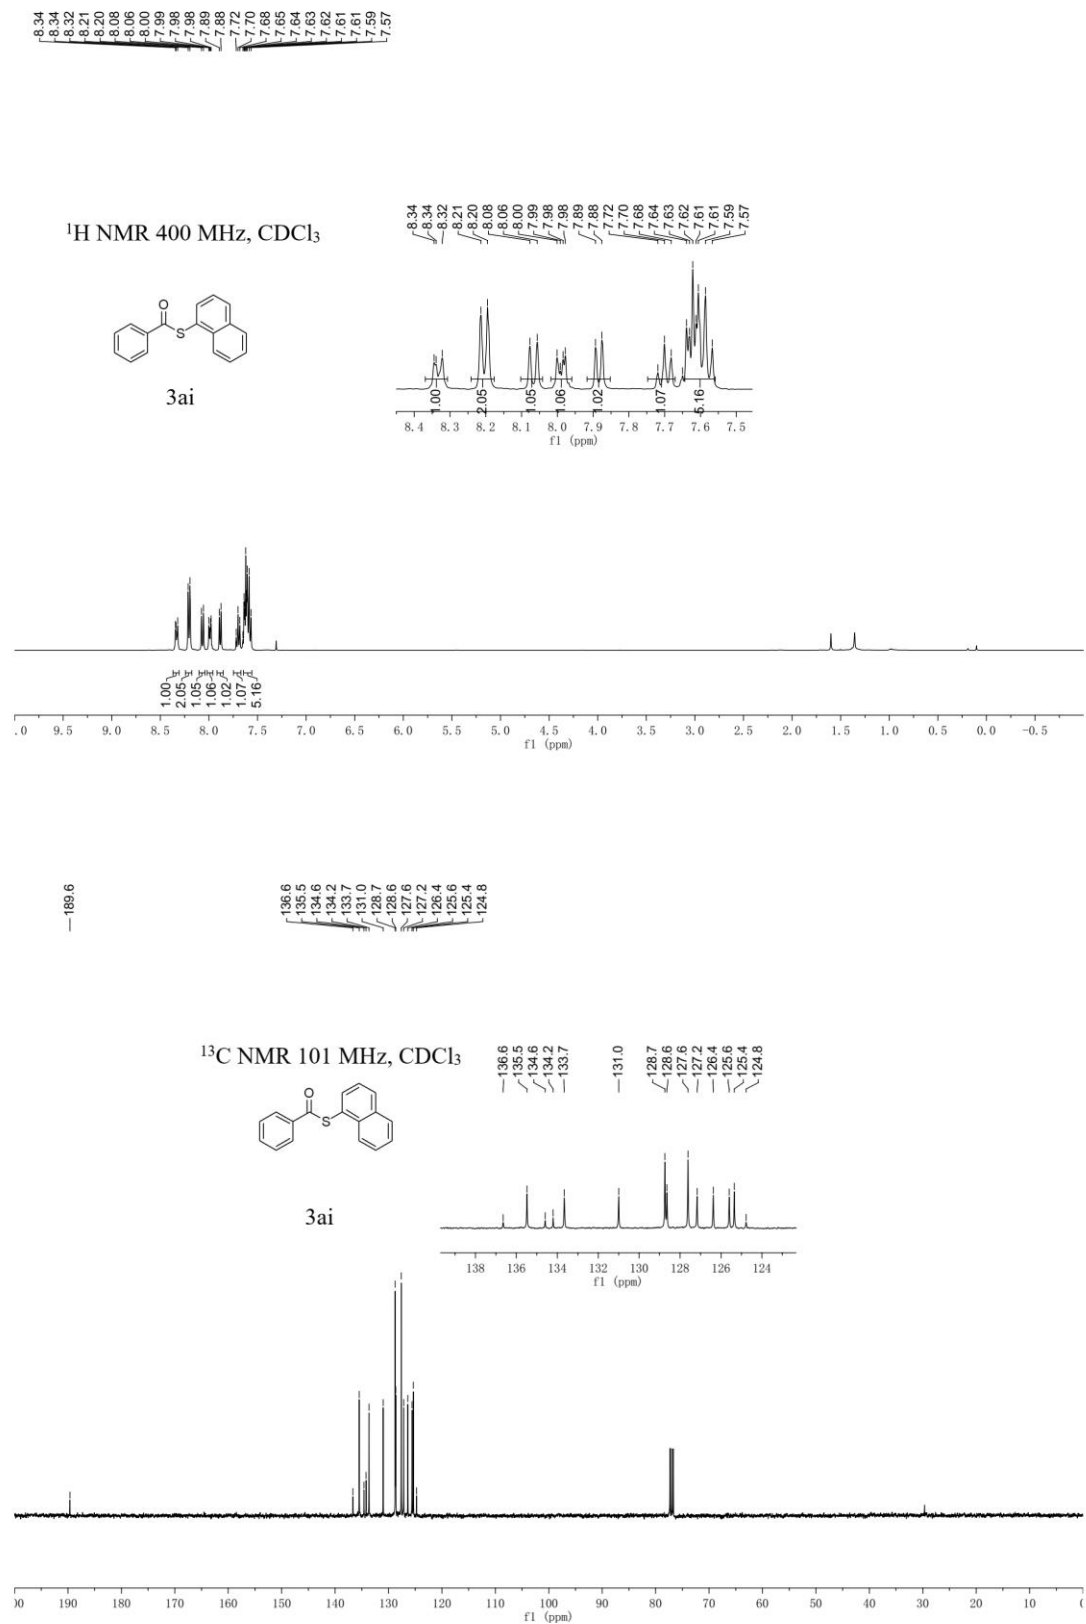

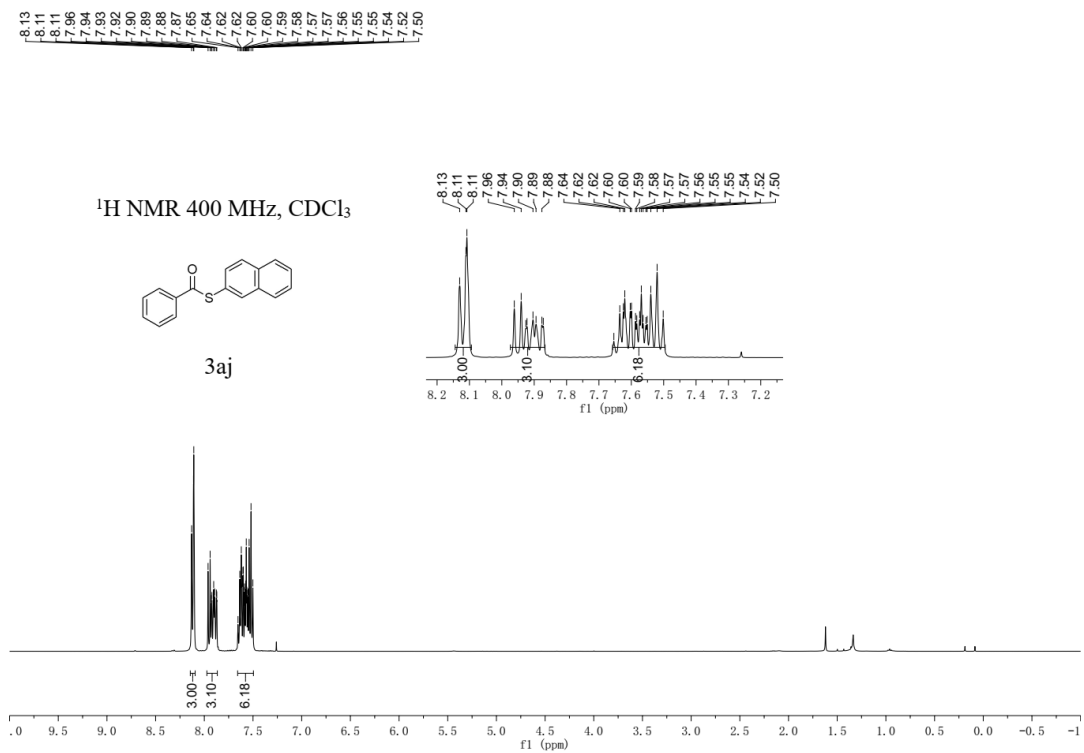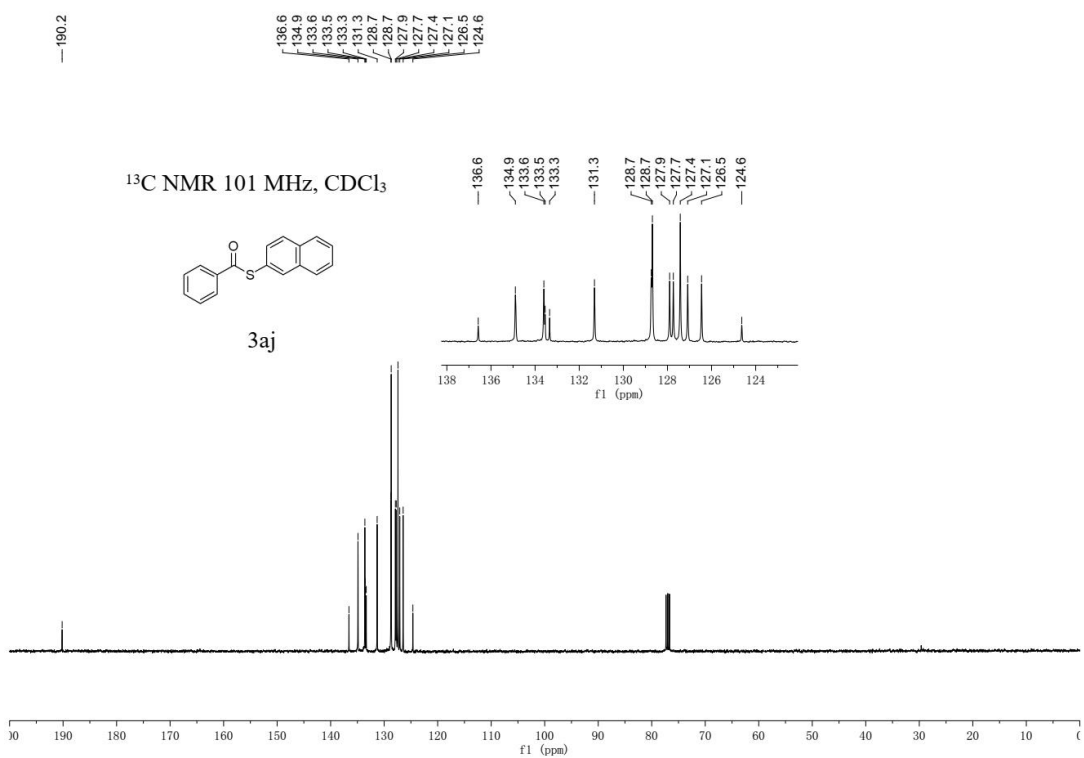

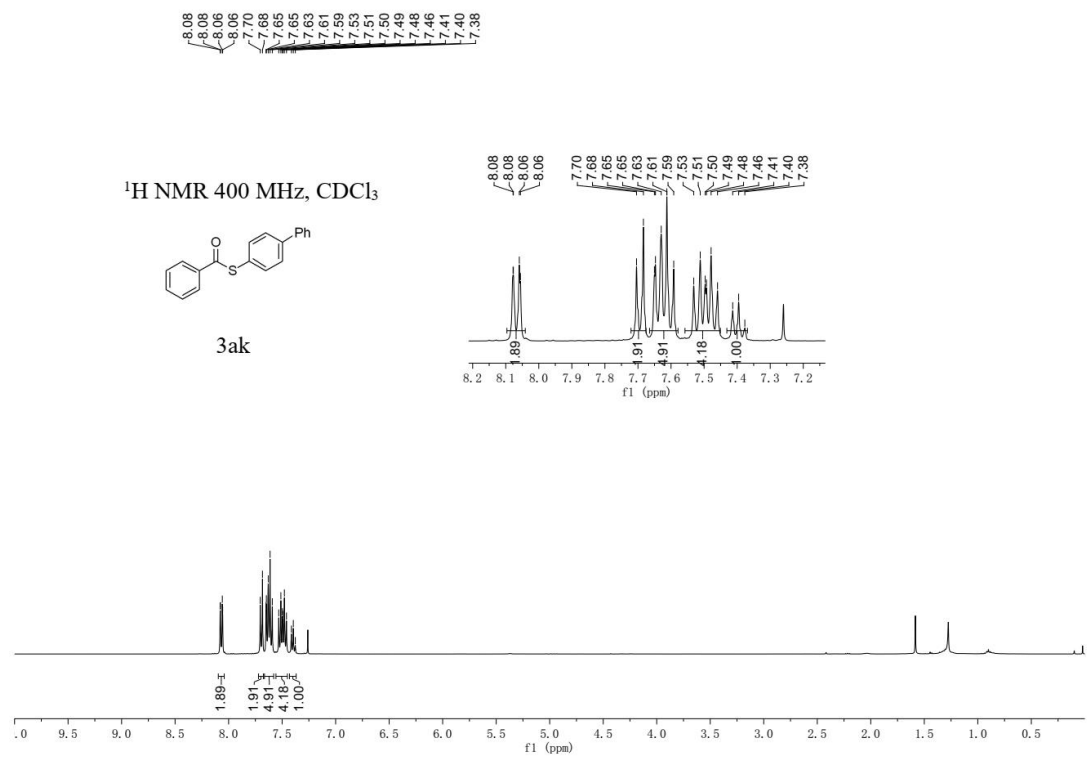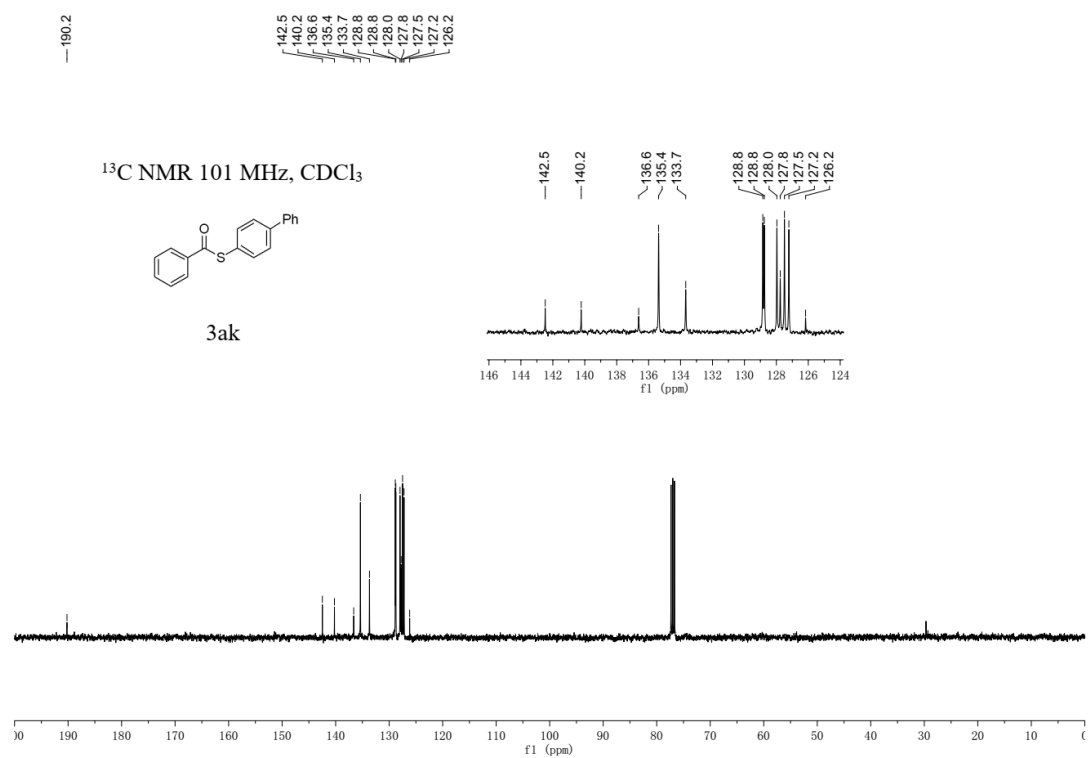

7.97  
7.95  
7.57  
7.55  
7.53  
7.46  
7.44

3.10  
3.09  
3.07  
3.05

1.37  
1.35  
1.33

$^1\text{H}$  NMR 400 MHz,  $\text{CDCl}_3$

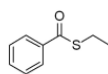

3al

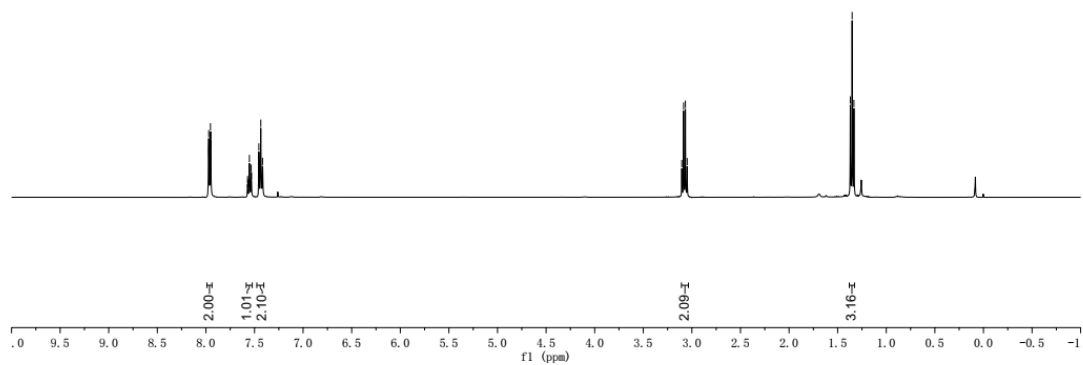

192.0

137.2  
133.2  
128.5  
127.1

23.4  
14.7

$^{13}\text{C}$  NMR 101 MHz,  $\text{CDCl}_3$

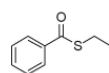

3al

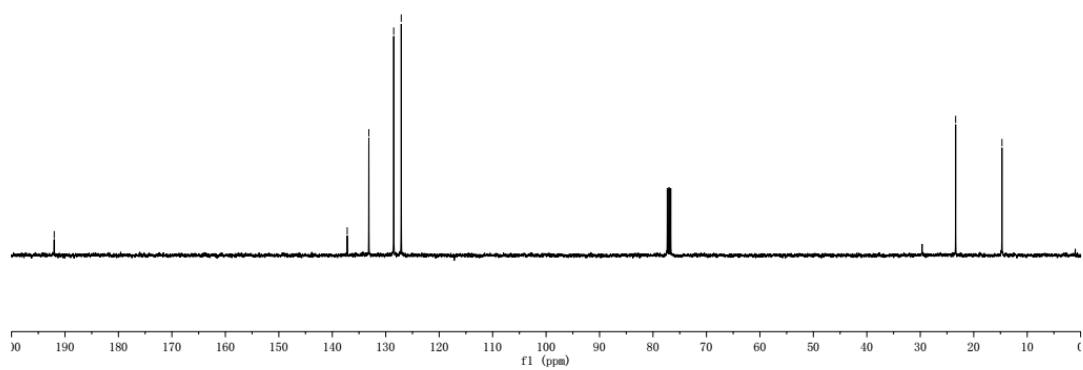



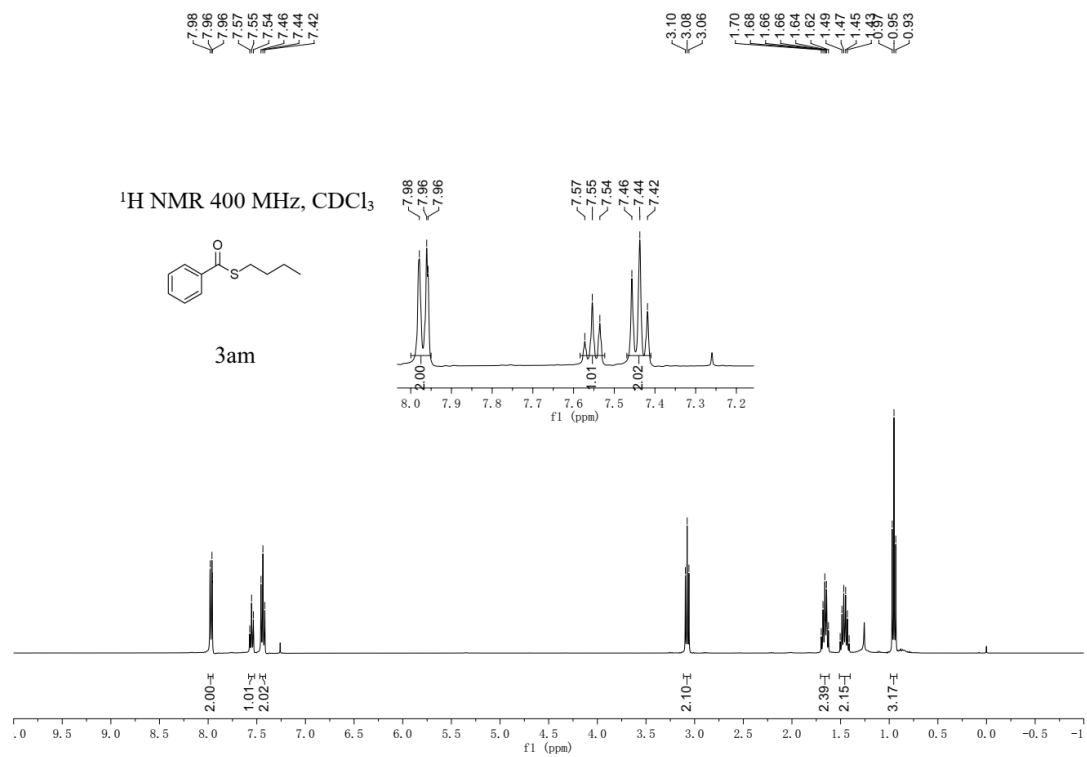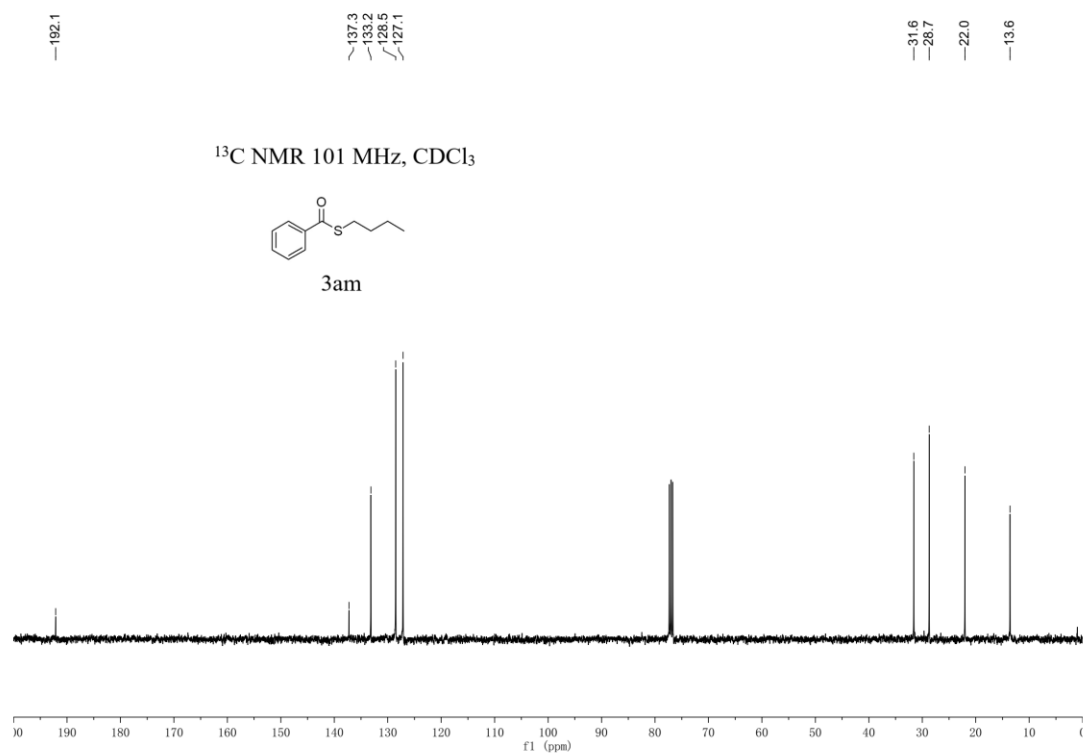

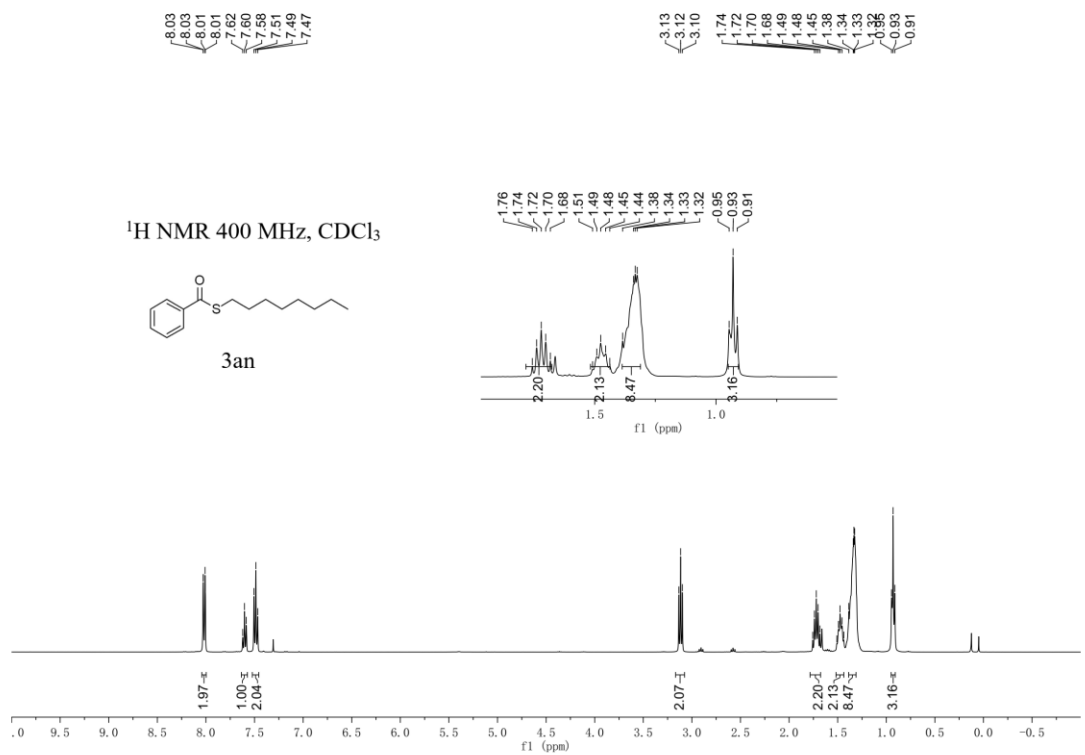

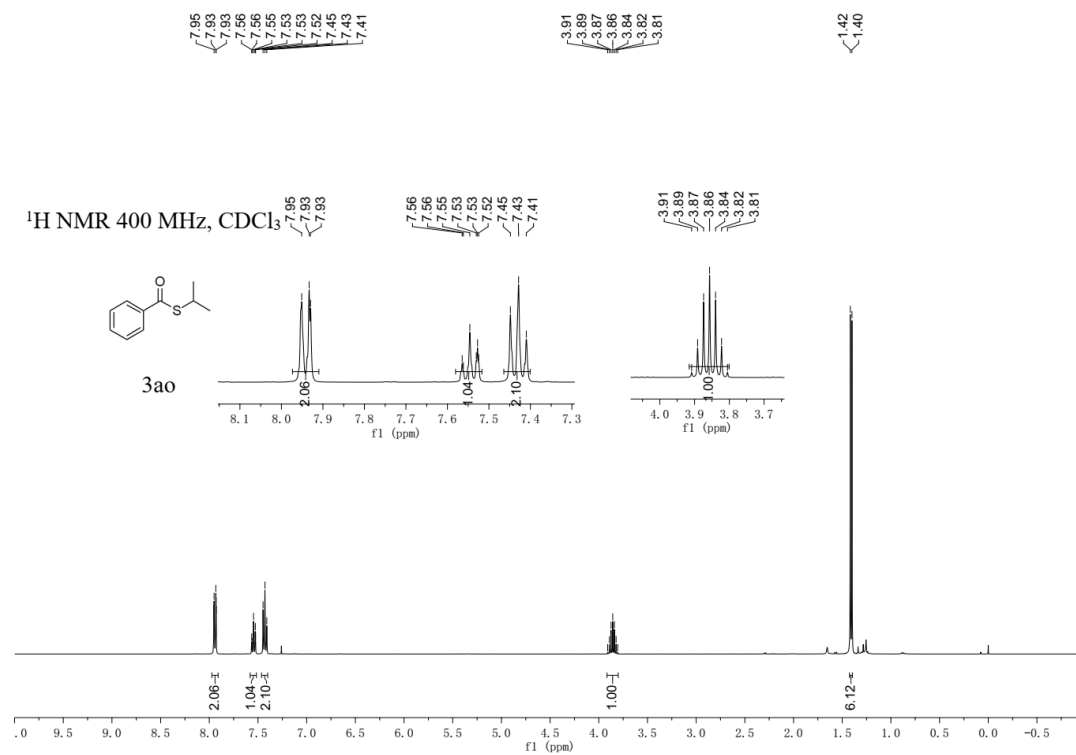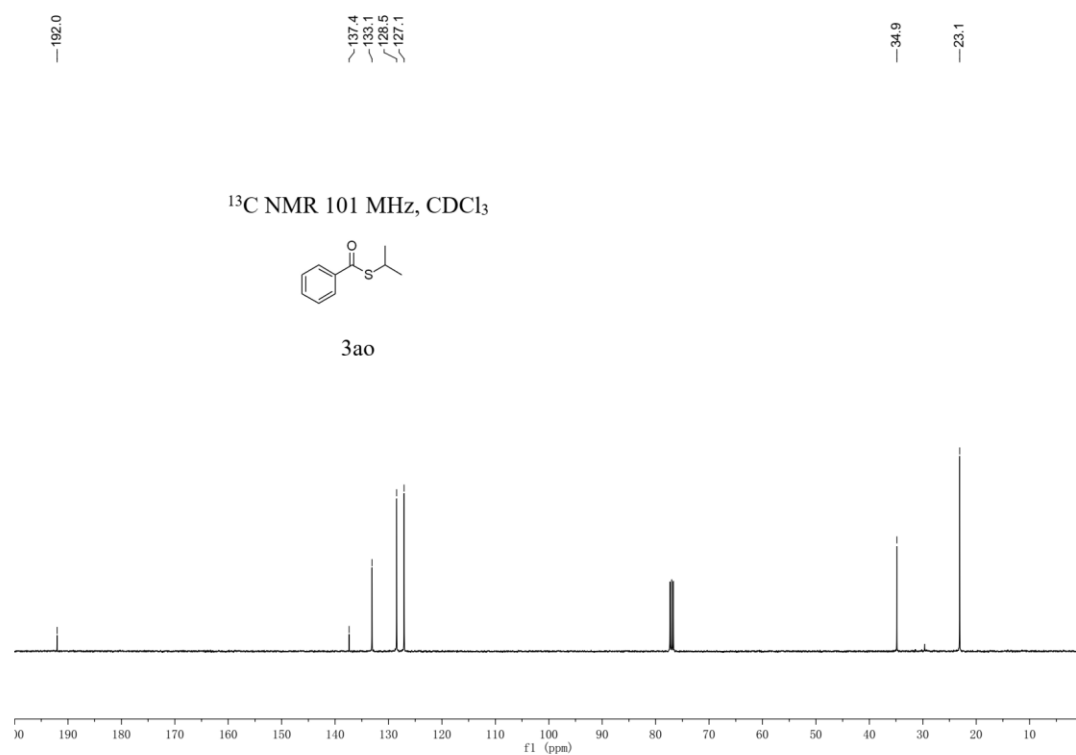

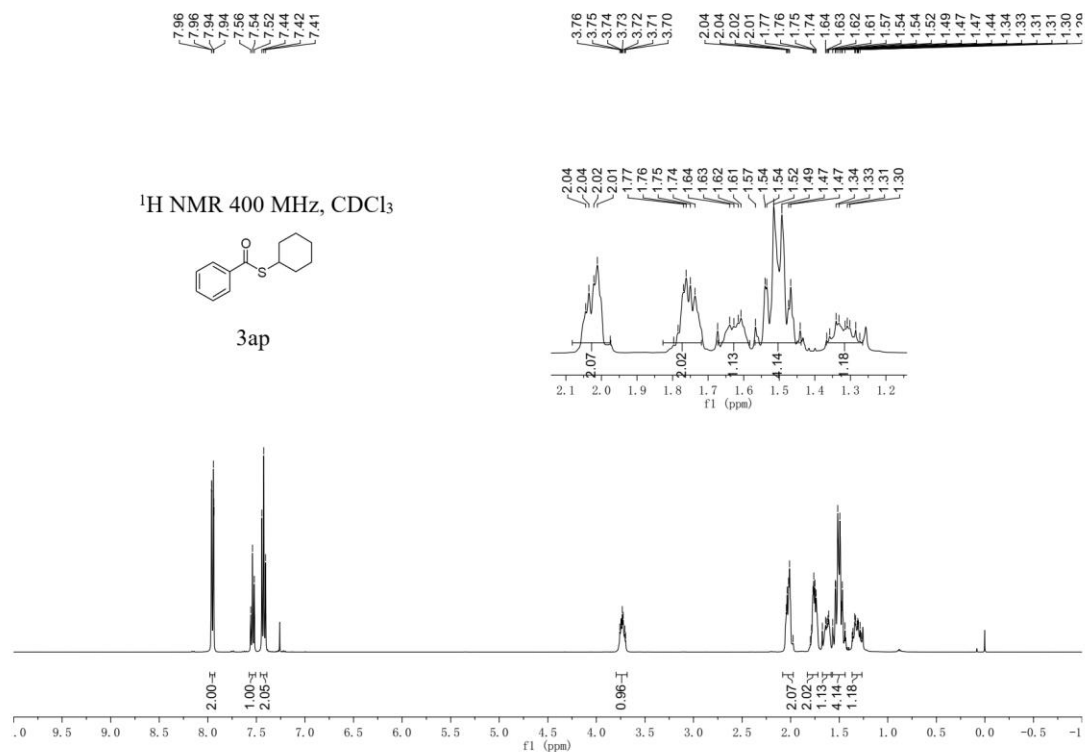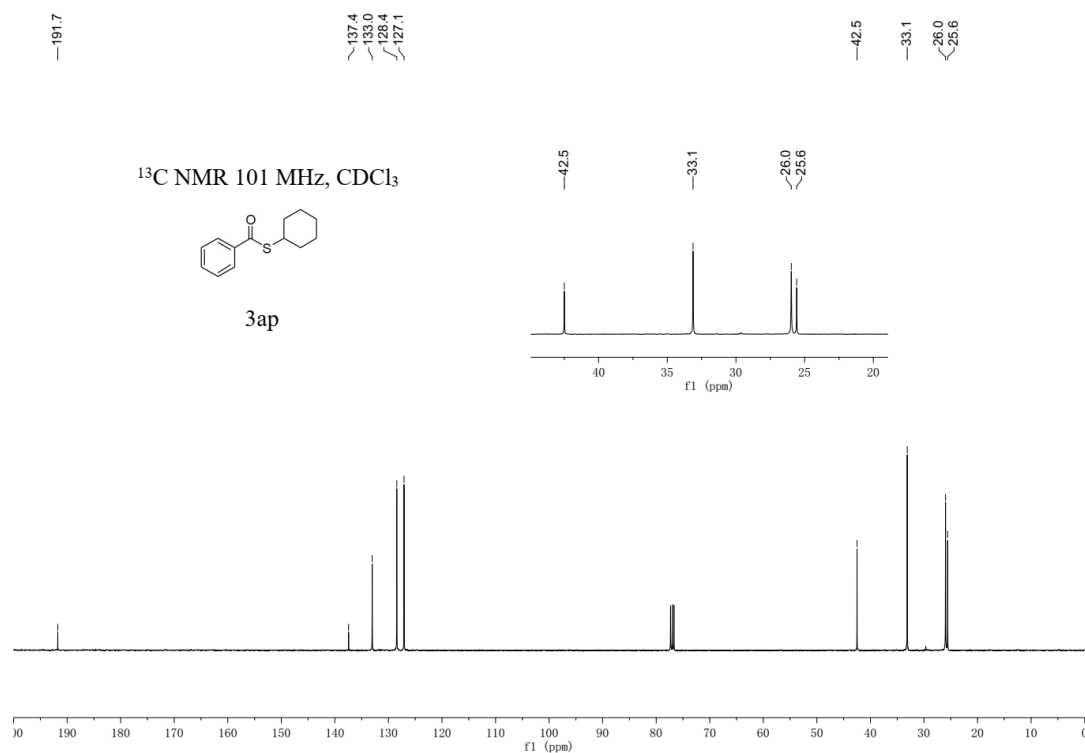

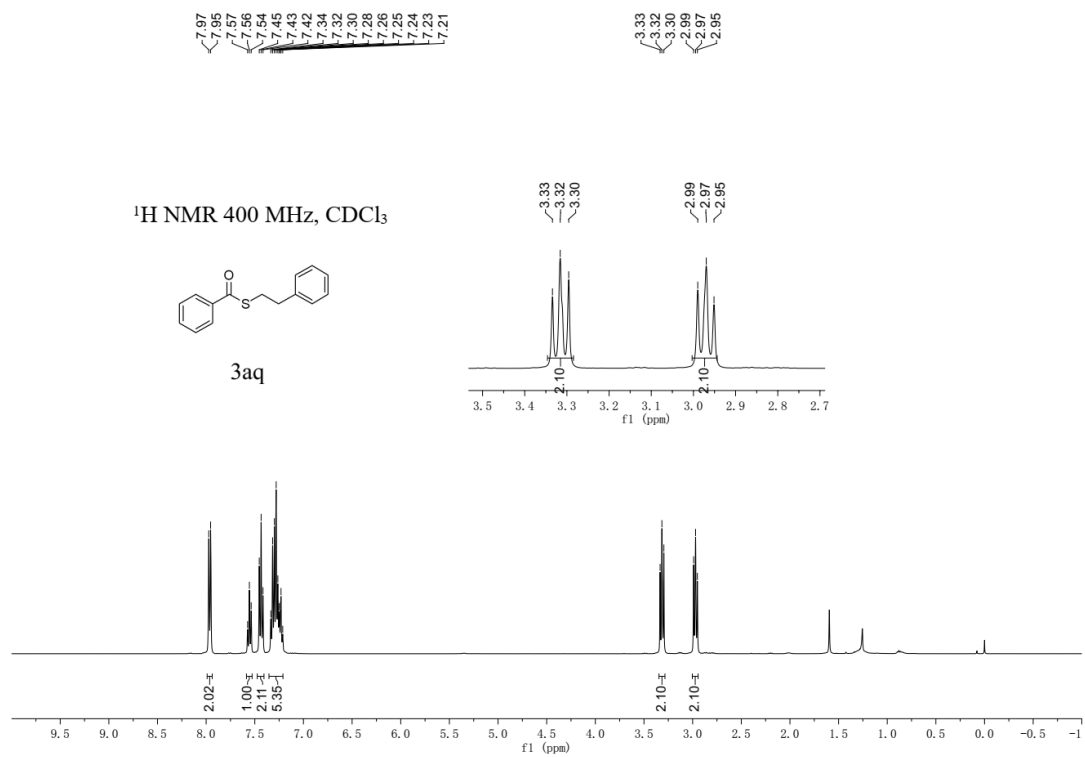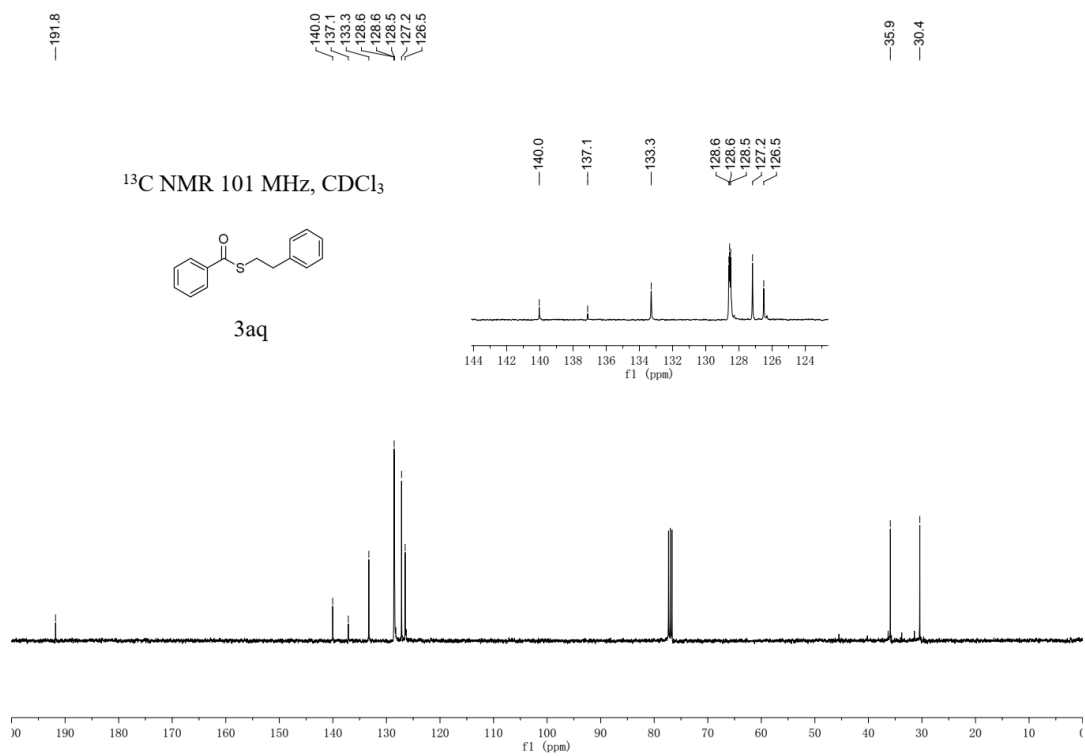

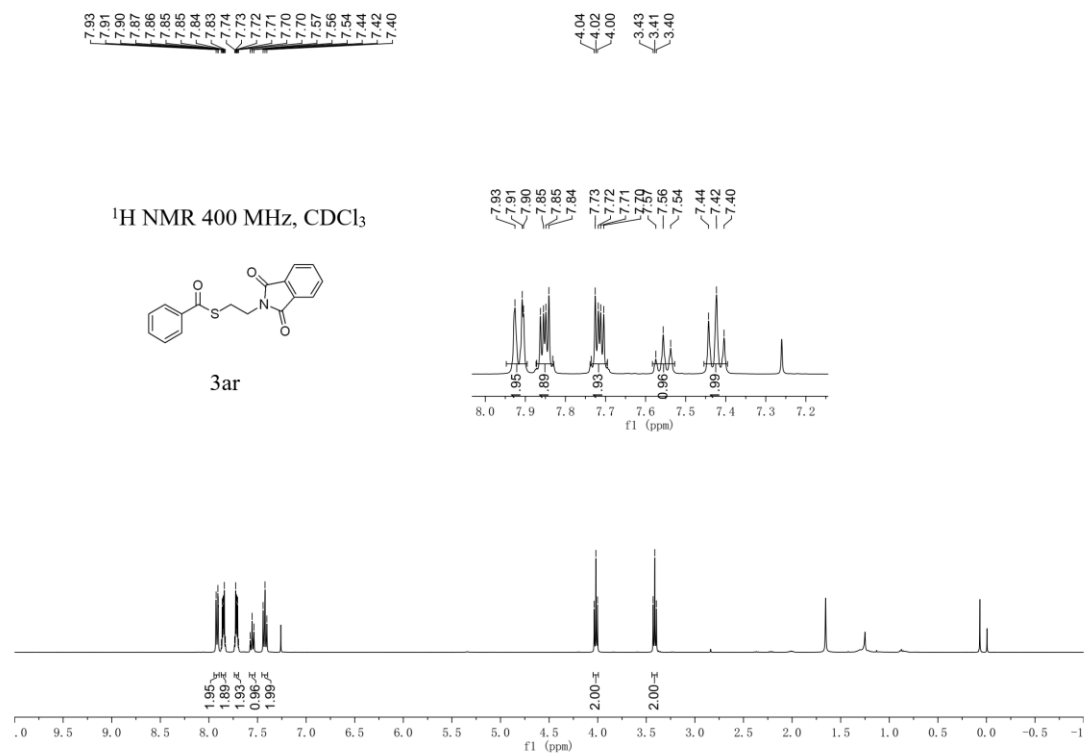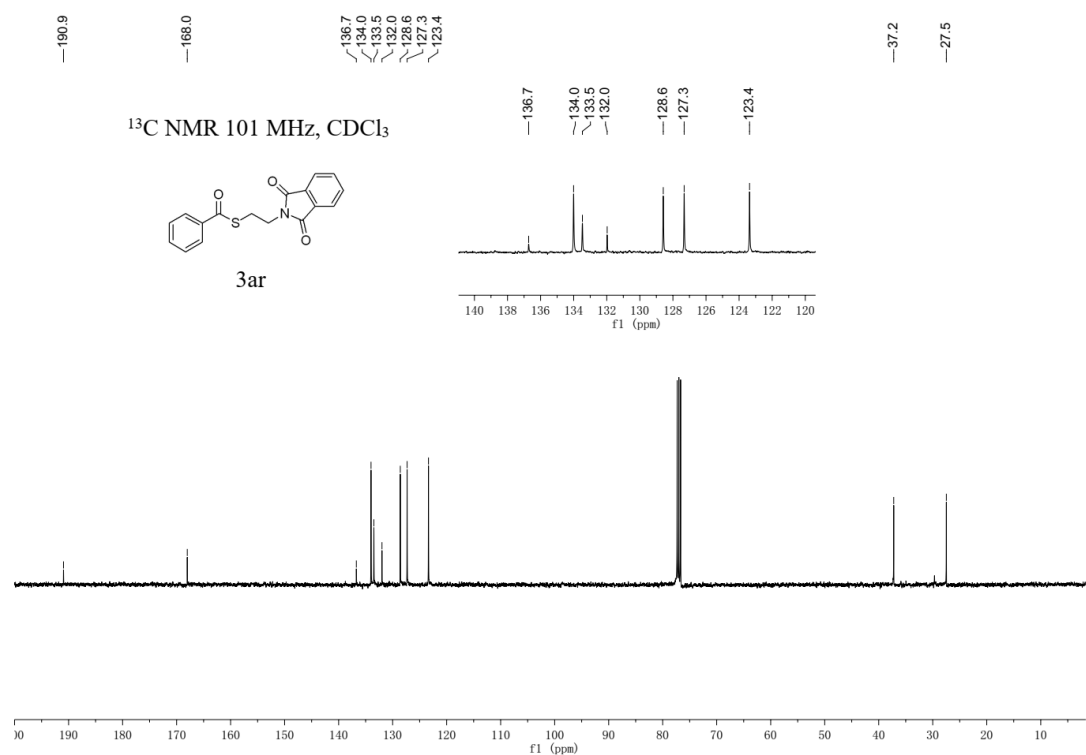

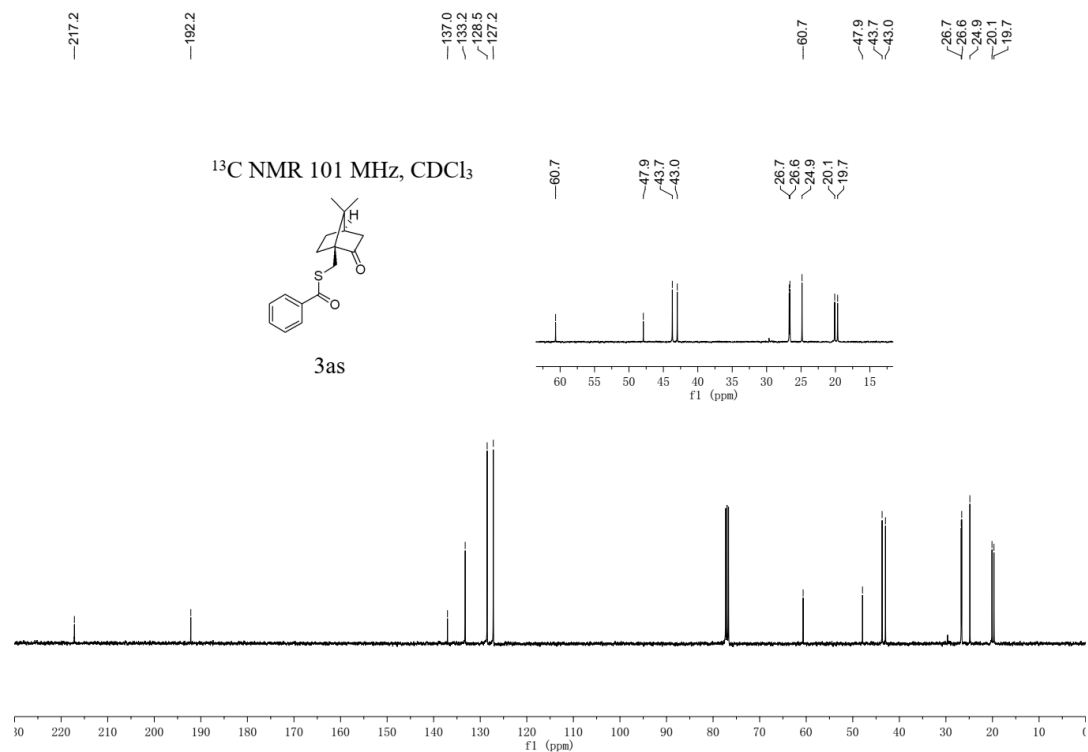

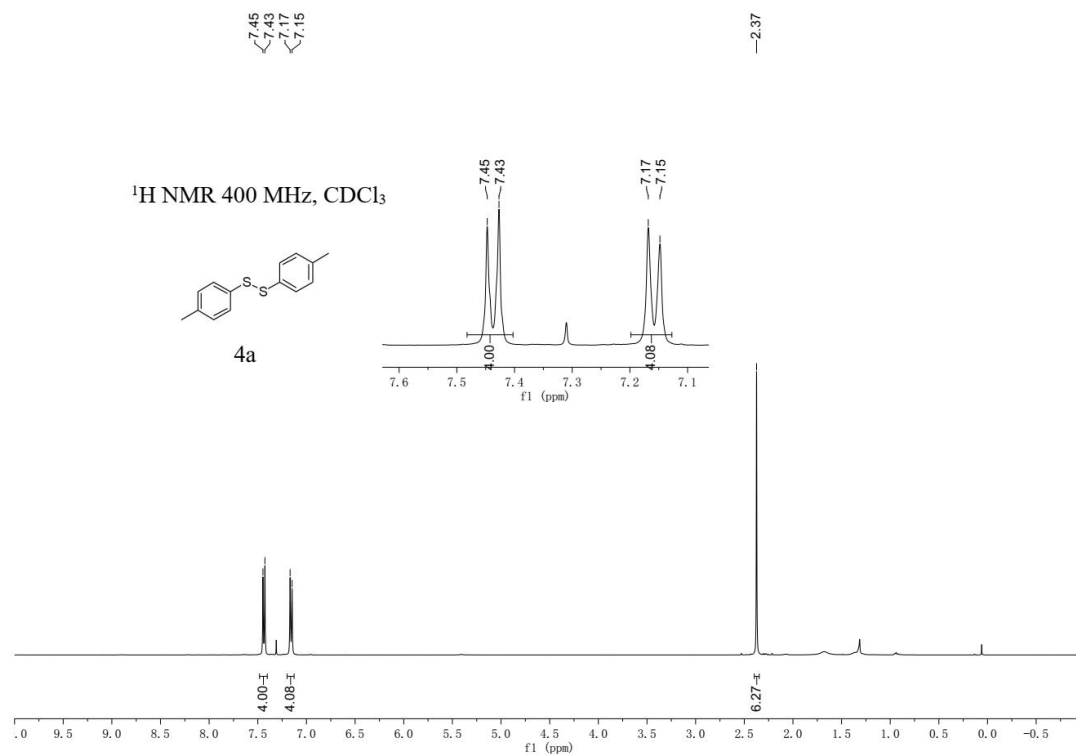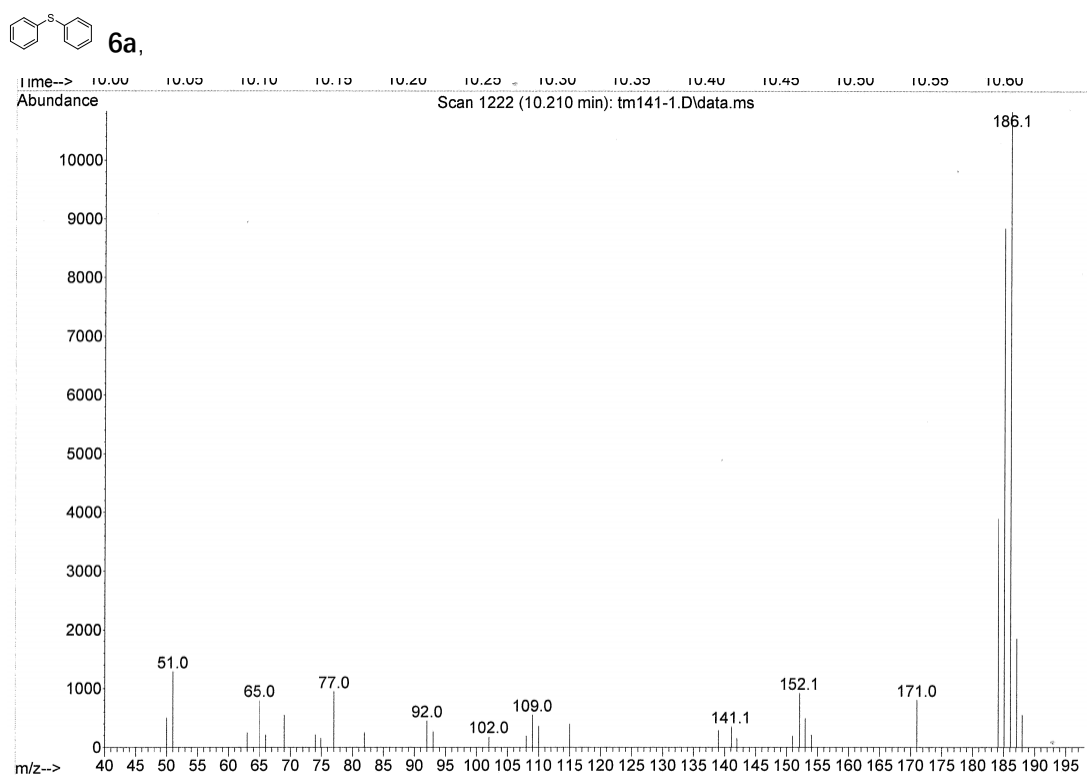

Supplement: Supplementary file 1 [file 24171553]
